# Supplementary material for: Dimethyl sulfoxide as a mild oxidant in S–P(O) bond construction: simple and metal-free approaches to phosphinothioates
Source: Royal Society of Chemistry journal article supplement (doi:10.1039/c6gc03115c), 2016-12-30

## *Supporting information*

### **Dimethyl Sulfoxide as a Mild Oxidant in S-P(O) Bond Construction: Simple and Metal-Free Approaches to Phosphinothioates**

Jian-Guo Sun, Wei-Zhi Weng, Ping Li\* and Bo Zhang\*

*State Key Laboratory of Natural Medicines, China Pharmaceutical University,  
24 Tongjia Xiang, Nanjing 210009, China*

*E-mail: zb3981444@cpu.edu.cn; liping2004@126.com*

#### **Table of contents**

|                                     |     |
|-------------------------------------|-----|
| Optimization of reaction conditions | S2  |
| Physical data of the compounds      | S2  |
| Lager scale experiments             | S19 |
| References                          | S20 |
| NMR spectra                         | S21 |

### Optimization of reaction conditions

**Table S1. Oxidative dehydrogenative phosphorylation of 4-methylbenzenethiol **1a** with diphenylphosphine oxide **2a** in the presence of DMSO as a stoichiometric oxidant under different conditions<sup>a</sup>**

$\text{Me}-\text{C}_6\text{H}_4-\text{S}-\text{H} + \text{H}-\text{P}(\text{O})(\text{Ph})_2 \xrightarrow[\text{solvent, rt}]{\text{DMSO (x equiv)}} \text{Me}-\text{C}_6\text{H}_4-\text{S}-\text{P}(\text{O})(\text{Ph})_2$

**1a**                      **2a**                      **3aa**

| Entry | x  | Reaction time | Solvent            | Yield <sup>b</sup> (%) |
|-------|----|---------------|--------------------|------------------------|
| 1     | 2  | 12            | DCM                | 13                     |
| 2     | 5  | 12            | DCM                | 15                     |
| 3     | 10 | 12            | DCM                | 25                     |
| 4     | 20 | 12            | DCM                | 34                     |
| 5     | 20 | 12            | Acetone            | 26                     |
| 6     | 20 | 12            | THF                | 25                     |
| 7     | 20 | 12            | EtOAc              | 40                     |
| 8     | 20 | 12            | CH <sub>3</sub> CN | 32                     |
| 9     | 20 | 24            | EtOAc              | 44                     |
| 10    | 20 | 48            | EtOAc              | 63                     |
| 11    | 20 | 60            | EtOAc              | 69                     |
| 12    | 20 | 72            | EtOAc              | 76                     |

<sup>a</sup> Reaction conditions: **1a** (0.60 mmol), **2a** (0.30 mmol), and DMSO in solvent (1.5 mL) at room temperature under N<sub>2</sub>. <sup>b</sup> Isolated yields.

### Physical data of the compounds

#### *S*-*p*-tolyl diphenylphosphinothioate (**3aa**)<sup>[1]</sup>

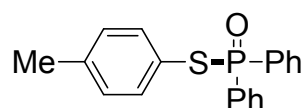

According to **GP1** with 4-methylbenzenethiol **1a** (74.5 mg, 0.6 mmol, 2.0 equiv) and diphenylphosphine oxide **2a** (61.5 mg, 0.3 mmol, 1.0 equiv). The crude reaction mixture was purified by flash silica gel column chromatography (petroleum

ether/EtOAc = 3/1) to afford the desired product **3aa** as white solid (91.3 mg, 94%). According to **GP2** with 1,2-di-*p*-tolylidisulfane **4a** (44.7 mg, 0.18 mmol, 0.6 equiv) and diphenylphosphine oxide **2a** (60.8 mg, 0.3 mmol, 1.0 equiv). The crude reaction mixture was purified by flash silica gel column chromatography (petroleum ether/EtOAc = 3/1) to afford the desired product **3aa** as white solid (77.5 mg, 80%). Mp: 106-108 °C; <sup>1</sup>H NMR (300 MHz, CDCl<sub>3</sub>) δ 7.88-7.81 (m, 4H), 7.49-7.40 (m, 6H), 7.35-7.29 (m, 2H), 6.98 (d, *J* = 7.8 Hz, 2H), 2.22 (s, 3H); <sup>13</sup>C NMR (75 MHz, CDCl<sub>3</sub>) δ 139.0 (d, *J* = 2.2 Hz), 135.2 (d, *J* = 3.9 Hz), 132.7 (d, *J* = 106.1 Hz), 132.1 (d, *J* = 3.3 Hz), 131.5 (d, *J* = 9.9 Hz), 129.8 (d, *J* = 1.7 Hz), 128.4 (d, *J* = 13.2 Hz), 122.2 (d, *J* = 5.0 Hz), 21.0; <sup>31</sup>P NMR (121.5 MHz, CDCl<sub>3</sub>) δ 41.36; HRMS (ESI) calculated for C<sub>19</sub>H<sub>18</sub>OPS [M+H]<sup>+</sup> *m/z* 325.0810, found 325.0806.

### ***S*-*m*-tolyl diphenylphosphinothioate (**3ba**)<sup>[2]</sup>**

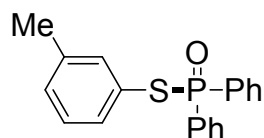

According to **GP1** with 3-methylbenzenethiol **1b** (75.0 mg, 0.6 mmol, 2.0 equiv) and diphenylphosphine oxide **2a** (61.4 mg, 0.3 mmol, 1.0 equiv). The crude reaction mixture was purified by flash silica gel column chromatography (petroleum ether/EtOAc = 3/1) to afford the desired product **3ba** as white solid (80.8 mg, 83%). According to **GP2** with 1,2-di-*m*-tolylidisulfane **4b** (44.8 mg, 0.18 mmol, 0.6 equiv) and diphenylphosphine oxide **2a** (60.6 mg, 0.3 mmol, 1.0 equiv). The crude reaction mixture was purified by flash silica gel column chromatography (petroleum ether/EtOAc = 3/1) to afford the desired product **3ba** as white solid (75.7 mg, 78%). Mp: 96-98 °C; <sup>1</sup>H NMR (500 MHz, CDCl<sub>3</sub>) δ 7.86-7.82 (m, 4H), 7.49-7.46 (m, 2H), 7.43-7.39 (m, 4H), 7.26-7.22 (m, 2H), 7.07-7.02 (m, 2H), 2.20 (s, 3H); <sup>13</sup>C NMR (75 MHz, CDCl<sub>3</sub>) δ 138.7 (d, *J* = 1.7 Hz), 135.8 (d, *J* = 3.8 Hz), 132.4 (d, *J* = 106.1 Hz), 132.1 (d, *J* = 4.4 Hz), 132.0 (d, *J* = 2.8 Hz), 131.4 (d, *J* = 9.9 Hz), 129.6 (d, *J* = 2.3 Hz), 128.7 (d, *J* = 1.7 Hz), 128.3 (d, *J* = 12.7 Hz), 125.5 (d, *J* = 5.5 Hz), 20.9; <sup>31</sup>P NMR (121.5 MHz, CDCl<sub>3</sub>) δ 41.35; HRMS (ESI) calculated for C<sub>19</sub>H<sub>18</sub>OPS [M+H]<sup>+</sup> *m/z* 325.0810, found 325.0816.

### ***S*-*o*-tolyl diphenylphosphinothioate (**3ca**)<sup>[3]</sup>**

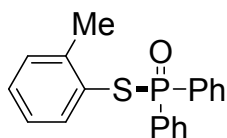

According to **GP1** with 2-methylbenzenethiol **1c** (75.1 mg, 0.6 mmol, 2.0 equiv) and diphenylphosphine oxide **2a** (60.7 mg, 0.3 mmol, 1.0 equiv). The crude reaction mixture was purified by flash silica gel column chromatography (petroleum ether/EtOAc = 3/1) to afford the desired product **3ca** as white solid (82.4 mg, 85%). According to **GP2** with 1,2-di-*o*-tolyl disulfane **4c** (44.5 mg, 0.18 mmol, 0.6 equiv) and diphenylphosphine oxide **2a** (60.5 mg, 0.3 mmol, 1.0 equiv). The crude reaction mixture was purified by flash silica gel column chromatography (petroleum ether/EtOAc = 3/1) to afford the desired product **3ca** as white solid (72.8 mg, 75%). Mp: 70-72 °C;  $^1\text{H NMR}$  (300 MHz,  $\text{CDCl}_3$ )  $\delta$  7.85-7.78 (m, 4H), 7.51-7.38 (m, 7H), 7.17-7.10 (m, 2H), 7.02-6.96 (m, 1H), 2.34 (s, 3H);  $^{13}\text{C NMR}$  (75 MHz,  $\text{CDCl}_3$ )  $\delta$  142.7 (d,  $J = 2.6$  Hz), 136.6 (d,  $J = 3.8$  Hz), 132.8 (d,  $J = 106.0$  Hz), 132.1 (d,  $J = 2.8$  Hz), 131.3 (d,  $J = 10.4$  Hz), 130.6 (d,  $J = 1.7$  Hz), 129.1 (d,  $J = 2.2$  Hz), 128.3 (d,  $J = 13.2$  Hz), 126.3 (d,  $J = 1.7$  Hz), 125.3 (d,  $J = 5.0$  Hz), 21.2;  $^{31}\text{P NMR}$  (121.5 MHz,  $\text{CDCl}_3$ )  $\delta$  41.18; **HRMS** (ESI) calculated for  $\text{C}_{19}\text{H}_{18}\text{OPS}$   $[\text{M}+\text{H}]^+$   $m/z$  325.0810, found 325.0807.

#### ***S*-(4-ethylphenyl) diphenylphosphinothioate (**3da**)<sup>[3]</sup>**

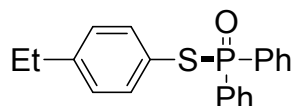

According to **GP1** with 4-ethylbenzenethiol **1d** (83.0 mg, 0.6 mmol, 2.0 equiv) and diphenylphosphine oxide **2a** (61.2 mg, 0.3 mmol, 1.0 equiv). The crude reaction mixture was purified by flash silica gel column chromatography (petroleum ether/EtOAc = 3/1) to afford the desired product **3da** as white solid (85.8 mg, 85%). Mp: 84-86 °C;  $^1\text{H NMR}$  (300 MHz,  $\text{CDCl}_3$ )  $\delta$  7.88-7.81 (m, 4H), 7.51-7.39 (m, 6H), 7.37-7.31 (m, 2H), 7.02 (d,  $J = 7.8$  Hz, 2H), 2.54 (q,  $J = 7.6$  Hz, 2H), 1.14 (t,  $J = 7.6$  Hz, 3H);  $^{13}\text{C NMR}$  (75 MHz,  $\text{CDCl}_3$ )  $\delta$  145.3 (d,  $J = 2.7$  Hz), 135.3 (d,  $J = 3.8$  Hz), 132.6 (d,  $J = 106.1$  Hz), 132.1 (d,  $J = 2.8$  Hz), 131.5 (d,  $J = 10.4$  Hz), 128.6 (d,  $J = 1.7$  Hz), 128.4 (d,  $J = 13.2$  Hz), 122.4 (d,  $J = 5.6$  Hz), 28.3, 15.1;  $^{31}\text{P NMR}$  (121.5 MHz,  $\text{CDCl}_3$ )  $\delta$  41.49; **HRMS** (ESI) calculated for  $\text{C}_{20}\text{H}_{20}\text{OPS}$   $[\text{M}+\text{H}]^+$   $m/z$  339.0967, found 339.0959.

#### ***S*-(4-(*tert*-butyl)phenyl) diphenylphosphinothioate (**3ea**)<sup>[1]</sup>**

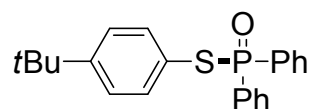

According to **GP1** with 4-(*tert*-butyl)benzenethiol **1e** (100.0 mg, 0.6 mmol, 2.0 equiv) and diphenylphosphine oxide **2a** (60.8 mg, 0.3 mmol, 1.0 equiv). The crude reaction mixture was purified by flash silica gel column chromatography (petroleum ether/EtOAc = 3/1) to afford the desired product **3ea** as white solid (91.6 mg, 83%). Mp: 119-121 °C;  $^1\text{H}$  NMR (300 MHz,  $\text{CDCl}_3$ )  $\delta$  7.87-7.80 (m, 4H), 7.50-7.34 (m, 8H), 7.22-7.19 (m, 2H), 1.22 (s, 9H);  $^{13}\text{C}$  NMR (75 MHz,  $\text{CDCl}_3$ )  $\delta$  152.1 (d,  $J$  = 2.2 Hz), 135.1 (d,  $J$  = 3.8 Hz), 132.7 (d,  $J$  = 106.1 Hz), 132.1 (d,  $J$  = 2.7 Hz), 131.5 (d,  $J$  = 9.8 Hz), 128.3 (d,  $J$  = 13.2 Hz), 126.1 (d,  $J$  = 1.7 Hz), 122.3 (d,  $J$  = 5.0 Hz), 34.4, 31.0;  $^{31}\text{P}$  NMR (121.5 MHz,  $\text{CDCl}_3$ )  $\delta$  41.56; HRMS (ESI) calculated for  $\text{C}_{22}\text{H}_{24}\text{OPS}$   $[\text{M}+\text{H}]^+$   $m/z$  367.1280, found 367.1282.

#### ***S*-(4-methoxyphenyl) diphenylphosphinothioate (3fa)<sup>[1]</sup>**

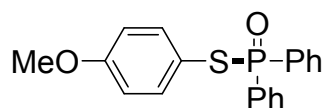

According to **GP1** with 4-methoxybenzenethiol **1f** (84.0 mg, 0.6 mmol, 2.0 equiv), and diphenylphosphine oxide **2a** (61.0 mg, 0.3 mmol, 1.0 equiv). The crude reaction mixture was purified by flash silica gel column chromatography (petroleum ether/EtOAc = 3/1) to afford the desired product **3fa** as white solid (92.0 mg, 90%). According to **GP2** with 1,2-bis(4-methoxyphenyl)disulfane **4f** (50.7 mg, 0.18 mmol, 0.6 equiv) and diphenylphosphine oxide **2a** (60.7 mg, 0.3 mmol, 1.0 equiv). The crude reaction mixture was purified by flash silica gel column chromatography (petroleum ether/EtOAc = 3/1) to afford the desired product **3fa** as white solid (93.5 mg, 92%). Mp: 132-134 °C;  $^1\text{H}$  NMR (300 MHz,  $\text{CDCl}_3$ )  $\delta$  7.87-7.80 (m, 4H), 7.50-7.38 (m, 6H), 7.34-7.31 (m, 2H), 6.74-6.68 (m, 2H), 3.69 (s, 3H);  $^{13}\text{C}$  NMR (75 MHz,  $\text{CDCl}_3$ )  $\delta$  160.3 (d,  $J$  = 2.3 Hz), 136.9 (d,  $J$  = 3.8 Hz), 132.6 (d,  $J$  = 105.5 Hz), 132.1 (d,  $J$  = 3.3 Hz), 131.5 (d,  $J$  = 10.4 Hz), 128.4 (d,  $J$  = 13.2 Hz), 115.9 (d,  $J$  = 5.5 Hz), 114.7 (d,  $J$  = 1.7 Hz), 55.1;  $^{31}\text{P}$  NMR (121.5 MHz,  $\text{CDCl}_3$ )  $\delta$  41.39; HRMS (ESI) calculated for  $\text{C}_{19}\text{H}_{18}\text{O}_2\text{PS}$   $[\text{M}+\text{H}]^+$   $m/z$  341.0760, found 341.0755.

#### ***S*-(4-hydroxyphenyl) diphenylphosphinothioate (3ga)<sup>[3]</sup>**

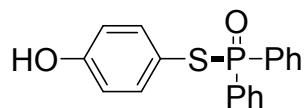

According to **GP1** with 4-mercaptophenol **1g** (75.7 mg, 0.6 mmol, 2.0 equiv) and diphenylphosphine oxide **2a** (60.4 mg, 0.3 mmol, 1.0 equiv). The crude reaction mixture was purified by flash silica gel column chromatography (petroleum ether/EtOAc = 3/1) to afford the desired product **3ga** as white solid (94.1 mg, 96%). According to **GP2** with 4,4'-disulfanediyl diphenol **4g** (45.9 mg, 0.18 mmol, 0.6 equiv) and diphenylphosphine oxide **2a** (61.5 mg, 0.3 mmol, 1.0 equiv). The crude reaction mixture was purified by flash silica gel column chromatography (petroleum ether/EtOAc = 3/1) to afford the desired product **3ga** as white solid (93.0 mg, 95%). Mp: 137-139 °C; **<sup>1</sup>H NMR** (300 MHz, CDCl<sub>3</sub>) δ 9.61 (br s, 1H), 7.89-7.83 (m, 4H), 7.57-7.44 (m, 6H), 7.09-7.06 (m, 2H), 6.53-6.50 (m, 2H); **<sup>13</sup>C NMR** (75 MHz, CDCl<sub>3</sub>) δ 159.1 (d, *J* = 2.2 Hz), 137.3 (d, *J* = 2.8 Hz), 132.1 (d, *J* = 106.1 Hz), 132.5 (d, *J* = 2.7 Hz), 131.5 (d, *J* = 10.4 Hz), 128.7 (d, *J* = 13.2 Hz), 117.4 (d, *J* = 2.2 Hz), 112.1 (d, *J* = 5.6 Hz); **<sup>31</sup>P NMR** (121.5 MHz, CDCl<sub>3</sub>) δ 43.12; **HRMS** (ESI) calculated for C<sub>18</sub>H<sub>16</sub>O<sub>2</sub>PS [M+H]<sup>+</sup> *m/z* 327.0603, found 327.0604.

***S*-(4-aminophenyl) diphenylphosphinothioate (3ha)<sup>[3]</sup>**

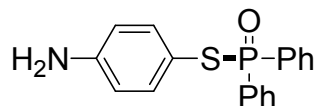

According to **GP1** with 4-aminobenzenethiol **1h** (75.1 mg, 0.6 mmol, 2.0 equiv), and diphenylphosphine oxide **2a** (61.3 mg, 0.3 mmol, 1.0 equiv). The crude reaction mixture was purified by flash silica gel column chromatography (petroleum ether/EtOAc = 3/1) to afford the desired product **3ha** as white solid (70.2 mg, 72%). Mp: 167-169 °C; **<sup>1</sup>H NMR** (300 MHz, CDCl<sub>3</sub>) δ 7.86-7.80 (m, 4H), 7.51-7.39 (m, 6H), 7.19-7.10 (m, 2H), 6.48-6.40 (m, 2H), 3.62 (br s, 2H); **<sup>13</sup>C NMR** (125 MHz, CDCl<sub>3</sub>) δ 147.8, 136.9 (d, *J* = 2.9 Hz), 132.9 (d, *J* = 105.0 Hz), 132.0 (d, *J* = 3.0 Hz), 131.6 (d, *J* = 10.8 Hz), 128.4 (d, *J* = 12.6 Hz), 115.5, 111.9 (d, *J* = 4.9 Hz); **<sup>31</sup>P NMR** (121.5 MHz, CDCl<sub>3</sub>) δ 41.36; **HRMS** (ESI) calculated for C<sub>18</sub>H<sub>17</sub>NOPS [M+H]<sup>+</sup> *m/z* 326.0763, found 326.0762.

***S*-(4-fluorophenyl) diphenylphosphinothioate (3ia)<sup>[1]</sup>**

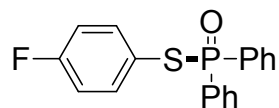

According to **GP1** with 4-fluorobenzenethiol **1i** (76.9 mg, 0.6 mmol, 2.0 equiv) and diphenylphosphine oxide **2a** (61.4 mg, 0.3 mmol, 1.0 equiv). The crude reaction mixture was purified by flash silica gel column chromatography (petroleum ether/EtOAc = 3/1) to afford the desired product **3ia** as white solid (80.3 mg, 82%). According to **GP2** with 1,2-bis(4-fluorophenyl)disulfane **4i** (45.8 mg, 0.18 mmol, 0.6 equiv) and diphenylphosphine oxide **2a** (60.9 mg, 0.3 mmol, 1.0 equiv). The crude reaction mixture was purified by flash silica gel column chromatography (petroleum ether/EtOAc = 3/1) to afford the desired product **3ia** as white solid (71.5 mg, 73%). Mp: 93-95 °C;  $^1\text{H NMR}$  (300 MHz,  $\text{CDCl}_3$ )  $\delta$  7.87-7.80 (m, 4H), 7.53-7.39 (m, 8H), 6.91-6.86 (m, 2H);  $^{13}\text{C NMR}$  (75 MHz,  $\text{CDCl}_3$ )  $\delta$  163.3 (dd,  $J$  = 248.4, 2.2 Hz), 137.3 (dd,  $J$  = 8.5, 3.6 Hz), 132.3 (d,  $J$  = 3.3 Hz), 132.1 (d,  $J$  = 106.6 Hz), 131.4 (d,  $J$  = 10.4 Hz), 128.5 (d,  $J$  = 13.2 Hz), 121.2 (dd,  $J$  = 5.0, 3.3 Hz), 116.2 (dd,  $J$  = 22.0, 1.7 Hz);  $^{31}\text{P NMR}$  (121.5 MHz,  $\text{CDCl}_3$ )  $\delta$  41.66; **HRMS** (ESI) calculated for  $\text{C}_{18}\text{H}_{15}\text{FOPS}$   $[\text{M}+\text{H}]^+$   $m/z$  329.0560, found 329.0551.

#### ***S*-(4-chlorophenyl) diphenylphosphinothioate (**3ja**)<sup>[2]</sup>**

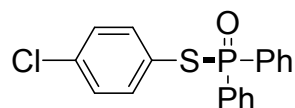

According to **GP1** with 4-chlorobenzenethiol **1j** (87.4 mg, 0.6 mmol, 2.0 equiv) and diphenylphosphine oxide **2a** (61.7 mg, 0.3 mmol, 1.0 equiv). The crude reaction mixture was purified by flash silica gel column chromatography (petroleum ether/EtOAc = 3/1) to afford the desired product **3ja** as white solid (76.0 mg, 74%). According to **GP2** with 1,2-bis(4-chlorophenyl)disulfane **4j** (51.7 mg, 0.18 mmol, 0.6 equiv) and diphenylphosphine oxide **2a** (60.9 mg, 0.3 mmol, 1.0 equiv). The crude reaction mixture was purified by flash silica gel column chromatography (petroleum ether/EtOAc = 3/1) to afford the desired product **3ja** as white solid (60.0 mg, 58%). Mp: 95-97 °C;  $^1\text{H NMR}$  (300 MHz,  $\text{CDCl}_3$ )  $\delta$  7.87-7.80 (m, 4H), 7.54-7.36 (m, 8H), 7.18-7.15 (m, 2H);  $^{13}\text{C NMR}$  (125 MHz,  $\text{CDCl}_3$ )  $\delta$  136.5 (d,  $J$  = 3.9 Hz), 135.5 (d,  $J$  = 2.0 Hz), 132.4 (d,  $J$  = 2.9 Hz), 132.3 (d,  $J$  = 107.0 Hz), 131.6 (d,  $J$  = 10.8 Hz), 129.3, 128.6 (d,  $J$  = 13.6 Hz), 124.7 (d,  $J$  = 4.9 Hz);  $^{31}\text{P NMR}$  (121.5 MHz,  $\text{CDCl}_3$ )  $\delta$  41.67; **HRMS** (ESI) calculated for  $\text{C}_{18}\text{H}_{15}\text{ClOPS}$   $[\text{M}+\text{H}]^+$   $m/z$  345.0264, found 345.0256.

#### ***S*-(4-bromophenyl) diphenylphosphinothioate (**3ka**)<sup>[3]</sup>**

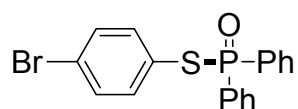

According to **GP1** with 4-bromobenzenethiol **1k** (114.2mg, 0.6 mmol, 2.0 equiv) and diphenylphosphine oxide **2a** (61.5 mg, 0.3 mmol, 1.0 equiv). The crude reaction mixture was purified by flash silica gel column chromatography (petroleum ether/EtOAc = 3/1) to afford the desired product **3ka** as white solid (69.8 mg, 60%). Mp: 93-95 °C; <sup>1</sup>H NMR (500 MHz, CDCl<sub>3</sub>) δ 7.86-7.82 (m, 4H), 7.53-7.50 (m, 2H), 7.46-7.42 (m, 4H), 7.31 (s, 4H); <sup>13</sup>C NMR (125 MHz, CDCl<sub>3</sub>) δ 136.7 (d, *J* = 2.9 Hz), 132.2 (d, *J* = 107.0 Hz), 132.4, 132.2, 131.5 (d, *J* = 10.8 Hz), 128.6 (d, *J* = 13.6 Hz), 125.4 (d, *J* = 4.9 Hz), 123.7 (d, *J* = 2.9 Hz); <sup>31</sup>P NMR (121.5 MHz, CDCl<sub>3</sub>) δ 41.45; HRMS (ESI) calculated for C<sub>18</sub>H<sub>15</sub>BrOPS [M+H]<sup>+</sup> *m/z* 388.9759, found 388.9747.

#### **S-phenyl diphenylphosphinothioate (3la)**<sup>[2]</sup>

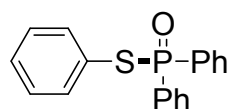

According to **GP1** with benzenethiol **1l** (66.1 mg, 0.6 mmol, 2.0 equiv) and diphenylphosphine oxide **2a** (60.6 mg, 0.3 mmol, 1.0 equiv). The crude reaction mixture was purified by flash silica gel column chromatography (petroleum ether/EtOAc = 3/1) to afford the desired product **3la** as white solid (73.2 mg, 79%). According to **GP2** with 1,2-diphenyldisulfane **4l** (40.0 mg, 0.18 mmol, 0.6 equiv) and diphenylphosphine oxide **2a** (60.7 mg, 0.3 mmol, 1.0 equiv). The crude reaction mixture was purified by flash silica gel column chromatography (petroleum ether/EtOAc = 3/1) to afford the desired product **3la** as white solid (75.4 mg, 81%). Mp: 86-88 °C; <sup>1</sup>H NMR (300 MHz, CDCl<sub>3</sub>) δ 7.88-7.81 (m, 4H), 7.50-7.38 (m, 8H), 7.24-7.14 (m, 3H); <sup>13</sup>C NMR (75 MHz, CDCl<sub>3</sub>) δ 135.2 (d, *J* = 3.8 Hz), 132.4 (d, *J* = 106.7 Hz), 132.2 (d, *J* = 2.7 Hz), 131.5 (d, *J* = 10.4 Hz), 129.0 (d, *J* = 1.7 Hz), 128.8 (d, *J* = 2.3 Hz), 128.4 (d, *J* = 13.2 Hz), 126.0 (d, *J* = 5.0 Hz); <sup>31</sup>P NMR (121.5 MHz, CDCl<sub>3</sub>) δ 41.79; HRMS (ESI) calculated for C<sub>18</sub>H<sub>16</sub>OPS [M+H]<sup>+</sup> *m/z* 311.0654, found 311.0653.

#### **S-naphthalen-2-yl diphenylphosphinothioate (3ma)**<sup>[1]</sup>



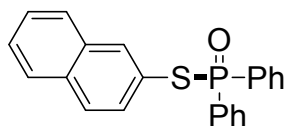

According to **GP1** with naphthalene-2-thiol **1m** (96.6 mg, 0.6 mmol, 2.0 equiv) and diphenylphosphine oxide **2a** (61.5 mg, 0.3 mmol, 1.0 equiv). The crude reaction mixture was purified by flash silica gel column chromatography (petroleum ether/EtOAc = 3/1) to afford the desired product **3ma** as white solid (86.6 mg, 80%). According to **GP2** with 1,2-di(naphthalen-2-yl)disulfane **4m** (58.7 mg, 0.18 mmol, 0.6 equiv) and diphenylphosphine oxide **2a** (60.4 mg, 0.3 mmol, 1.0 equiv). The crude reaction mixture was purified by flash silica gel column chromatography (petroleum ether/EtOAc = 3/1) to afford the desired product **3ma** as white solid (80.5 mg, 74%). Mp: 108-110 °C; **<sup>1</sup>H NMR** (300 MHz, CDCl<sub>3</sub>) δ 7.98 (s, 1H), 7.90-7.83 (m, 4H), 7.71-7.61 (m, 3H), 7.49-7.36 (m, 9H); **<sup>13</sup>C NMR** (75 MHz, CDCl<sub>3</sub>) δ 135.2 (d, *J* = 4.9 Hz), 133.4 (d, *J* = 1.7 Hz), 132.8 (d, *J* = 1.7 Hz), 132.4 (d, *J* = 106.7 Hz), 132.1 (d, *J* = 2.7 Hz), 131.5 (d, *J* = 9.9 Hz), 131.4, 128.5, 128.4 (d, *J* = 13.2 Hz), 127.6, 127.4, 126.7, 126.3, 123.4 (d, *J* = 5.0 Hz); **<sup>31</sup>P NMR** (121.5 MHz, CDCl<sub>3</sub>) δ 41.63; **HRMS** (ESI) calculated for C<sub>22</sub>H<sub>18</sub>OPS [M+H]<sup>+</sup> *m/z* 361.0810, found 361.0806.

### **S-naphthalen-1-yl diphenylphosphinothioate (3na)<sup>[3]</sup>**

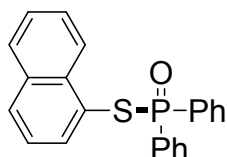

According to **GP1** with naphthalene-1-thiol **1n** (96.1 mg, 0.6 mmol, 2.0 equiv) and diphenylphosphine oxide **2a** (60.4 mg, 0.3 mmol, 1.0 equiv). The crude reaction mixture was purified by flash silica gel column chromatography (petroleum ether/EtOAc = 3/1) to afford the desired product **3na** as white solid (64.6 mg, 60%). Mp: 100-102 °C; **<sup>1</sup>H NMR** (300 MHz, CDCl<sub>3</sub>) δ 8.39 (d, *J* = 8.1 Hz, 1H), 7.85-7.78 (m, 5H), 7.74-7.70 (m, 2H), 7.48-7.38 (m, 4H), 7.35-7.24 (m, 5H); **<sup>13</sup>C NMR** (125 MHz, CDCl<sub>3</sub>) δ 135.4 (d, *J* = 4.9 Hz), 134.9 (d, *J* = 3.0 Hz), 134.0, 132.5 (d, *J* = 106.0 Hz), 132.1 (d, *J* = 2.9 Hz), 131.4 (d, *J* = 10.8 Hz), 129.9 (d, *J* = 2.9 Hz), 128.3 (d, *J* = 13.6 Hz), 128.2, 126.6, 126.1, 125.9, 125.4, 123.6 (d, *J* = 5.9 Hz); **<sup>31</sup>P NMR** (121.5 MHz, CDCl<sub>3</sub>) δ 41.63; **HRMS** (ESI) calculated for C<sub>22</sub>H<sub>18</sub>OPS [M+H]<sup>+</sup> *m/z* 361.0810, found 361.0813.

### **S-cyclohexyl diphenylphosphinothioate (3oa)<sup>[3]</sup>**

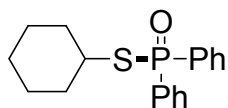

According to **GP1** with cyclohexanethiol **1o** (69.7 mg, 0.6 mmol, 2.0 equiv) and diphenylphosphine oxide **2a** (60.7 mg, 0.3 mmol, 1.0 equiv). The crude reaction mixture was purified by flash silica gel column chromatography (petroleum ether/EtOAc = 3/1) to afford the desired product **3oa** as white solid (52.0 mg, 55%). According to **GP2** with 1,2-dicyclohexyldisulfane **4o** (41.5 mg, 0.18 mmol, 0.6 equiv) and diphenylphosphine oxide **2a** (60.8 mg, 0.3 mmol, 1.0 equiv). The crude reaction mixture was purified by flash silica gel column chromatography (petroleum ether/EtOAc = 3/1) to afford the desired product **3oa** as white solid (39.4 mg, 42%). Mp: 75-77 °C; <sup>1</sup>H NMR (300 MHz, CDCl<sub>3</sub>) δ 7.91-7.84 (m, 4H), 7.51-7.43 (m, 6H), 3.36-3.25 (m, 1H), 1.96-1.93 (m, 2H), 1.69-1.64 (m, 2H), 1.58-1.45 (m, 3H), 1.34-1.17 (m, 3H); <sup>13</sup>C NMR (75 MHz, CDCl<sub>3</sub>) δ 134.1 (d, *J* = 106.1 Hz), 132.0 (d, *J* = 3.3 Hz), 131.3 (d, *J* = 9.9 Hz), 128.4 (d, *J* = 13.1 Hz), 44.4 (d, *J* = 1.7 Hz), 35.5 (d, *J* = 3.9 Hz), 25.6, 25.2; <sup>31</sup>P NMR (121.5 MHz, CDCl<sub>3</sub>) δ 41.97; HRMS (ESI) calculated for C<sub>18</sub>H<sub>22</sub>OPS [M+H]<sup>+</sup> *m/z* 317.1123, found 317.1126.

#### ***S*-propyl diphenylphosphinothioate (3pa)<sup>[2]</sup>**

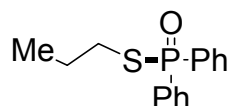

According to **GP1** with propane-1-thiol **1p** (46.0 mg, 0.6 mmol, 2.0 equiv) and diphenylphosphine oxide **2a** (60.7 mg, 0.3 mmol, 1.0 equiv). The crude reaction mixture was purified by flash silica gel column chromatography (petroleum ether/EtOAc = 3/1) to afford the desired product **3pa** as white solid (36.9 mg, 45%). According to **GP2** with 1,2-dipropyldisulfane **4p** (27.1 mg, 0.18 mmol, 0.6 equiv) and diphenylphosphine oxide **2a** (60.9 mg, 0.3 mmol, 1.0 equiv). The crude reaction mixture was purified by flash silica gel column chromatography (petroleum ether/EtOAc = 3/1) to afford the desired product **3pa** as colorless oil (64.8 mg, 78%). <sup>1</sup>H NMR (300 MHz, CDCl<sub>3</sub>) δ 7.92-7.85 (m, 4H), 7.54-7.43 (m, 6H), 2.82-2.74 (m, 2H), 1.71-1.59 (m, 2H), 0.93 (t, *J* = 7.4 Hz, 3H); <sup>13</sup>C NMR (75 MHz, CDCl<sub>3</sub>) δ 133.4 (d, *J* = 106.7 Hz), 132.1 (d, *J* = 3.3 Hz), 131.3 (d, *J* = 10.4 Hz), 128.5 (d, *J* = 12.6 Hz), 31.1 (d, *J* = 2.2 Hz), 23.9 (d, *J* = 5.0 Hz), 13.1; <sup>31</sup>P NMR (121.5 MHz, CDCl<sub>3</sub>) δ 43.30; HRMS (ESI) calculated for C<sub>15</sub>H<sub>18</sub>OPS [M+H]<sup>+</sup> *m/z* 277.0810, found 277.0815.

### ***S*-benzyl diphenylphosphinothioate (3qa)<sup>[3]</sup>**

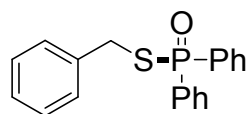

According to **GP1** with phenylmethanethiol **1q** (74.5 mg, 0.6 mmol, 2.0 equiv) and diphenylphosphine oxide **2a** (61.0 mg, 0.3 mmol, 1.0 equiv). The crude reaction mixture was purified by flash silica gel column chromatography (petroleum ether/EtOAc = 3/1) to afford the desired product **3qa** as white solid (63.3 mg, 65%). According to **GP2** with 1,2-dibenzyldisulfane **4q** (45.0 mg, 0.18 mmol, 0.6 equiv) and diphenylphosphine oxide **2a** (60.9 mg, 0.3 mmol, 1.0 equiv). The crude reaction mixture was purified by flash silica gel column chromatography (petroleum ether/EtOAc = 3/1) to afford the desired product **3qa** as colorless oil (51.7 mg, 53%). **<sup>1</sup>H NMR** (300 MHz, CDCl<sub>3</sub>) δ 7.90-7.83 (m, 4H), 7.53-7.41 (m, 6H), 7.23-7.14 (m, 5H), 4.02 (d, *J* = 9.3 Hz, 2H); **<sup>13</sup>C NMR** (125 MHz, CDCl<sub>3</sub>) δ 136.8 (d, *J* = 4.9 Hz), 133.1 (d, *J* = 105.9 Hz), 132.2 (d, *J* = 2.9 Hz), 131.4 (d, *J* = 9.8 Hz), 128.9, 128.6, 128.5 (d, *J* = 4.9 Hz), 127.3, 33.1 (d, *J* = 2.0 Hz); **<sup>31</sup>P NMR** (121.5 MHz, CDCl<sub>3</sub>) δ 42.83; **HRMS** (ESI) calculated for C<sub>19</sub>H<sub>18</sub>OPS [M+H]<sup>+</sup> *m/z* 325.0815, found 325.0810.

### ***S-p*-tolyl di-*p*-tolylphosphinothioate (3ab)<sup>[3]</sup>**

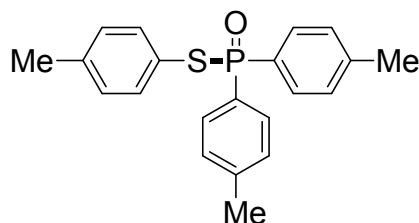

According to **GP1** with 4-methylbenzenethiol **1a** (74.8 mg, 0.6 mmol, 2.0 equiv) and di-*p*-tolylphosphine oxide **2b** (70.5 mg, 0.3 mmol, 1.0 equiv). The crude reaction mixture was purified by flash silica gel column chromatography (petroleum ether/EtOAc = 3/1) to afford the desired product **3ab** as colorless oil (80.9 mg, 77%). According to **GP2** with 1,2-di-*p*-tolyldisulfane **4a** (45.0 mg, 0.18 mmol, 0.6 equiv) and di-*p*-tolylphosphine oxide **2b** (71.1 mg, 0.3 mmol, 1.0 equiv). The crude reaction mixture was purified by flash silica gel column chromatography (petroleum ether/EtOAc = 3/1) to afford the desired product **3ab** as colorless oil (71.5 mg, 68%). **<sup>1</sup>H NMR** (300 MHz, CDCl<sub>3</sub>) δ 7.75-7.68 (m, 4H), 7.34-7.31 (m, 2H), 7.23-7.20 (m, 4H), 6.99 (d, *J* = 8.1 Hz, 2H), 2.35 (s, 6H), 2.23 (s, 3H); **<sup>13</sup>C NMR** (75 MHz, CDCl<sub>3</sub>)

$\delta$  142.5 (d,  $J = 3.3$  Hz), 138.7 (d,  $J = 2.3$  Hz), 135.0 (d,  $J = 3.3$  Hz), 131.4 (d,  $J = 10.4$  Hz), 129.7 (d,  $J = 1.7$  Hz), 129.5 (d,  $J = 108.9$  Hz), 129.0 (d,  $J = 13.7$  Hz), 122.6 (d,  $J = 5.0$  Hz), 21.4, 20.9;  **$^{31}\text{P}$  NMR** (121.5 MHz,  $\text{CDCl}_3$ )  $\delta$  42.01; **HRMS** (ESI) calculated for  $\text{C}_{21}\text{H}_{22}\text{OPS}$   $[\text{M}+\text{H}]^+$   $m/z$  353.1123, found 353.1123.

***S-p*-tolyl di-*m*-tolylphosphinothioate (**3ac**)<sup>[3]</sup>**

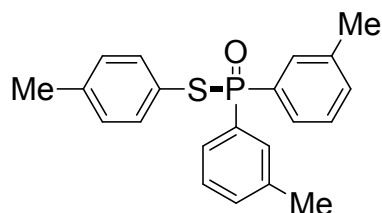

According to **GP1** with 4-methylbenzenethiol **1a** (74.6 mg, 0.6 mmol, 2.0 equiv) and di-*m*-tolylphosphine oxide **2c** (70.5 mg, 0.3 mmol, 1.0 equiv). The crude reaction mixture was purified by flash silica gel column chromatography (petroleum ether/EtOAc = 3/1) to afford the desired product **3ac** as white solid (83.6 mg, 79%). According to **GP2** with 1,2-di-*p*-tolyldisulfane **4a** (44.6 mg, 0.18 mmol, 0.6 equiv) and di-*m*-tolylphosphine oxide **2c** (69.7 mg, 0.3 mmol, 1.0 equiv). The crude reaction mixture was purified by flash silica gel column chromatography (petroleum ether/EtOAc = 3/1) to afford the desired product **3ac** as white solid (80.3 mg, 76%). Mp: 59-61 °C;  **$^1\text{H}$  NMR** (300 MHz,  $\text{CDCl}_3$ )  $\delta$  7.69-7.59 (m, 4H), 7.39-7.28 (m, 6H), 7.00 (d,  $J = 7.8$  Hz, 2H), 2.33 (s, 6H), 2.24 (s, 3H);  **$^{13}\text{C}$  NMR** (75 MHz,  $\text{CDCl}_3$ )  $\delta$  138.9 (d,  $J = 2.2$  Hz), 138.2 (d,  $J = 13.2$  Hz), 135.2 (d,  $J = 3.9$  Hz), 132.8 (d,  $J = 2.8$  Hz), 132.4 (d,  $J = 104.9$  Hz), 132.0 (d,  $J = 9.9$  Hz), 129.7 (d,  $J = 1.7$  Hz), 128.4 (d,  $J = 10.4$  Hz), 128.2 (d,  $J = 13.7$  Hz), 122.4 (d,  $J = 5.0$  Hz), 21.2, 20.9;  **$^{31}\text{P}$  NMR** (121.5 MHz,  $\text{CDCl}_3$ )  $\delta$  42.00; **HRMS** (ESI) calculated for  $\text{C}_{21}\text{H}_{22}\text{OPS}$   $[\text{M}+\text{H}]^+$   $m/z$  353.1123, found 353.1119.

***S-p*-tolyl di-*o*-tolylphosphinothioate (**3ad**)<sup>[3]</sup>**

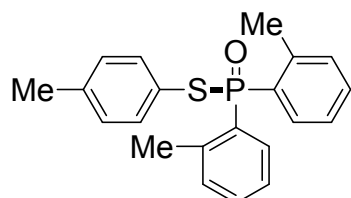

According to **GP1** with 4-methylbenzenethiol **1a** (74.5 mg, 0.6 mmol, 2.0 equiv), and di-*o*-tolylphosphine oxide **2d** (70.5 mg, 0.3 mmol, 1.0 equiv). The crude reaction mixture was purified by flash silica gel column chromatography (petroleum

ether/EtOAc = 3/1) to afford the desired product **3ad** as white solid (56.2 mg, 53%). According to **GP2** with 1,2-di-*p*-tolylldisulfane **4a** (45.0 mg, 0.18 mmol, 0.6 equiv) and di-*o*-tolylphosphine oxide **2d** (71.0 mg, 0.3 mmol, 1.0 equiv). The crude reaction mixture was purified by flash silica gel column chromatography (petroleum ether/EtOAc = 3/1) to afford the desired product **3ad** as white solid (48.8 mg, 46%). Mp: 99-101 °C; **<sup>1</sup>H NMR** (300 MHz, CDCl<sub>3</sub>) δ 7.82 (d, *J* = 7.8 Hz, 1H), 7.77 (d, *J* = 7.5 Hz, 1H), 7.40-7.33 (m, 4H), 7.23-7.16 (m, 4H), 7.02 (d, *J* = 7.5 Hz, 2H), 2.40 (s, 6H), 2.27 (s, 3H); **<sup>13</sup>C NMR** (75 MHz, CDCl<sub>3</sub>) δ 141.9 (d, *J* = 9.9 Hz), 139.0 (d, *J* = 2.2 Hz), 135.6 (d, *J* = 3.8 Hz), 132.7 (d, *J* = 11.5 Hz), 132.0 (d, *J* = 3.3 Hz), 131.8 (d, *J* = 12.1 Hz), 131.6 (d, *J* = 101.7 Hz), 129.8 (d, *J* = 1.7 Hz), 125.4 (d, *J* = 13.2 Hz), 122.4 (d, *J* = 5.0 Hz), 21.3 (d, *J* = 3.8 Hz), 21.1; **<sup>31</sup>P NMR** (121.5 MHz, CDCl<sub>3</sub>) δ 43.77; **HRMS** (ESI) calculated for C<sub>21</sub>H<sub>22</sub>OPS [M+H]<sup>+</sup> *m/z* 353.1123, found 353.1117.

***S*-*p*-tolyl bis(4-(*tert*-butyl)phenyl)phosphinothioate (**3ae**)<sup>[3]</sup>**

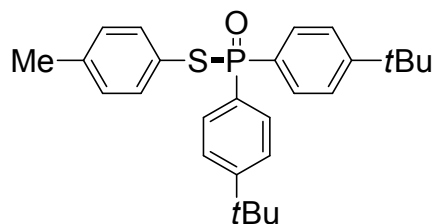

According to **GP1** with 4-methylbenzenethiol **1a** (74.9 mg, 0.6 mmol, 2.0 equiv) and bis(4-(*tert*-butyl)phenyl)phosphine oxide **2e** (95.6 mg, 0.3 mmol, 1.0 equiv). The crude reaction mixture was purified by flash silica gel column chromatography (petroleum ether/EtOAc = 3/1) to afford the desired product **3ae** as white solid (95.4 mg, 73%). According to **GP2** with 1,2-di-*p*-tolylldisulfane **4a** (44.6 mg, 0.18 mmol, 0.6 equiv) and bis(4-(*tert*-butyl)phenyl)phosphine oxide **2e** (94.7 mg, 0.3 mmol, 1.0 equiv). The crude reaction mixture was purified by flash silica gel column chromatography (petroleum ether/EtOAc = 3/1) to afford the desired product **3ae** as white solid (106.3 mg, 81%). Mp: 120-122 °C; **<sup>1</sup>H NMR** (300 MHz, CDCl<sub>3</sub>) δ 7.81-7.74 (m, 4H), 7.45-7.41 (m, 4H), 7.35-7.29 (m, 2H), 6.97 (d, *J* = 7.8 Hz, 2H), 2.22 (s, 3H), 1.29 (s, 18H); **<sup>13</sup>C NMR** (75 MHz, CDCl<sub>3</sub>) δ 155.6 (d, *J* = 2.8 Hz), 138.8 (d, *J* = 2.2 Hz), 135.2 (d, *J* = 3.3 Hz), 131.4 (d, *J* = 10.4 Hz), 129.7 (d, *J* = 1.7 Hz), 129.6 (d, *J* = 108.8 Hz), 125.4 (d, *J* = 13.2 Hz), 122.9 (d, *J* = 5.6 Hz), 34.9, 31.0, 21.0; **<sup>31</sup>P NMR** (121.5 MHz, CDCl<sub>3</sub>) δ 41.53; **HRMS** (ESI) calculated for C<sub>27</sub>H<sub>34</sub>OPS [M+H]<sup>+</sup> *m/z* 437.2062, found 437.2059.

***S*-*p*-tolyl bis(4-fluorophenyl)phosphinothioate (**3af**)<sup>[3]</sup>**

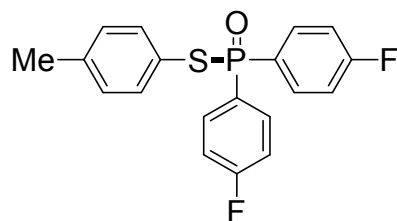

According to **GP1** with 4-methylbenzenethiol **1a** (74.3 mg, 0.6 mmol, 2.0 equiv) and bis(4-fluorophenyl)phosphine oxide **2f** (72.1 mg, 0.3 mmol, 1.0 equiv). The crude reaction mixture was purified by flash silica gel column chromatography (petroleum ether/EtOAc = 3/1) to afford the desired product **3af** as colorless oil (75.1 mg, 69%). According to **GP2** with 1,2-di-*p*-tolyl disulfane **4a** (44.8 mg, 0.18 mmol, 0.6 equiv) and bis(4-fluorophenyl)phosphine oxide **2f** (72.0 mg, 0.3 mmol, 1.0 equiv). The crude reaction mixture was purified by flash silica gel column chromatography (petroleum ether/EtOAc = 3/1) to afford the desired product **3af** as colorless oil (64.8 mg, 60%). <sup>1</sup>H NMR (300 MHz, CDCl<sub>3</sub>) δ 7.88-7.79 (m, 4H), 7.35-7.26 (m, 2H), 7.16-7.10 (m, 4H), 7.02 (d, *J* = 7.8 Hz, 2H), 2.26 (s, 3H); <sup>13</sup>C NMR (75 MHz, CDCl<sub>3</sub>) δ 165.2 (dd, *J* = 252.8, 3.3 Hz), 139.4 (d, *J* = 2.2 Hz), 135.2 (d, *J* = 3.9 Hz), 134.1 (dd, *J* = 11.9, 9.1 Hz), 130.0 (d, *J* = 1.1 Hz), 128.4 (dd, *J* = 110.4, 2.7 Hz), 121.8 (d, *J* = 5.5 Hz), 115.9 (dd, *J* = 21.4, 14.3 Hz), 21.1; <sup>31</sup>P NMR (121.5 MHz, CDCl<sub>3</sub>) δ 39.28; HRMS (ESI) calculated for C<sub>19</sub>H<sub>16</sub>F<sub>2</sub>OPS [M+H]<sup>+</sup> *m/z* 361.0622, found 361.0617.

***S*-*p*-tolyl bis(4-chlorophenyl)phosphinothioate (**3ag**)<sup>[3]</sup>**

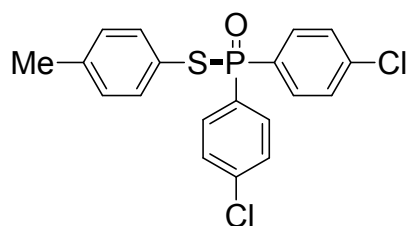

According to **GP1** with 4-methylbenzenethiol **1a** (74.6 mg, 0.6 mmol, 2.0 equiv) and bis(4-chlorophenyl)phosphine oxide **2g** (82.3 mg, 0.3 mmol, 1.0 equiv). The crude reaction mixture was purified by flash silica gel column chromatography (petroleum ether/EtOAc = 3/1) to afford the desired product **3ag** as white solid (71.2 mg, 60%). According to **GP2** with 1,2-di-*p*-tolyl disulfane **4a** (45.0 mg, 0.18 mmol, 0.6 equiv) and bis(4-chlorophenyl)phosphine oxide **2g** (82.5 mg, 0.3 mmol, 1.0 equiv). The crude reaction mixture was purified by flash silica gel column chromatography (petroleum ether/EtOAc = 3/1) to afford the desired product **3ag** as white solid (76.6

mg, 65%). Mp: 109-111 °C; **<sup>1</sup>H NMR** (300 MHz, CDCl<sub>3</sub>) δ 7.79-7.72 (m, 4H), 7.44-7.40 (m, 4H), 7.35-7.27 (m, 2H), 7.03 (d, *J* = 7.8 Hz, 2H), 2.27 (s, 3H); **<sup>13</sup>C NMR** (75 MHz, CDCl<sub>3</sub>) δ 139.5 (d, *J* = 2.7 Hz), 139.1 (d, *J* = 3.9 Hz), 135.2 (d, *J* = 3.9 Hz), 132.9 (d, *J* = 11.6 Hz), 130.9 (d, *J* = 108.2 Hz), 130.1 (d, *J* = 1.7 Hz), 128.9 (d, *J* = 13.7 Hz), 121.5 (d, *J* = 5.0 Hz), 21.1; **<sup>31</sup>P NMR** (121.5 MHz, CDCl<sub>3</sub>) δ 39.13; **HRMS** (ESI) calculated for C<sub>19</sub>H<sub>16</sub>Cl<sub>2</sub>OPS [M+H]<sup>+</sup> *m/z* 393.0031, found 393.0031.

***S-p*-tolyl bis(4-bromophenyl)phosphinothioate (3ah)<sup>[3]</sup>**

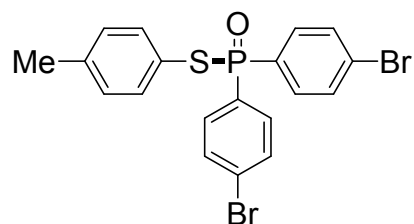

According to **GP1** with 4-methylbenzenethiol **1a** (75.3 mg, 0.6 mmol, 2.0 equiv) and bis(4-bromophenyl)phosphine oxide **2h** (109.0 mg, 0.3 mmol, 1.0 equiv). The crude reaction mixture was purified by flash silica gel column chromatography (petroleum ether/EtOAc = 3/1) to afford the desired product **3ah** as white solid (77.5 mg, 54%). According to **GP2** with 1,2-di-*p*-tolyl disulfane **4a** (45.1 mg, 0.18 mmol, 0.6 equiv) and bis(4-bromophenyl)phosphine oxide **2h** (108.5 mg, 0.3 mmol, 1.0 equiv). The crude reaction mixture was purified by flash silica gel column chromatography (petroleum ether/EtOAc = 3/1) to afford the desired product **3ah** as white solid (65.2 mg, 45%). Mp: 132-134 °C; **<sup>1</sup>H NMR** (300 MHz, CDCl<sub>3</sub>) δ 7.71-7.64 (m, 4H), 7.59-7.56 (m, 4H), 7.35-7.27 (m, 2H), 7.03 (d, *J* = 7.8 Hz, 2H), 2.26 (s, 3H); **<sup>13</sup>C NMR** (75 MHz, CDCl<sub>3</sub>) δ 139.6 (d, *J* = 2.2 Hz), 135.3 (d, *J* = 3.8 Hz), 133.0 (d, *J* = 11.0 Hz), 131.9 (d, *J* = 13.1 Hz), 131.4 (d, *J* = 107.7 Hz), 130.2 (d, *J* = 1.7 Hz), 127.8 (d, *J* = 3.9 Hz), 121.4 (d, *J* = 5.5 Hz), 21.1; **<sup>31</sup>P NMR** (121.5 MHz, CDCl<sub>3</sub>) δ 39.50; **HRMS** (ESI) calculated for C<sub>19</sub>H<sub>16</sub>Br<sub>2</sub>OPS [M+H]<sup>+</sup> *m/z* 480.9021, found 480.9023.

***S-p*-tolyl di([1,1'-biphenyl]-4-yl)phosphinothioate (3ai)<sup>[3]</sup>**

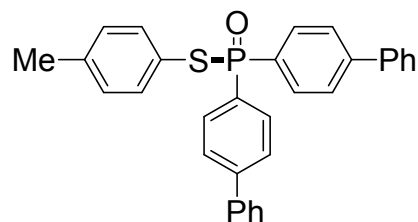

According to **GP1** with 4-methylbenzenethiol **1a** (74.5 mg, 0.6 mmol, 2.0 equiv) and

di([1,1'-biphenyl]-4-yl)phosphine oxide **2i** (107.0 mg, 0.3 mmol, 1.0 equiv). The crude reaction mixture was purified by flash silica gel column chromatography (petroleum ether/EtOAc = 3/1) to afford the desired product **3ai** as white solid (106.4 mg, 74%). According to **GP2** with 1,2-di-*p*-tolylldisulfane **4a** (45.1 mg, 0.18 mmol, 0.6 equiv) and di([1,1'-biphenyl]-4-yl)phosphine oxide **2i** (106.7 mg, 0.3 mmol, 1.0 equiv). The crude reaction mixture was purified by flash silica gel column chromatography (petroleum ether/EtOAc = 3/1) to afford the desired product **3ai** as white solid (112.2 mg, 78%). Mp: 125-127 °C; **<sup>1</sup>H NMR** (300 MHz, CDCl<sub>3</sub>) δ 7.99-7.92 (m, 4H), 7.65-7.61 (m, 4H), 7.55-7.53 (m, 4H), 7.41-7.30 (m, 8H), 6.98 (d, *J* = 7.8 Hz, 2H), 2.19 (s, 3H); **<sup>13</sup>C NMR** (75 MHz, CDCl<sub>3</sub>) δ 144.8 (d, *J* = 2.8 Hz), 139.6, 139.0 (d, *J* = 2.3 Hz), 135.2 (d, *J* = 3.3 Hz), 132.0 (d, *J* = 10.4 Hz), 130.5, 129.9 (d, *J* = 1.7 Hz), 128.8, 128.1, 127.1, 127.0 (d, *J* = 10.4 Hz), 122.3 (d, *J* = 5.0 Hz), 21.0; **<sup>31</sup>P NMR** (121.5 MHz, CDCl<sub>3</sub>) δ 41.09; **HRMS** (ESI) calculated for C<sub>31</sub>H<sub>26</sub>OPS [M+H]<sup>+</sup> *m/z* 477.1436, found 477.1435.

***S-p*-tolyl di(naphthalen-2-yl)phosphinothioate (**3aj**)<sup>[3]</sup>**

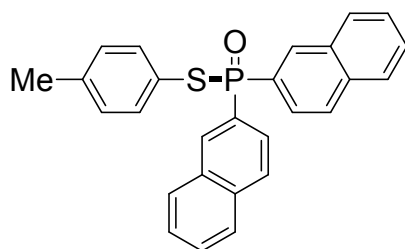

According to **GP1** with 4-methylbenzenethiol **1a** (75.0 mg, 0.6 mmol, 2.0 equiv) and di(naphthalen-2-yl)phosphine oxide **2j** (91.0 mg, 0.3 mmol, 1.0 equiv). The crude reaction mixture was purified by flash silica gel column chromatography (petroleum ether/EtOAc = 3/1) to afford the desired product **3aj** as colorless oil (90.9 mg, 71%). According to **GP2** with 1,2-di-*p*-tolylldisulfane **4a** (44.4 mg, 0.18 mmol, 0.6 equiv) and di(naphthalen-2-yl)phosphine oxide **2j** (91.0 mg, 0.3 mmol, 1.0 equiv). The crude reaction mixture was purified by flash silica gel column chromatography (petroleum ether/EtOAc = 3/1) to afford the desired product **3aj** as colorless oil (95.7 mg, 75%). **<sup>1</sup>H NMR** (300 MHz, CDCl<sub>3</sub>) δ 8.48 (s, 1H), 8.43 (s, 1H), 7.90-7.82 (m, 8H), 7.59-7.49 (m, 4H), 7.41-7.35 (m, 2H), 6.95 (d, *J* = 8.1 Hz, 2H), 2.18 (s, 3H); **<sup>13</sup>C NMR** (75 MHz, CDCl<sub>3</sub>) δ 139.1 (d, *J* = 1.7 Hz), 135.3 (d, *J* = 3.8 Hz), 134.8 (d, *J* = 2.2 Hz), 133.9 (d, *J* = 9.3 Hz), 132.4 (d, *J* = 14.3 Hz), 129.9 (d, *J* = 1.1 Hz), 129.8 (d, *J* = 107.2 Hz), 129.0, 128.32, 128.30 (d, *J* = 13.2 Hz), 127.7, 126.9, 126.2 (d, *J* = 11.6 Hz), 122.2 (d, *J* = 4.9 Hz), 21.0; **<sup>31</sup>P NMR** (121.5 MHz, CDCl<sub>3</sub>) δ 41.53; **HRMS** (ESI)



calculated for C<sub>27</sub>H<sub>22</sub>OPS [M+H]<sup>+</sup> m/z 425.1123, found 425.1123.

***S*-*p*-tolyl butyl(phenyl)phosphinothioate (**3ak**)<sup>[3]</sup>**

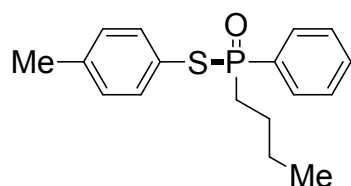

According to **GP1** with 4-methylbenzenethiol **1a** (74.4 mg, 0.6 mmol, 2.0 equiv) and butyl(phenyl)phosphine oxide **2k** (55.5 mg, 0.3 mmol, 1.0 equiv). The crude reaction mixture was purified by flash silica gel column chromatography (petroleum ether/EtOAc = 3/1) to afford the desired product **3ak** as colorless oil (63.2 mg, 69%). According to **GP2** with 1,2-di-*p*-tolyl disulfane **4a** (44.6 mg, 0.18 mmol, 0.6 equiv) and butyl(phenyl)phosphine oxide **2k** (54.8 mg, 0.3 mmol, 1.0 equiv). The crude reaction mixture was purified by flash silica gel column chromatography (petroleum ether/EtOAc = 3/1) to afford the desired product **3ak** as colorless oil (56.6 mg, 62%). <sup>1</sup>H NMR (300 MHz, CDCl<sub>3</sub>) δ 7.78-7.71 (m, 2H), 7.52-7.39 (m, 3H), 7.35-7.28 (m, 2H), 7.04 (d, *J* = 8.1 Hz, 2H), 2.28 (s, 3H), 2.24-2.04 (m, 2H), 1.68-1.47 (m, 2H), 1.38-1.26 (m, 2H), 0.85 (d, *J* = 7.2 Hz, 2H); <sup>13</sup>C NMR (75 MHz, CDCl<sub>3</sub>) δ 139.0 (d, *J* = 2.2 Hz), 135.3 (d, *J* = 3.3 Hz), 132.4 (d, *J* = 98.3 Hz), 131.9 (d, *J* = 2.8 Hz), 131.1 (d, *J* = 9.9 Hz), 129.9 (d, *J* = 1.7 Hz), 128.3 (d, *J* = 12.7 Hz), 122.2 (d, *J* = 5.5 Hz), 32.7 (d, *J* = 71.0 Hz), 24.2 (d, *J* = 4.4 Hz), 23.6 (d, *J* = 15.9 Hz), 21.0, 13.4; <sup>31</sup>P NMR (121.5 MHz, CDCl<sub>3</sub>) δ 45.29; HRMS (ESI) calculated for C<sub>17</sub>H<sub>22</sub>OPS [M+H]<sup>+</sup> m/z 305.1123, found 305.1115.

***S*-*p*-tolyl benzyl(phenyl)phosphinothioate (**3al**)**

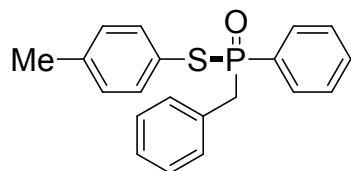

According to **GP1** with 4-methylbenzenethiol **1a** (74.3 mg, 0.6 mmol, 2.0 equiv) and benzyl(phenyl)phosphine oxide **2l** (65.7 mg, 0.3 mmol, 1.0 equiv). The crude reaction mixture was purified by flash silica gel column chromatography (petroleum ether/EtOAc = 3/1) to afford the desired product **3al** as white solid (81.8 mg, 81%). According to **GP2** with 1,2-di-*p*-tolyl disulfane **4a** (45.1 mg, 0.18 mmol, 0.6 equiv) and benzyl(phenyl)phosphine oxide **2l** (66.0 mg, 0.3 mmol, 1.0 equiv). The crude

reaction mixture was purified by flash silica gel column chromatography (petroleum ether/EtOAc = 3/1) to afford the desired product **3al** as white solid (75.7 mg, 75%). Mp: 134-136 °C. <sup>1</sup>H NMR (300 MHz, CDCl<sub>3</sub>) δ 7.66-7.60 (m, 2H), 7.41-7.33 (m, 5H), 7.21-7.12 (m, 3H), 7.07-7.00 (m, 4H), 3.61-3.46 (m, 2H), 2.24 (s, 3H); <sup>13</sup>C NMR (75 MHz, CDCl<sub>3</sub>) δ 138.9 (d, *J* = 1.9 Hz), 135.1 (d, *J* = 2.9 Hz), 131.9 (d, *J* = 2.9 Hz), 131.4 (d, *J* = 8.8 Hz), 131.3 (d, *J* = 99.3 Hz), 130.6 (d, *J* = 8.8 Hz), 129.9 (d, *J* = 5.9 Hz), 129.8, 128.2 (d, *J* = 2.9 Hz), 128.0 (d, *J* = 12.8 Hz), 126.8 (d, *J* = 2.9 Hz), 121.9 (d, *J* = 4.9 Hz), 41.1 (d, *J* = 65.1 Hz), 20.9; <sup>31</sup>P NMR (202.5 MHz, CDCl<sub>3</sub>) δ 47.40; HRMS (ESI) calculated for C<sub>20</sub>H<sub>20</sub>OPS [M+H]<sup>+</sup> *m/z* 339.0967, found 339.0971.

***O*-ethyl *S*-*p*-tolyl phenylphosphonothioate (**3am**)**<sup>[3]</sup>

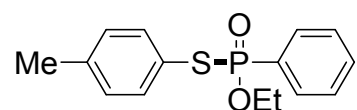

According to **GP1** with 4-methylbenzenethiol **1a** (74.6 mg, 0.6 mmol, 2.0 equiv) and ethyl phenylphosphinate **2m** (51.0 mg, 0.3 mmol, 1.0 equiv). The crude reaction mixture was purified by flash silica gel column chromatography (petroleum ether/EtOAc = 3/1) to afford the desired product **3am** as colorless oil (43.5 mg, 50%). According to **GP2** with 1,2-di-*p*-tolyl disulfane **4a** (45.1 mg, 0.18 mmol, 0.6 equiv) and ethyl phenylphosphinate **2m** (51.0 mg, 0.3 mmol, 1.0 equiv). The crude reaction mixture was purified by flash silica gel column chromatography (petroleum ether/EtOAc = 3/1) to afford the desired product **3am** as colorless oil (43.9 mg, 50%). <sup>1</sup>H NMR (300 MHz, CDCl<sub>3</sub>) δ 7.70-7.63 (m, 2H), 7.51-7.47 (m, 1H), 7.40-7.33 (m, 2H), 7.18-7.16 (m, 2H), 7.02-6.99 (m, 2H), 4.39-4.26 (m, 2H), 2.29 (s, 3H), 1.39 (d, *J* = 7.1 Hz, 3H); <sup>13</sup>C NMR (75 MHz, CDCl<sub>3</sub>) δ 139.1 (d, *J* = 3.3 Hz), 135.3 (d, *J* = 4.4 Hz), 132.3 (d, *J* = 3.3 Hz), 131.7 (d, *J* = 149.5 Hz), 131.4 (d, *J* = 10.5 Hz), 129.8 (d, *J* = 2.2 Hz), 128.1 (d, *J* = 14.8 Hz), 122.8 (d, *J* = 5.5 Hz), 62.3 (d, *J* = 7.1 Hz), 21.0, 16.2 (d, *J* = 6.5 Hz); <sup>31</sup>P NMR (121.5 MHz, CDCl<sub>3</sub>) δ 41.91; HRMS (ESI) calculated for C<sub>15</sub>H<sub>18</sub>O<sub>2</sub>PS [M+H]<sup>+</sup> *m/z* 293.0760, found 293.0758.

### Larger scale experiments

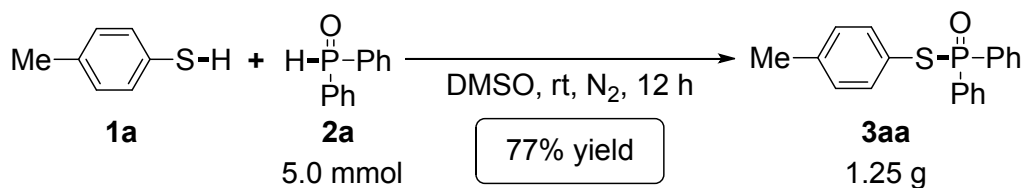

4-Methylbenzenethiol **1a** (1.24 g, 10.0 mmol, 2.0 equiv) and diphenylphosphine oxide **2a** (1.01g, 5.0 mmol, 1.0 equiv) were placed in a 100 mL round bottom flask. Then DMSO (25.0 mL) was added. The reaction mixture was stirred at room temperature under N<sub>2</sub> for 12 h, and the reaction was monitored with TLC. After the reaction was completed, H<sub>2</sub>O (50.0 mL) was added, and the mixture was extracted by EtOAc (3x50.0 mL). The combined organic layer was dried over anhydrous Na<sub>2</sub>SO<sub>4</sub>, filtered, and concentrated by rotary evaporation. The crude reaction mixture was purified by flash silica gel column chromatography (petroleum ether/EtOAc = 3/1) to afford the desired product **3aa** (1.25 g, 77%).

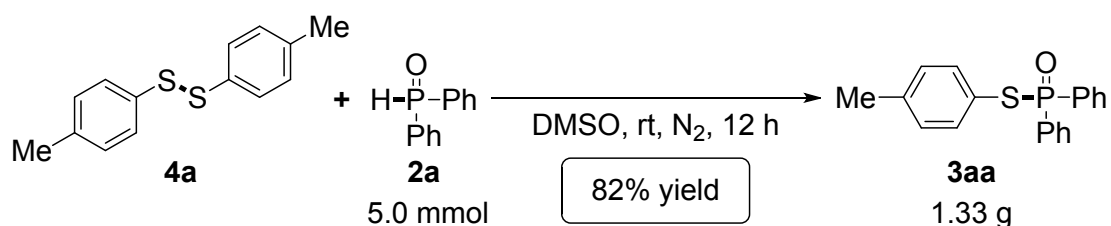

1,2-Di-*p*-tolyl disulfane **4a** (0.74 g, 3.0 mmol, 0.6 equiv) and diphenylphosphine oxide **2a** (1.01g, 5.0 mmol, 1.0 equiv) were placed in a 100 mL round bottom flask. Then DMSO (25.0 mL) was added. The reaction mixture was stirred at room temperature under N<sub>2</sub> for 12 h, and the reaction was monitored with TLC. After the reaction was completed, H<sub>2</sub>O (50.0 mL) was added, and the mixture was extracted by EtOAc (3x50.0 mL). The combined organic layer was dried over anhydrous Na<sub>2</sub>SO<sub>4</sub>, filtered, and concentrated by rotary evaporation. The crude reaction mixture was purified by flash silica gel column chromatography (petroleum ether/EtOAc = 3/1) to afford the desired product **3aa** (1.33 g, 82%).

### ***References:***

- [1] Li, S.; Chen, T.; Saga, Y.; Han, L.-B. *RSC Adv.* **2015**, *5*, 71544.
- [2] Wang, J.; Huang, X.; Ni, Z.; Wang, S.; Wu, J.; Pan, Y. *Green Chem.* **2015**, *17*, 314.
- [3] Sun, J.-G.; Yang, H.; Li, P.; Zhang, B. *Org. Lett.* **2016**, *18*, 5114.

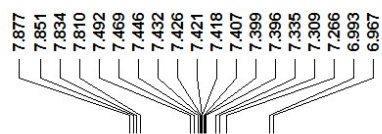

2.217

0.000

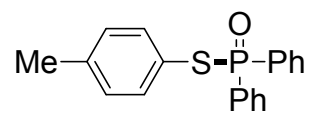

**3aa**

<sup>1</sup>H NMR (300 MHz, CDCl<sub>3</sub>)

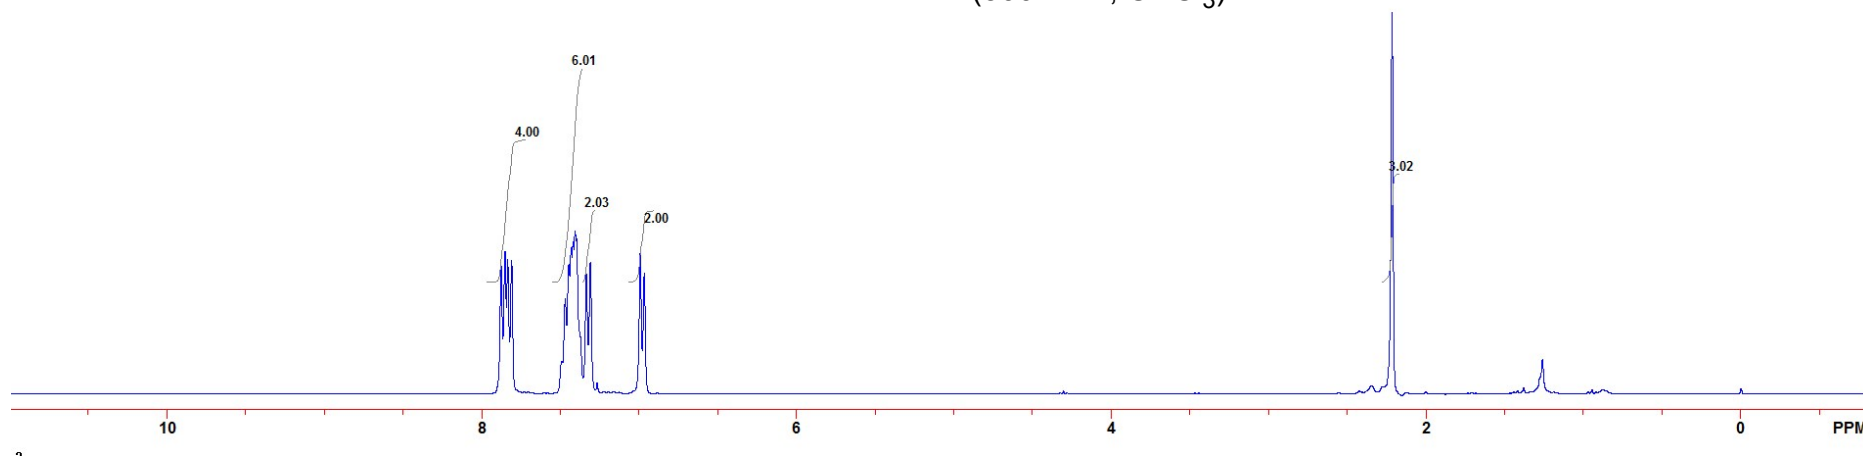

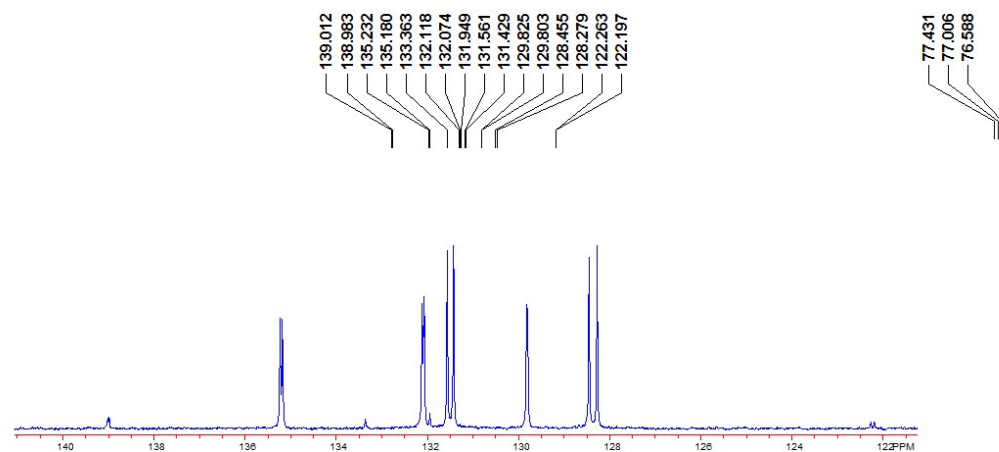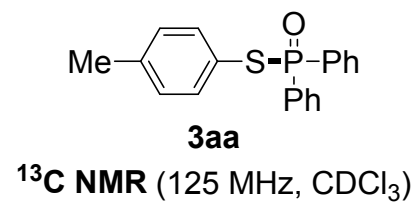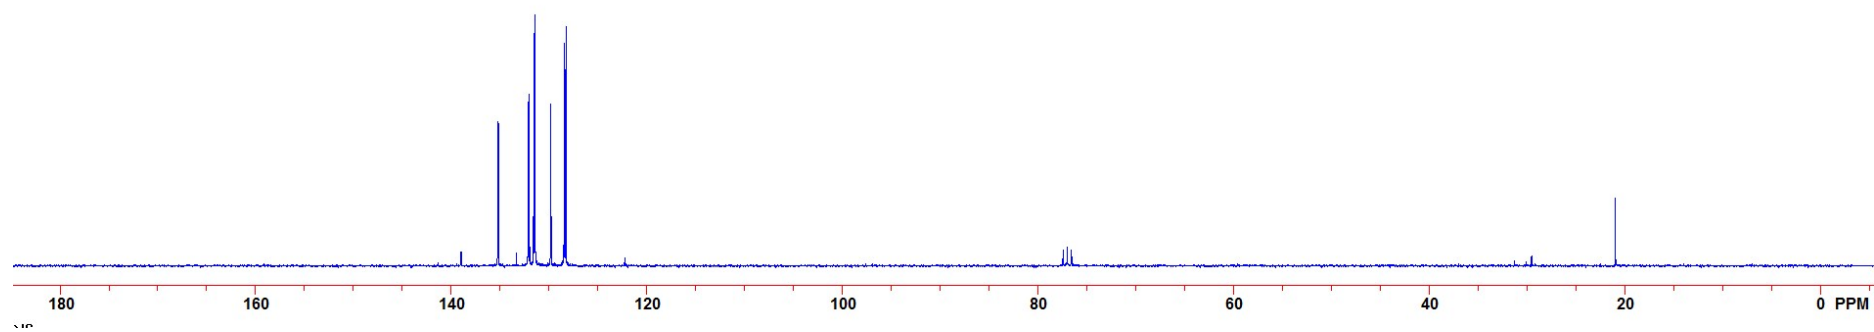

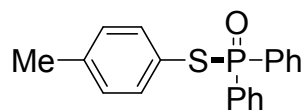

**3aa**

**$^{31}\text{P}$  NMR** (121.5 MHz,  $\text{CDCl}_3$ )

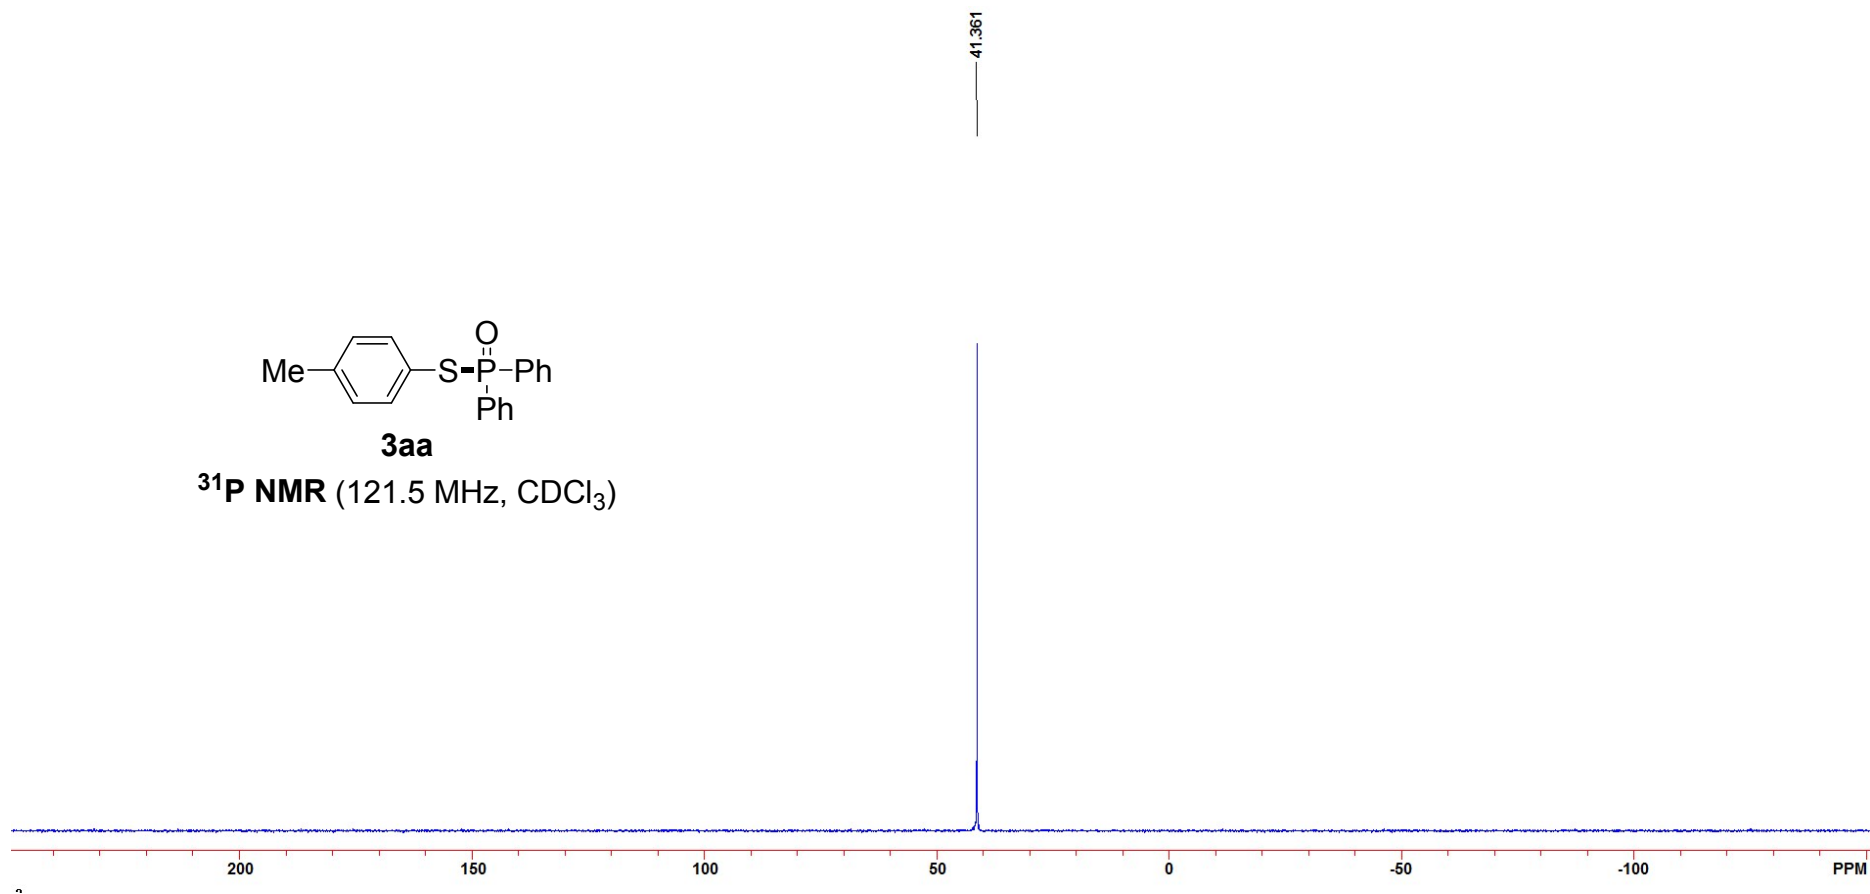

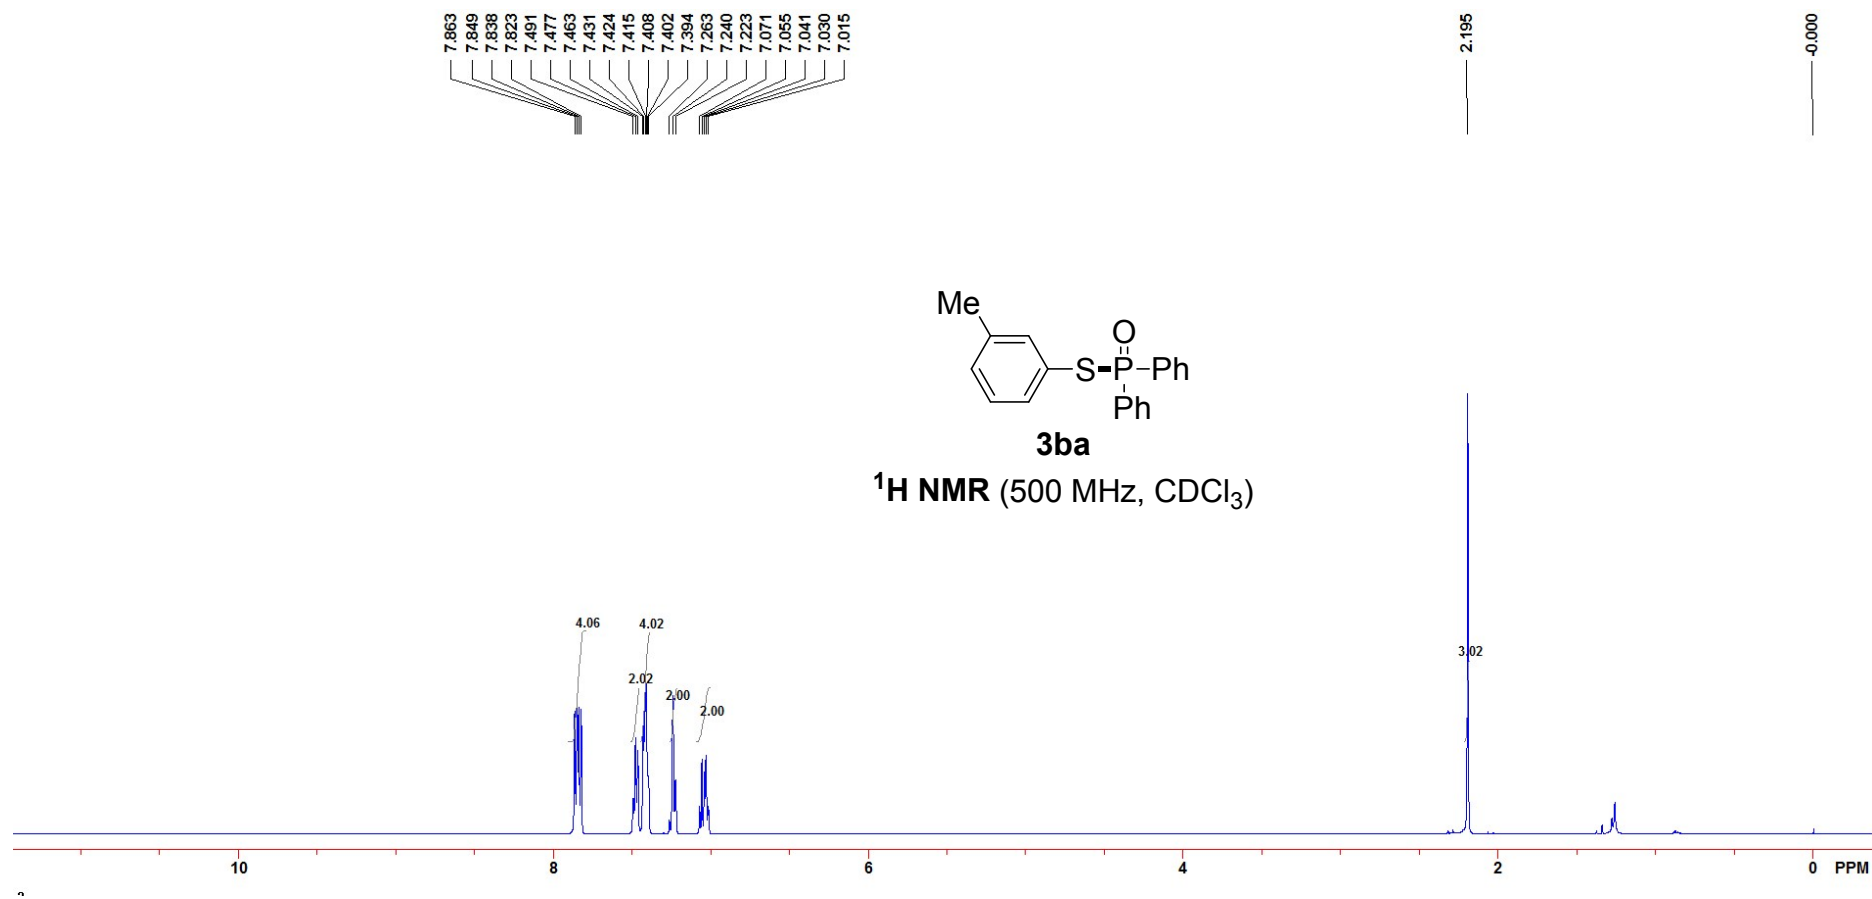



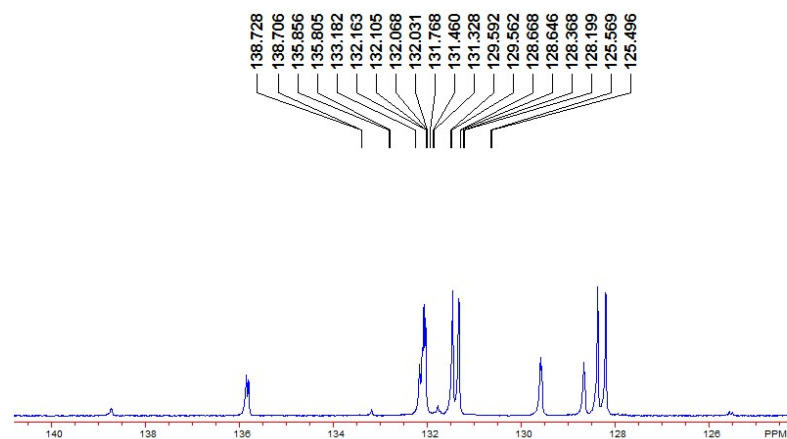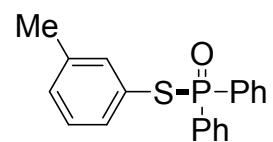

**3ba**

**<sup>13</sup>C NMR (75 MHz, CDCl<sub>3</sub>)**

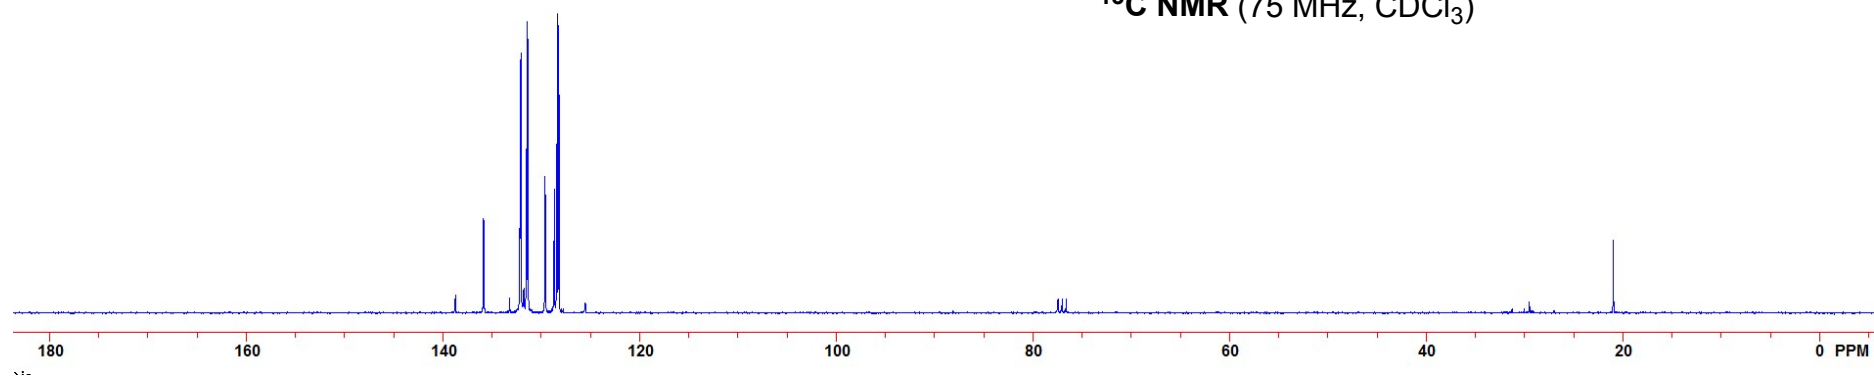

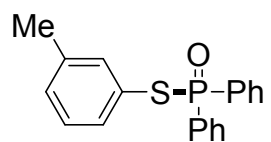

**3ba**

**$^{31}\text{P}$  NMR (121.5 MHz,  $\text{CDCl}_3$ )**

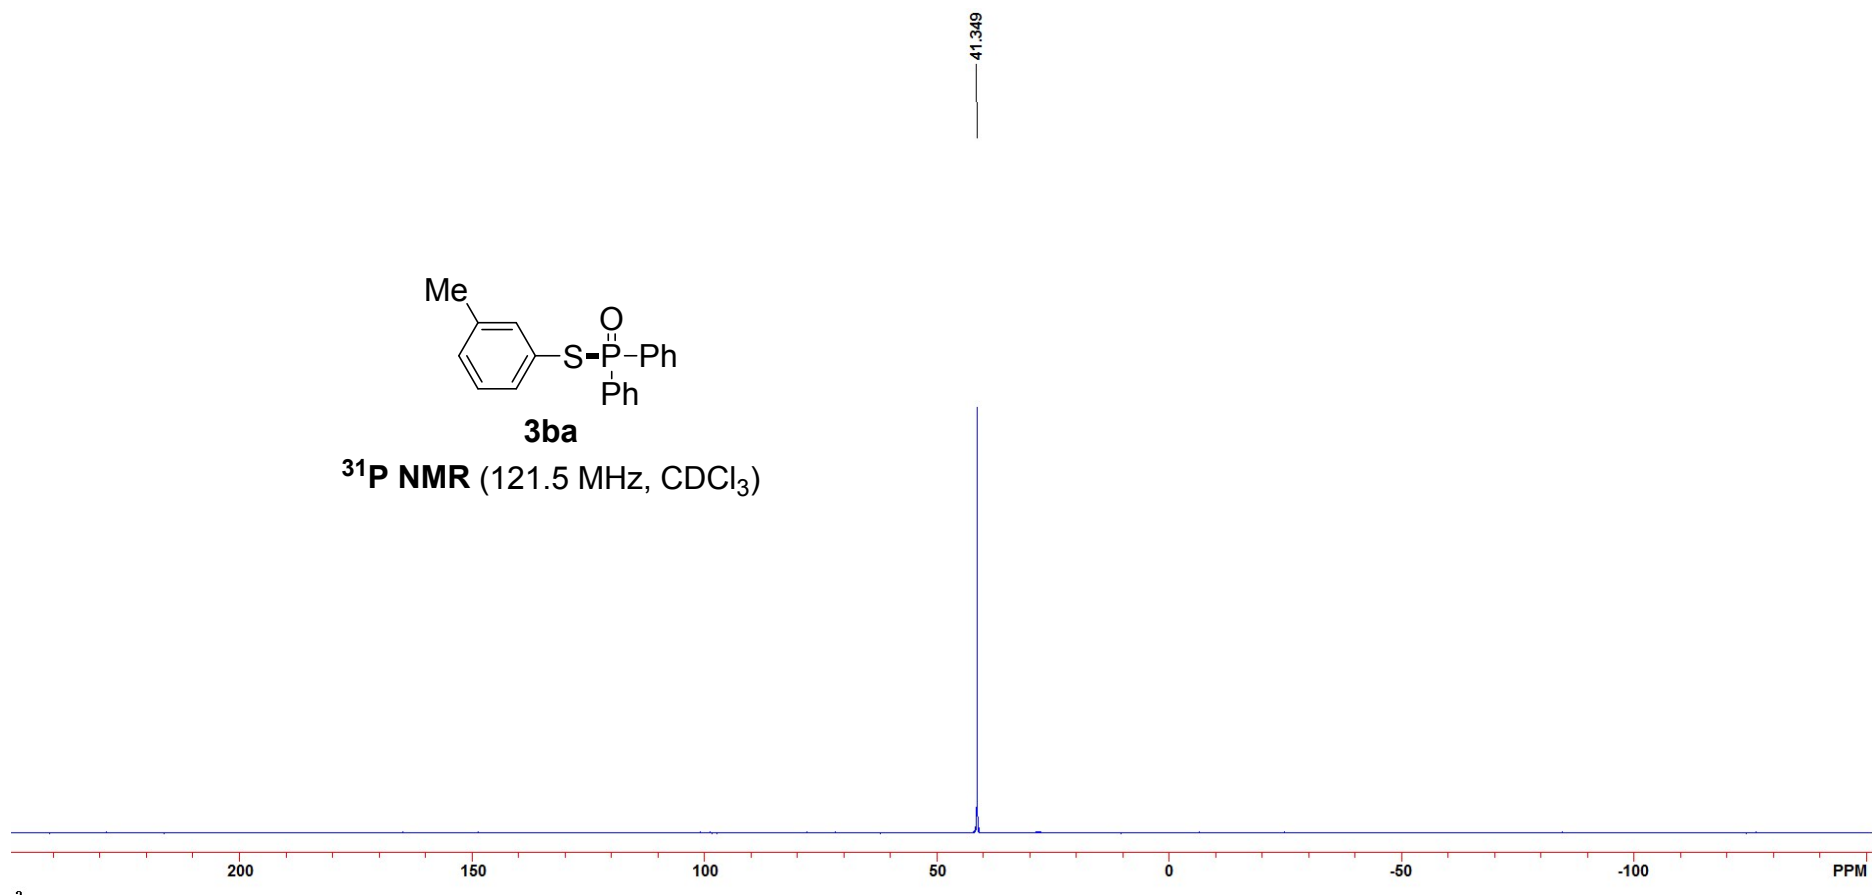

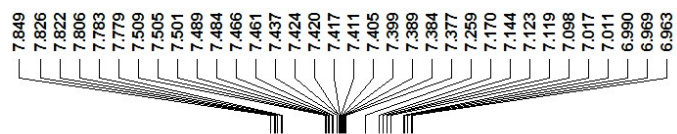

2.338

0.000

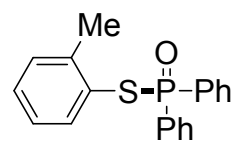

**3ca**

<sup>1</sup>H NMR (300 MHz, CDCl<sub>3</sub>)

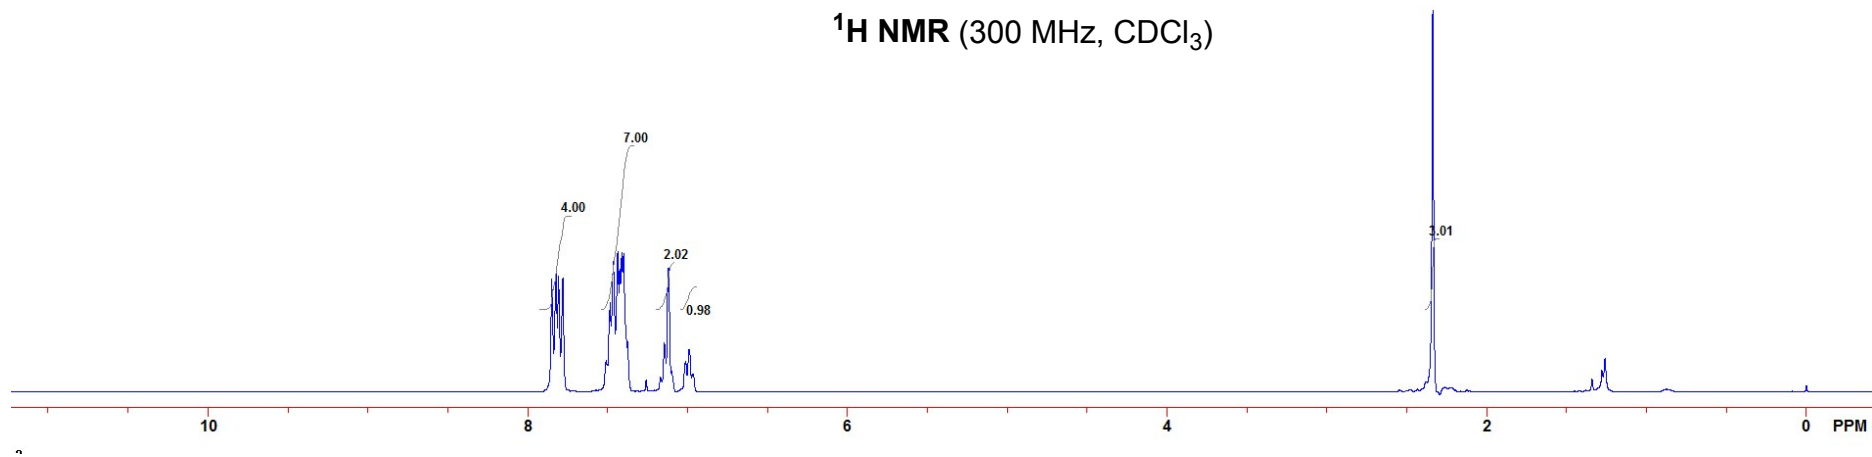

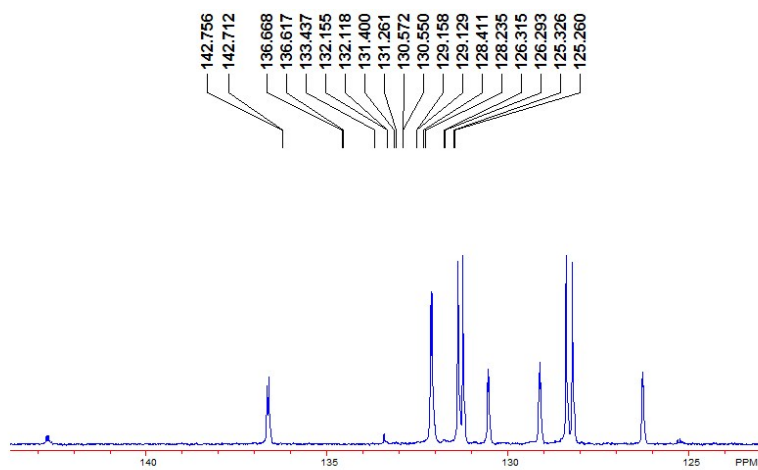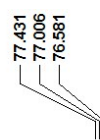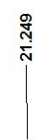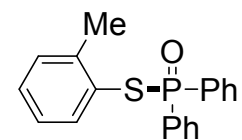

**3ca**

**$^{13}\text{C}$  NMR (125 MHz,  $\text{CDCl}_3$ )**

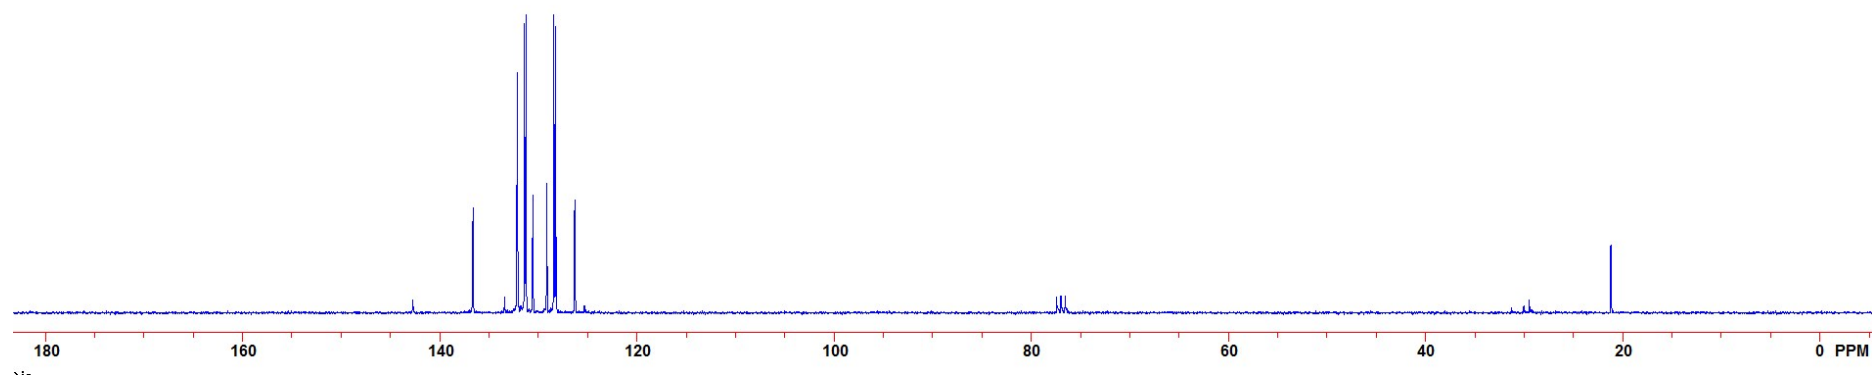

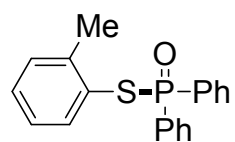

**3ca**

**$^{31}\text{P}$  NMR** (121.5 MHz,  $\text{CDCl}_3$ )

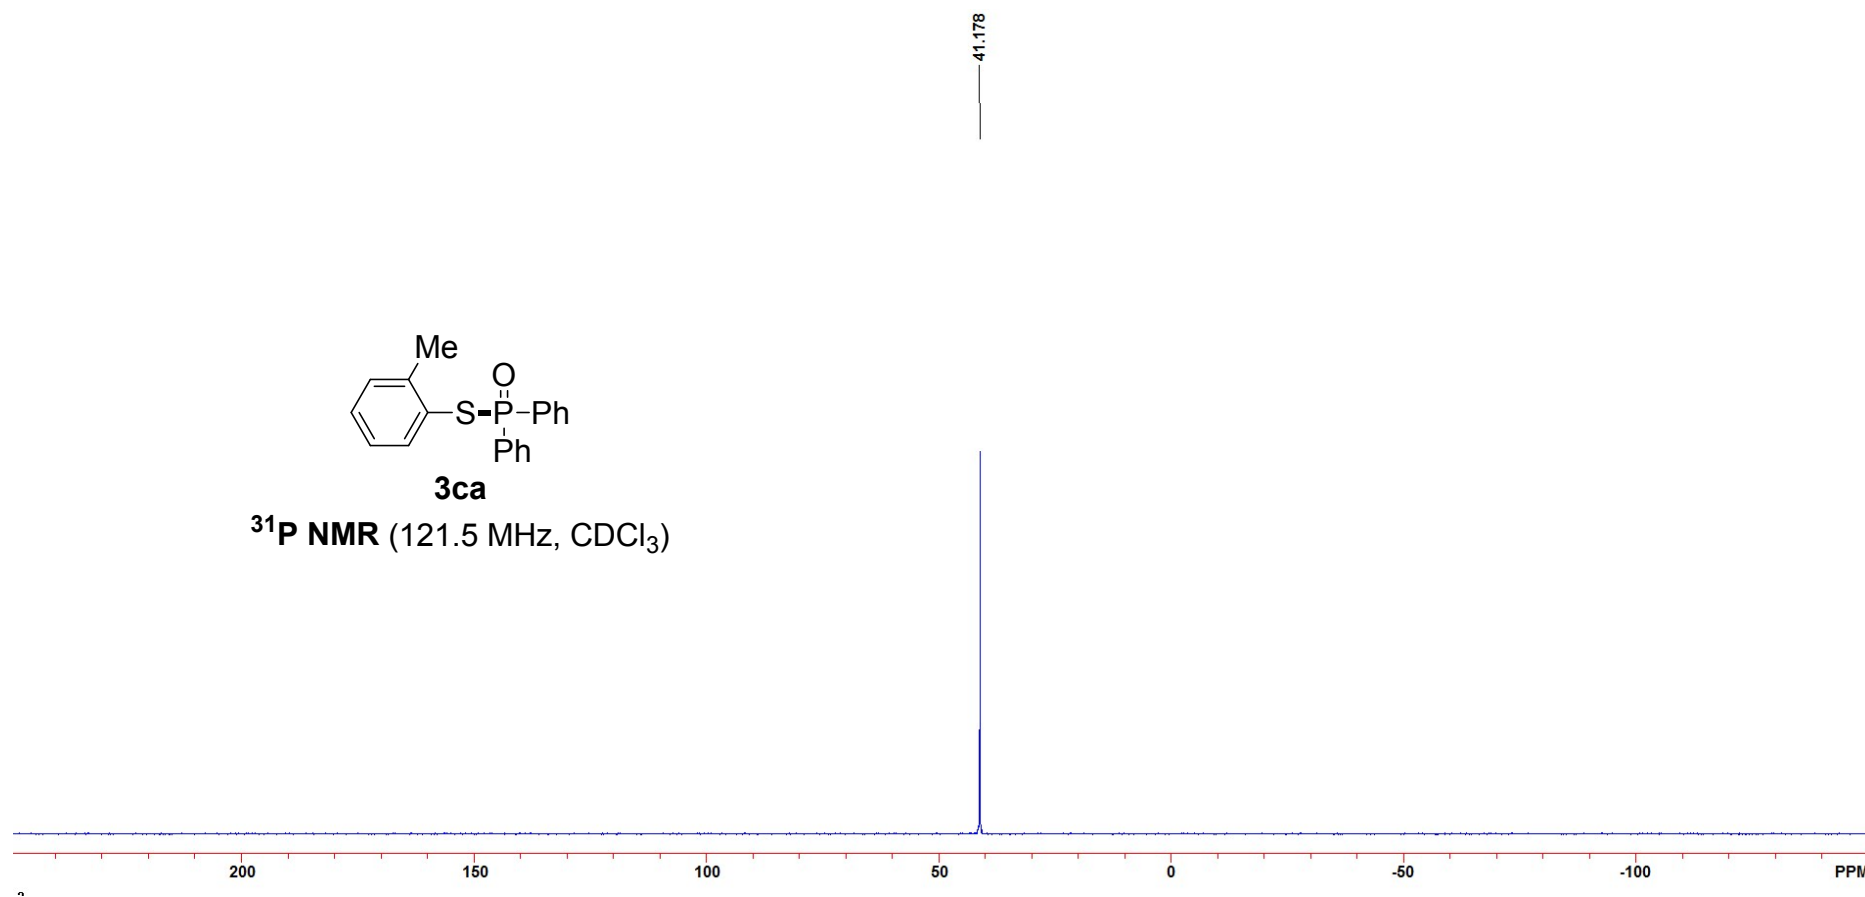

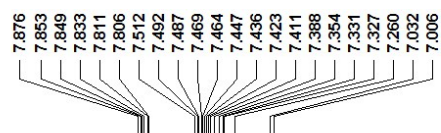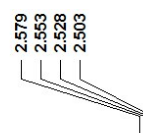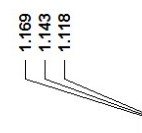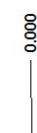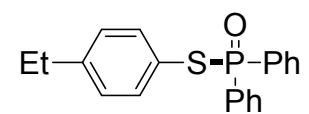

**3da**

<sup>1</sup>H NMR (300 MHz, CDCl<sub>3</sub>)

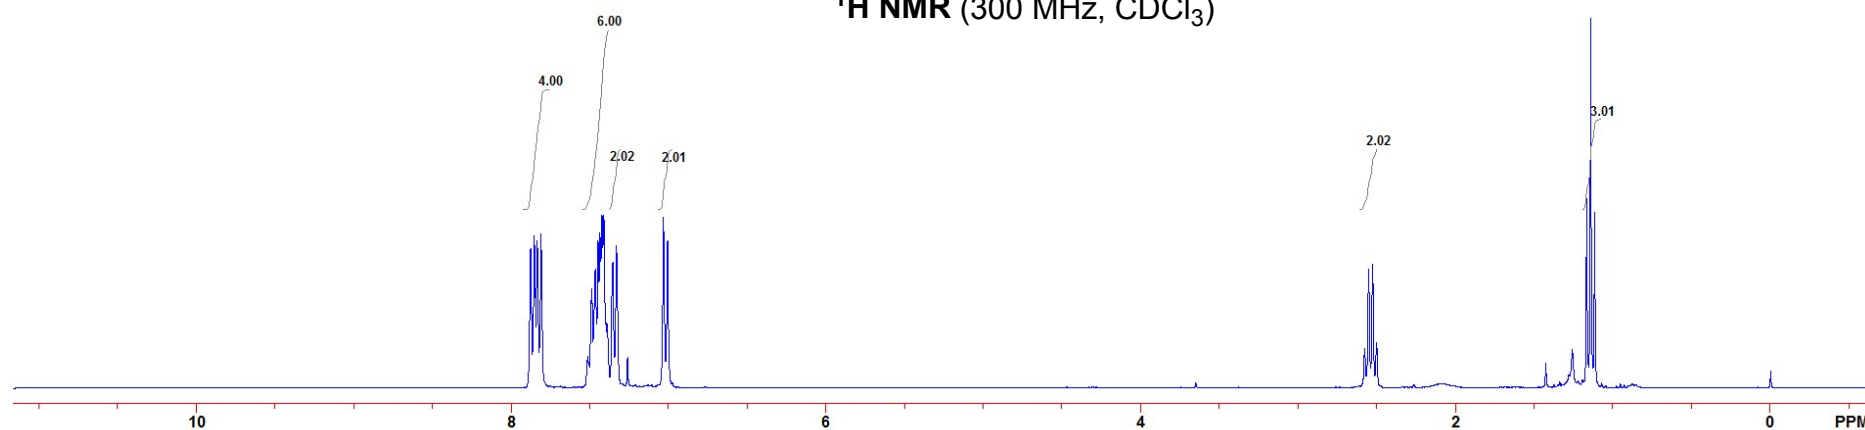

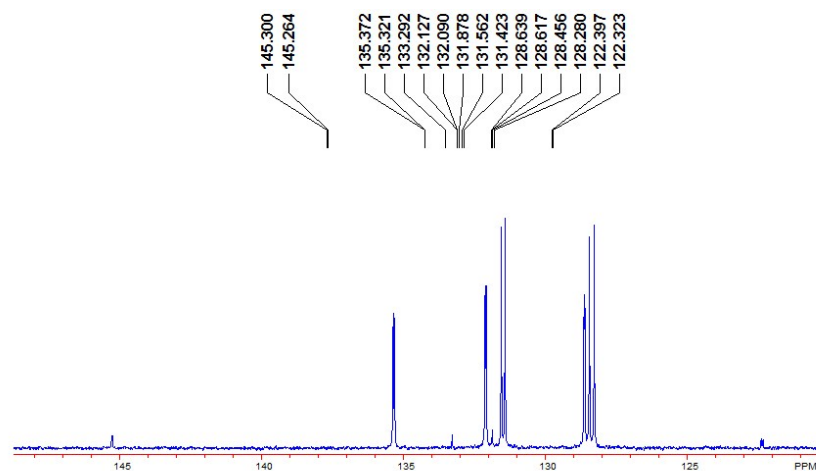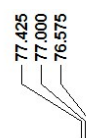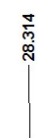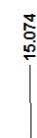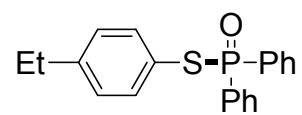

**3da**

<sup>13</sup>C NMR (75 MHz, CDCl<sub>3</sub>)

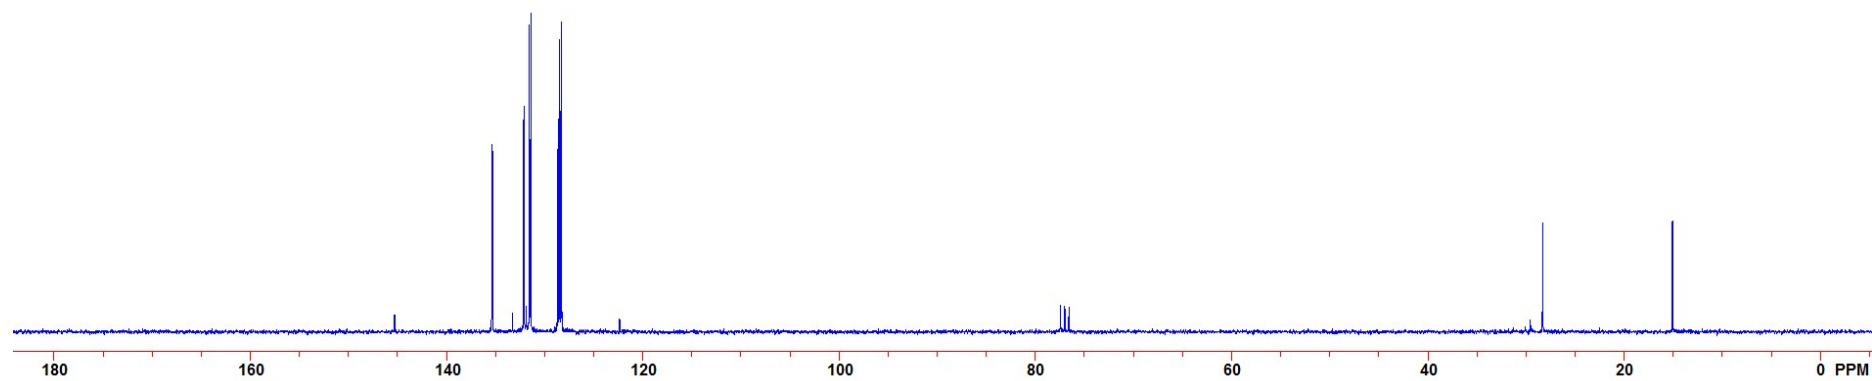

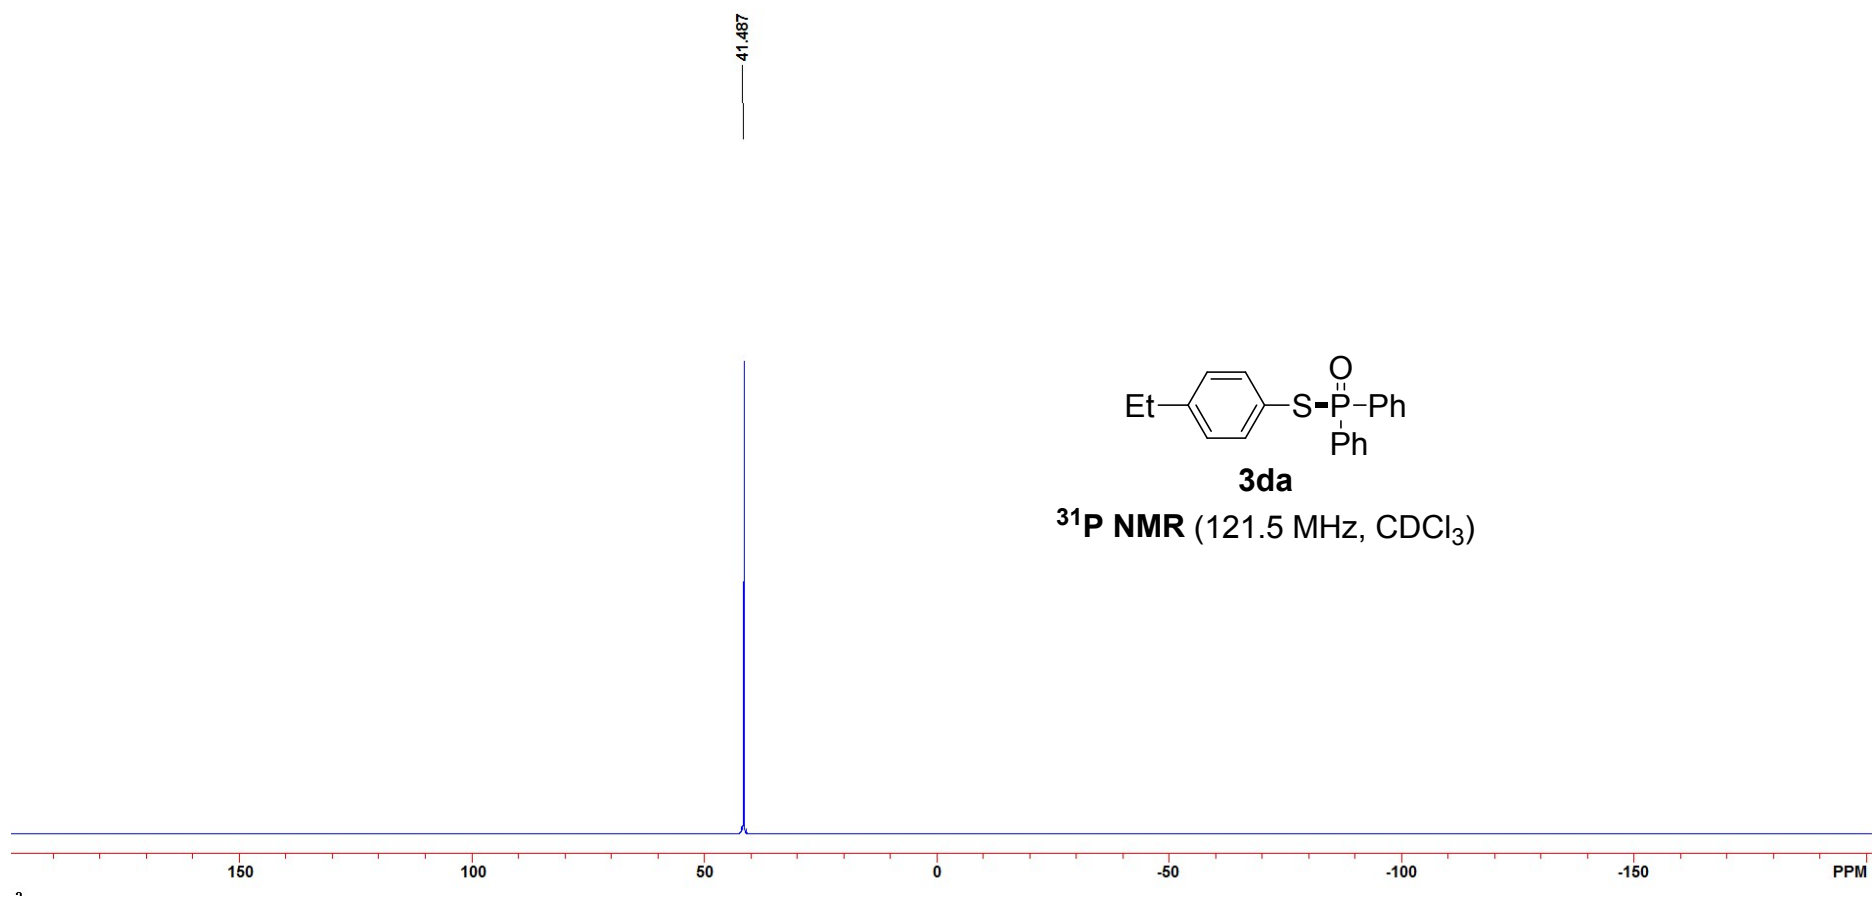



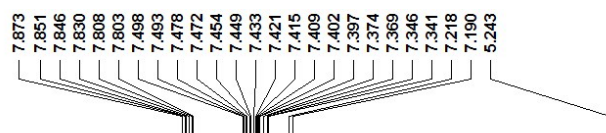

1.221

0.000

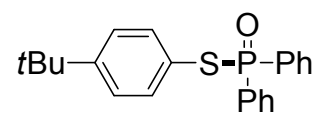

**3ea**

$^1\text{H}$  NMR (300 MHz,  $\text{CDCl}_3$ )

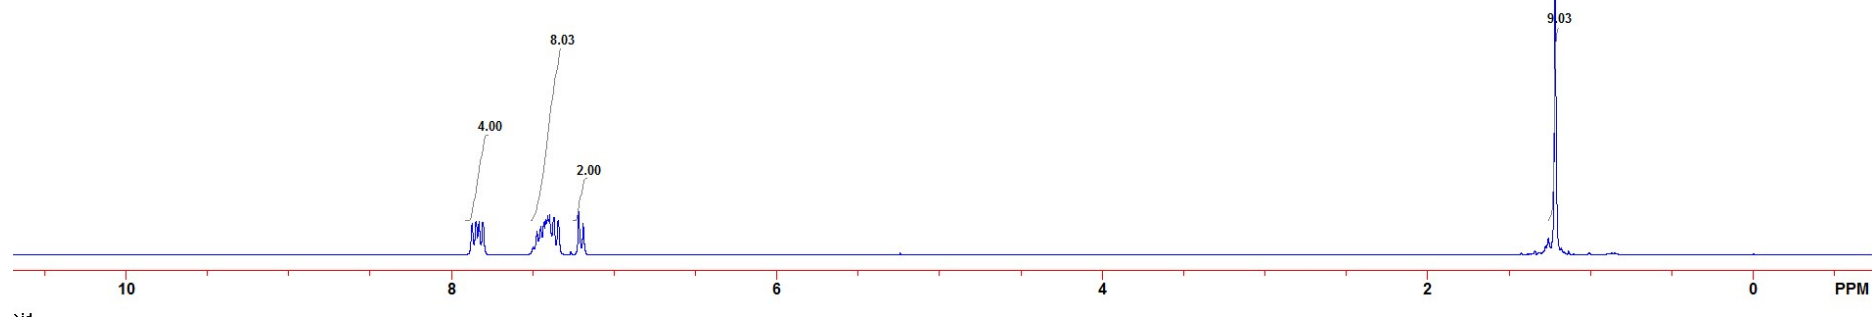

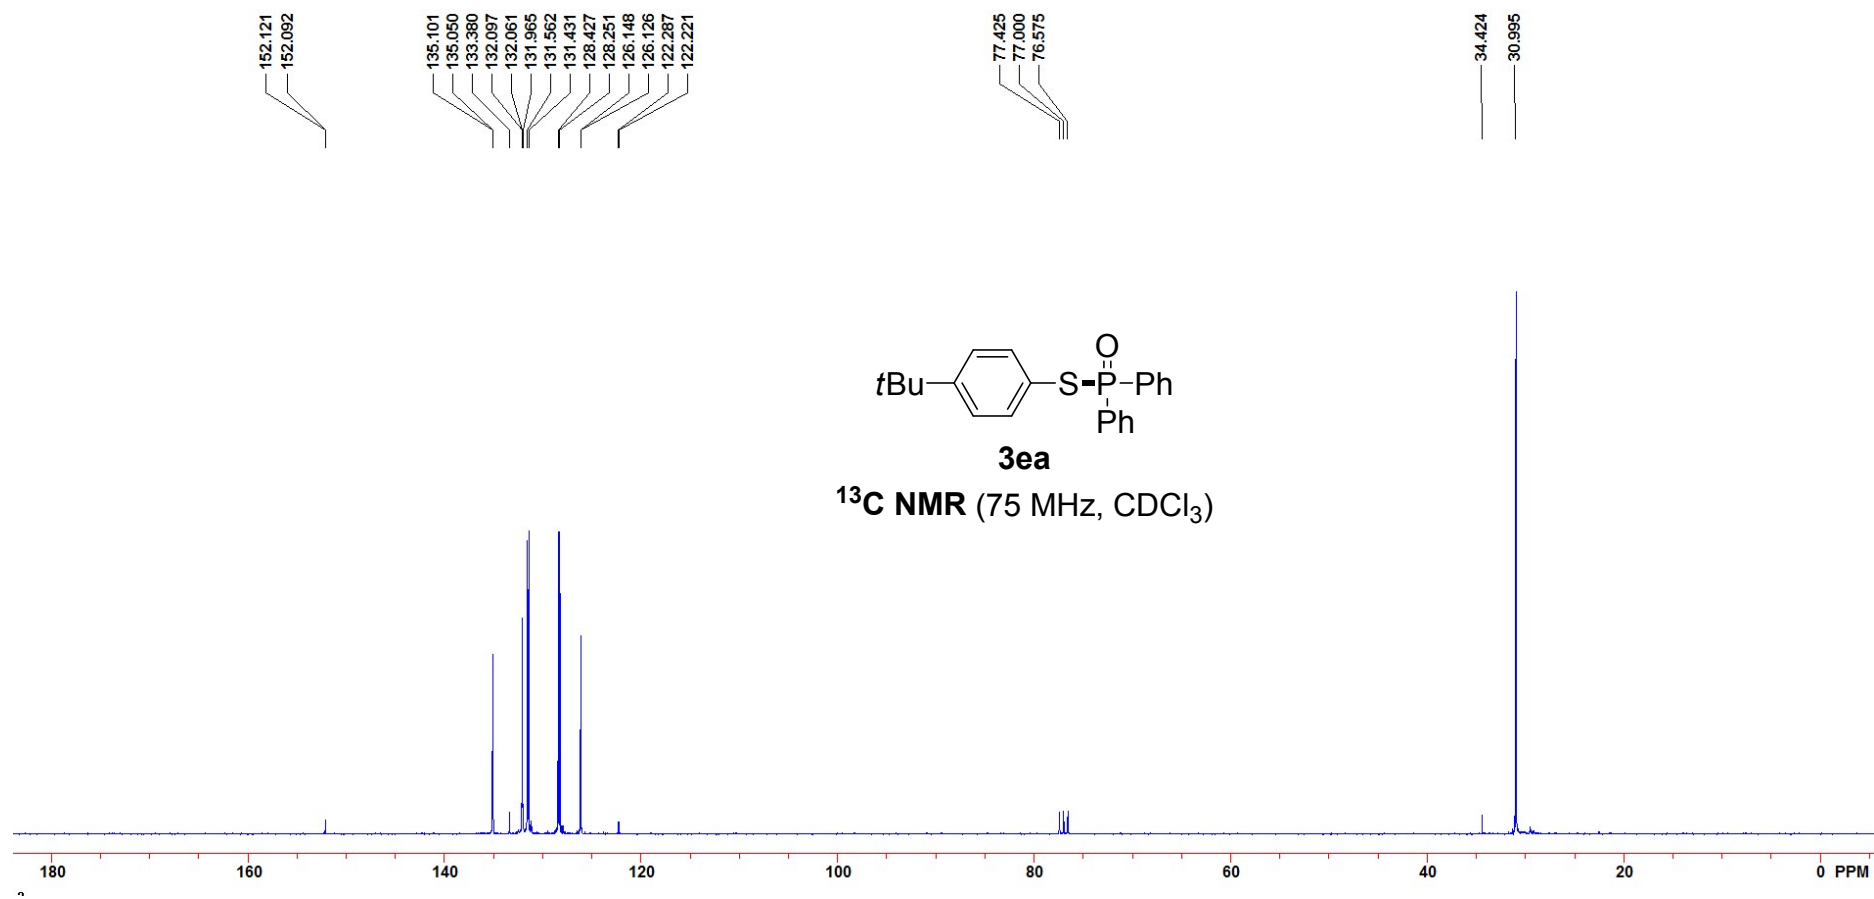

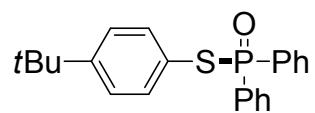

**3ea**

**$^{31}\text{P}$  NMR** (121.5 MHz,  $\text{CDCl}_3$ )

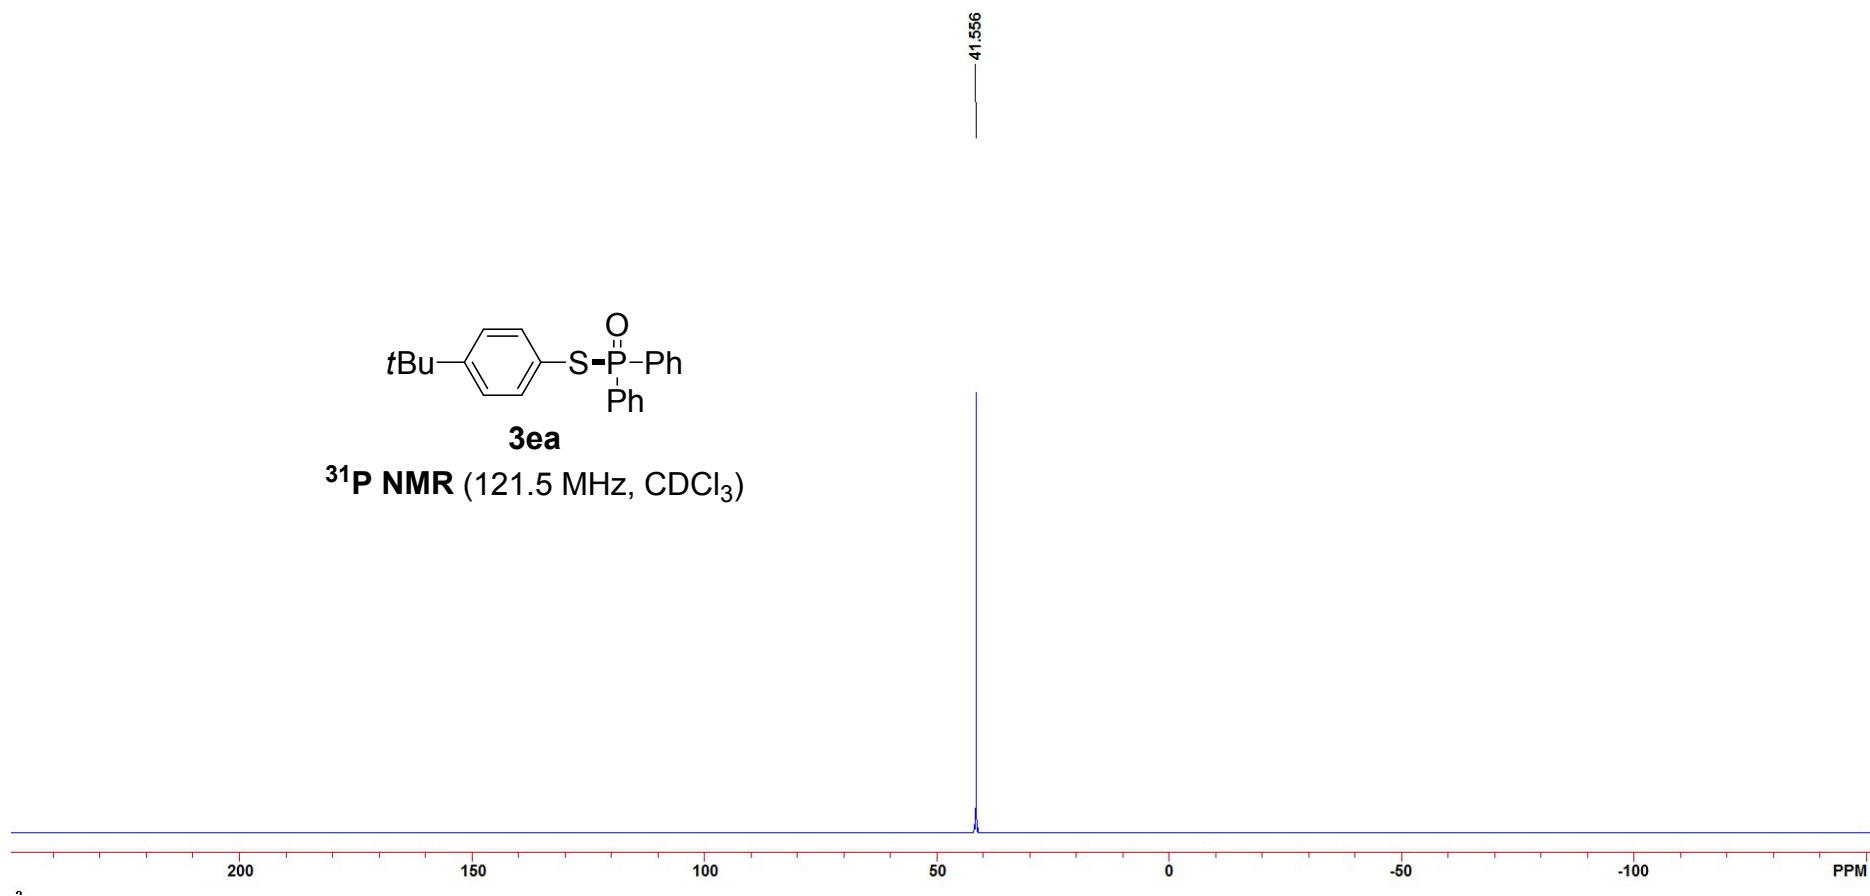

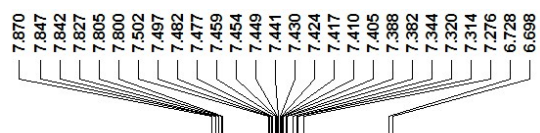

3.689

0.000

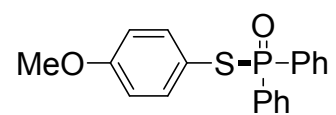

**3fa**

<sup>1</sup>H NMR (300 MHz, CDCl<sub>3</sub>)

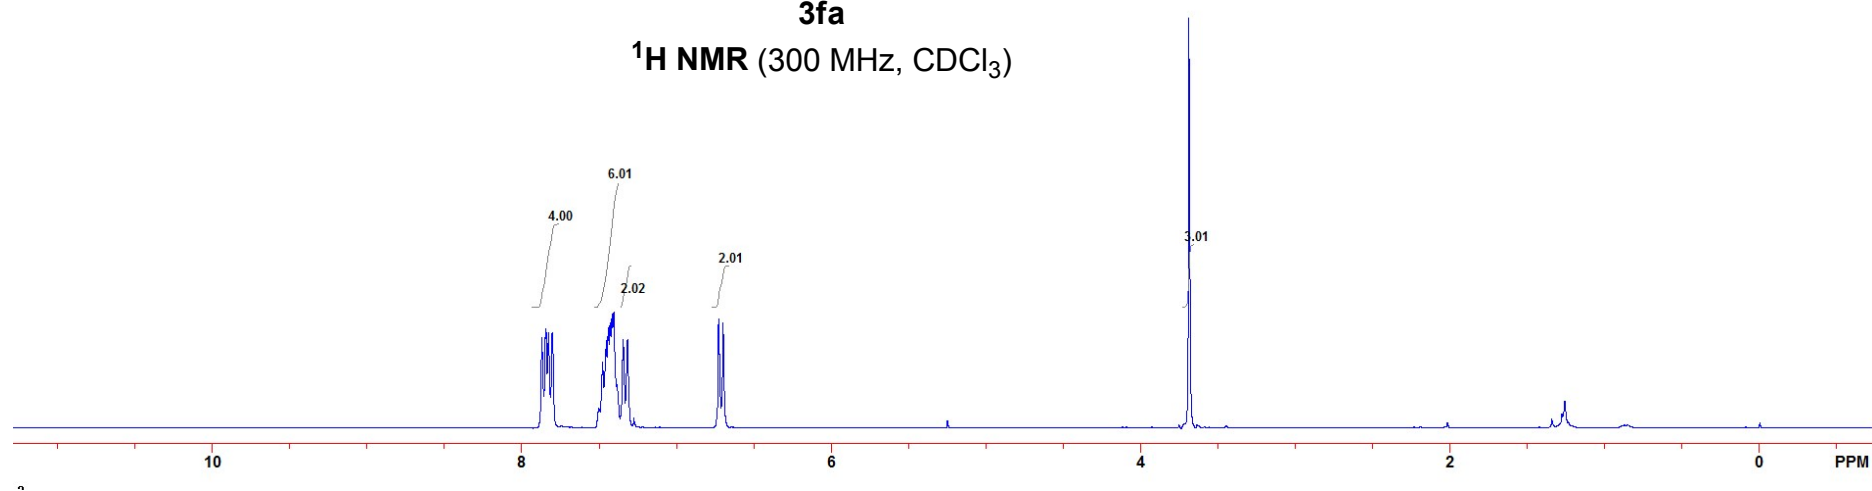

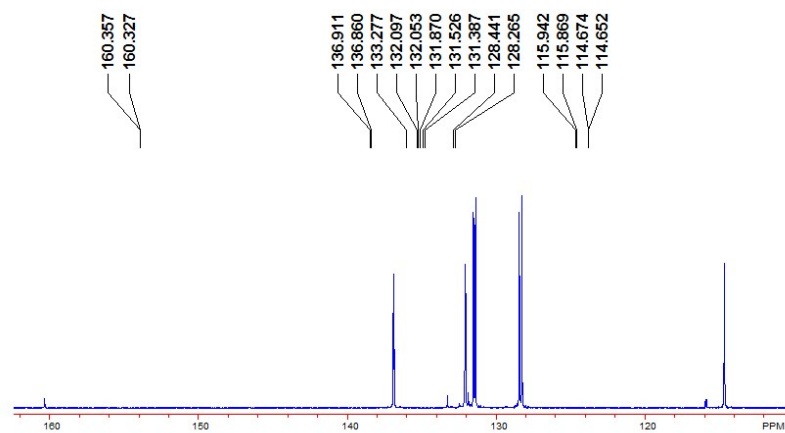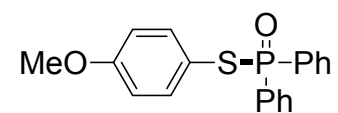

**3fa**

<sup>13</sup>C NMR (75 MHz, CDCl<sub>3</sub>)

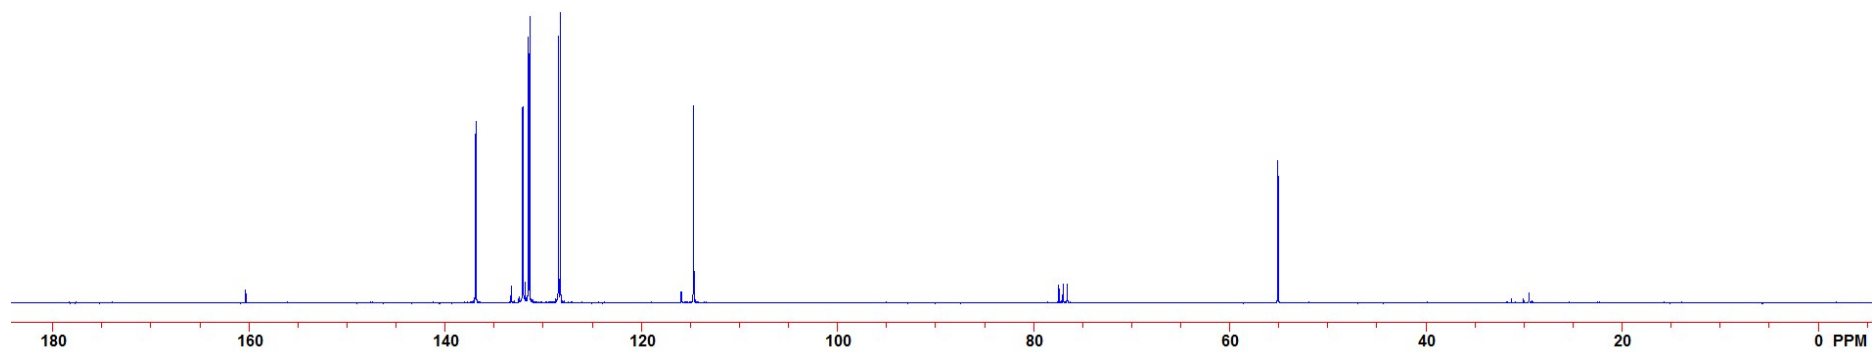

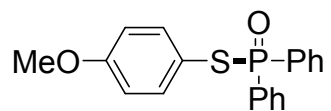

**3fa**

**$^{31}\text{P}$  NMR** (121.5 MHz,  $\text{CDCl}_3$ )

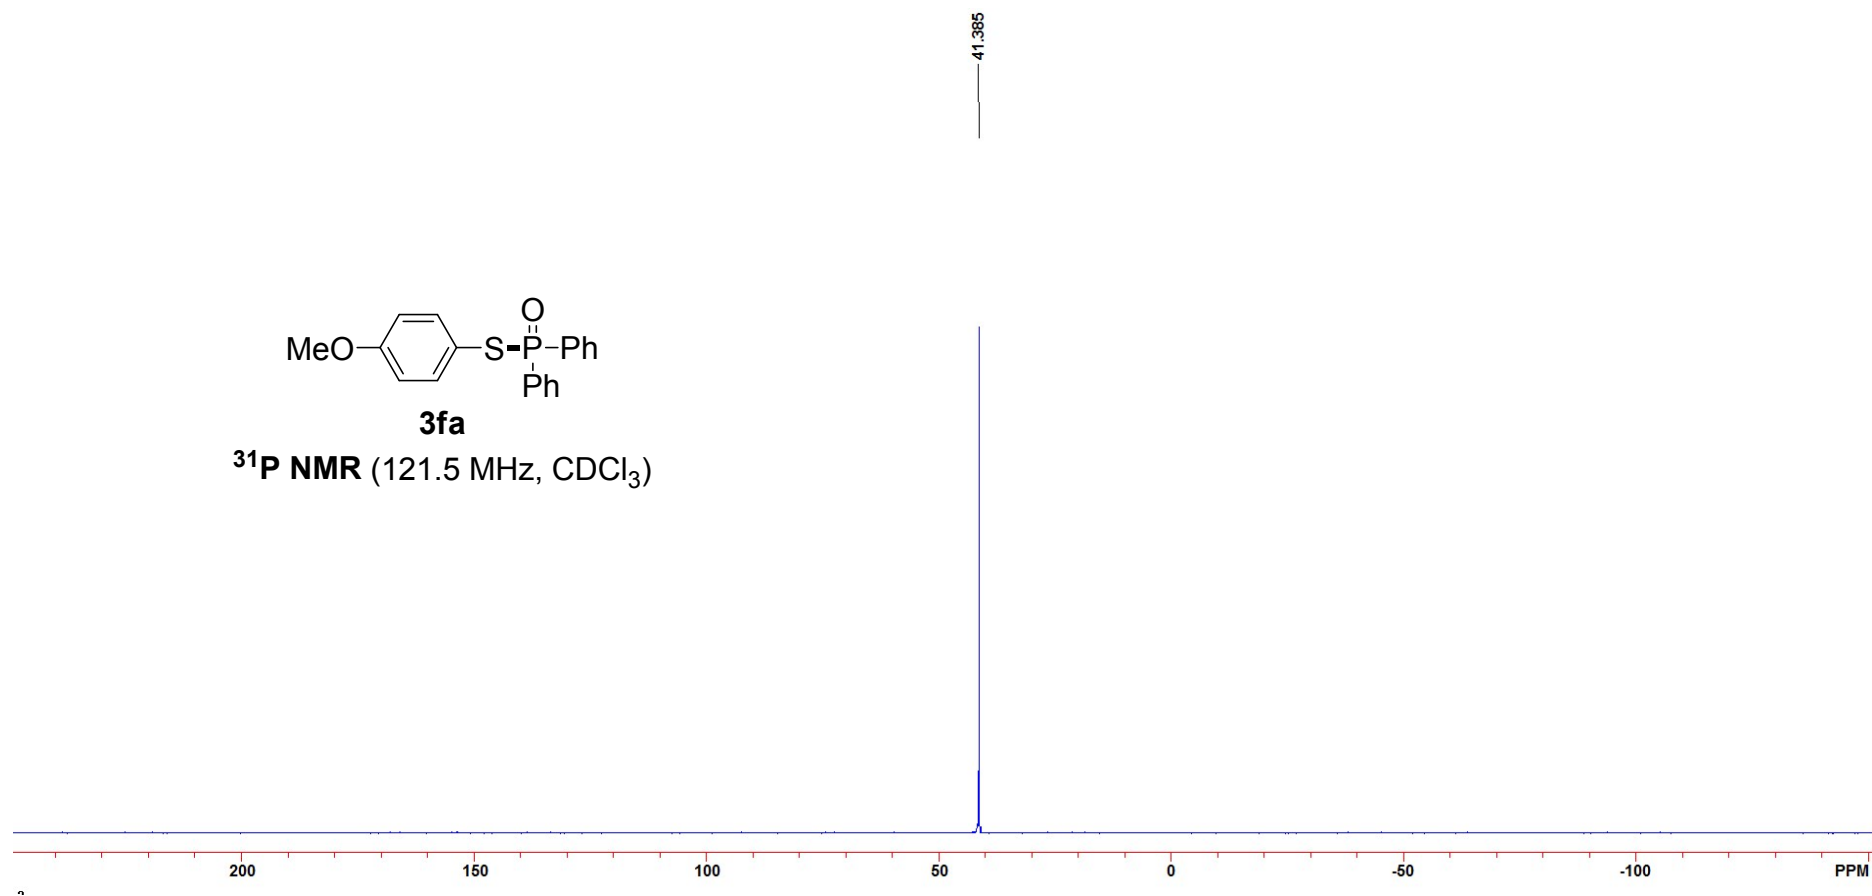

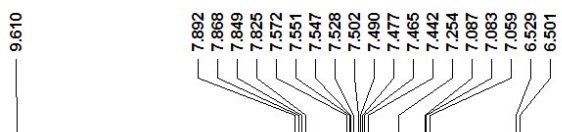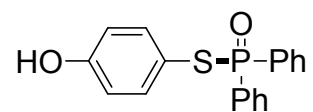

**3ga**

<sup>1</sup>H NMR (300 MHz, CDCl<sub>3</sub>)

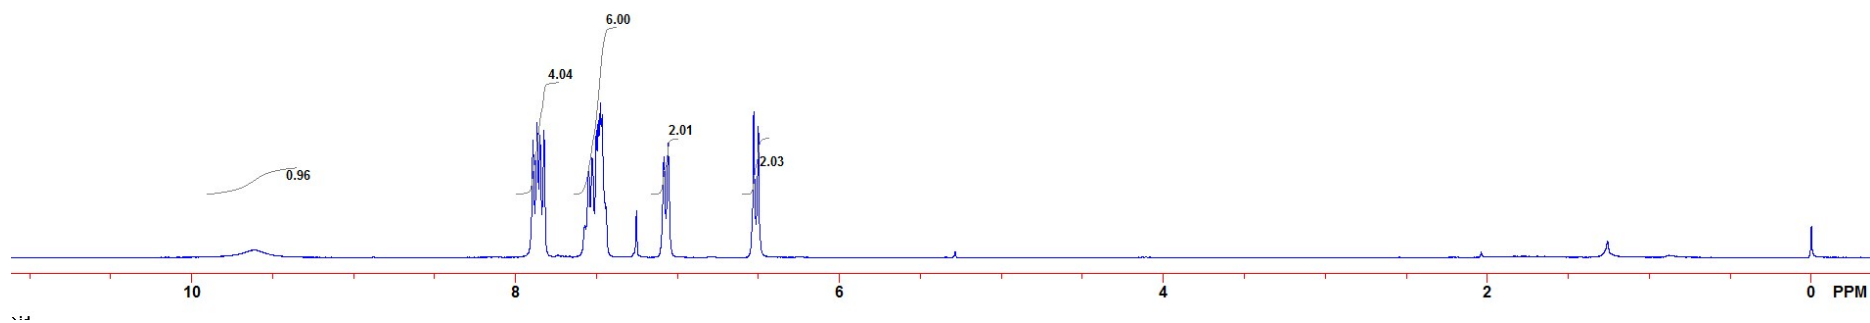

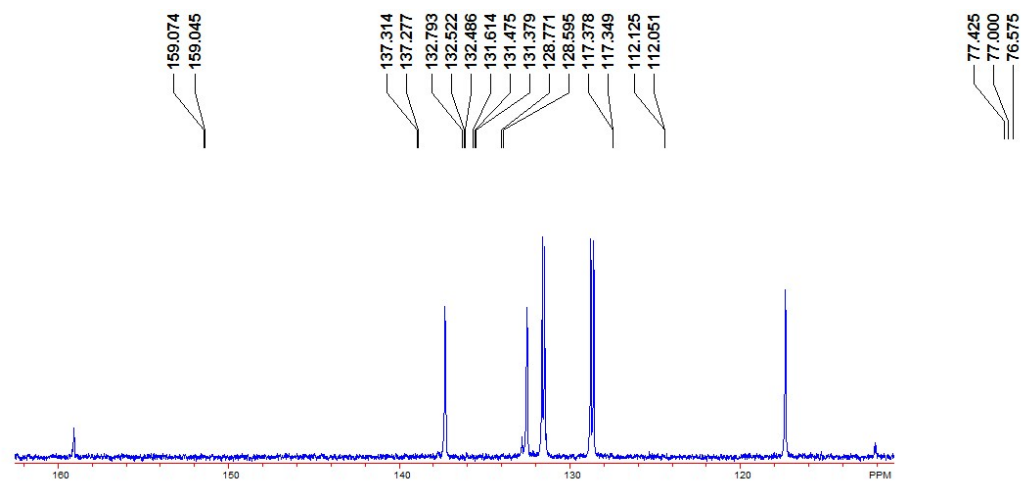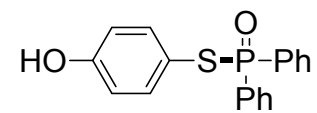

**3ga**

**$^{13}\text{C}$  NMR (75 MHz,  $\text{CDCl}_3$ )**

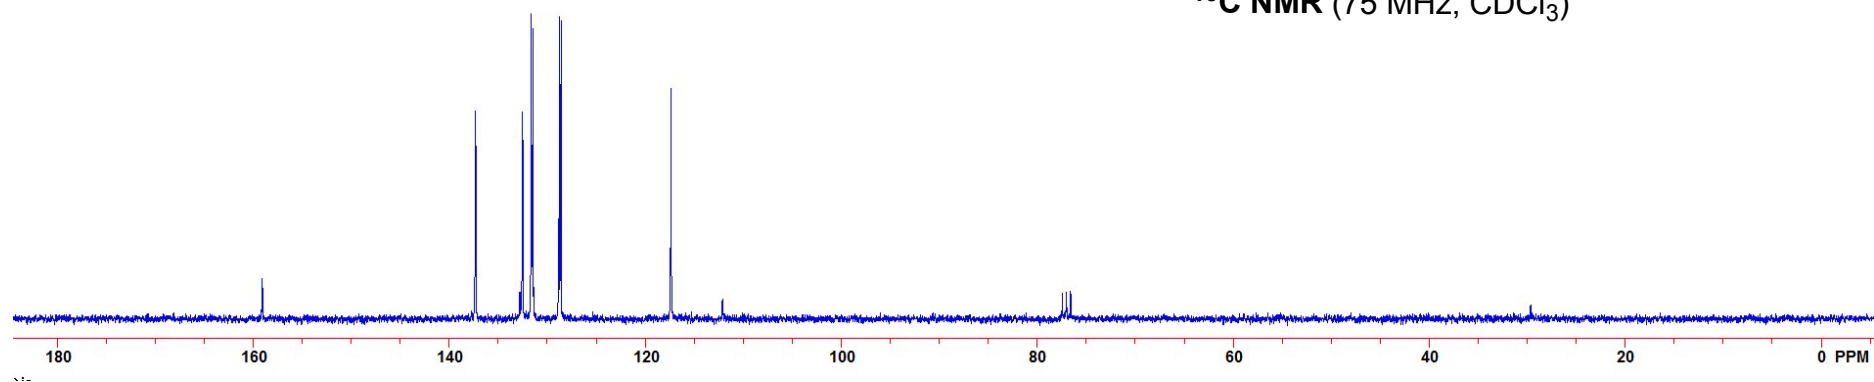



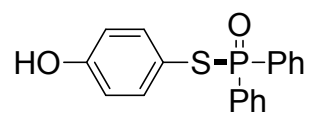

**3ga**

**<sup>31</sup>P NMR** (121.5 MHz, CDCl<sub>3</sub>)

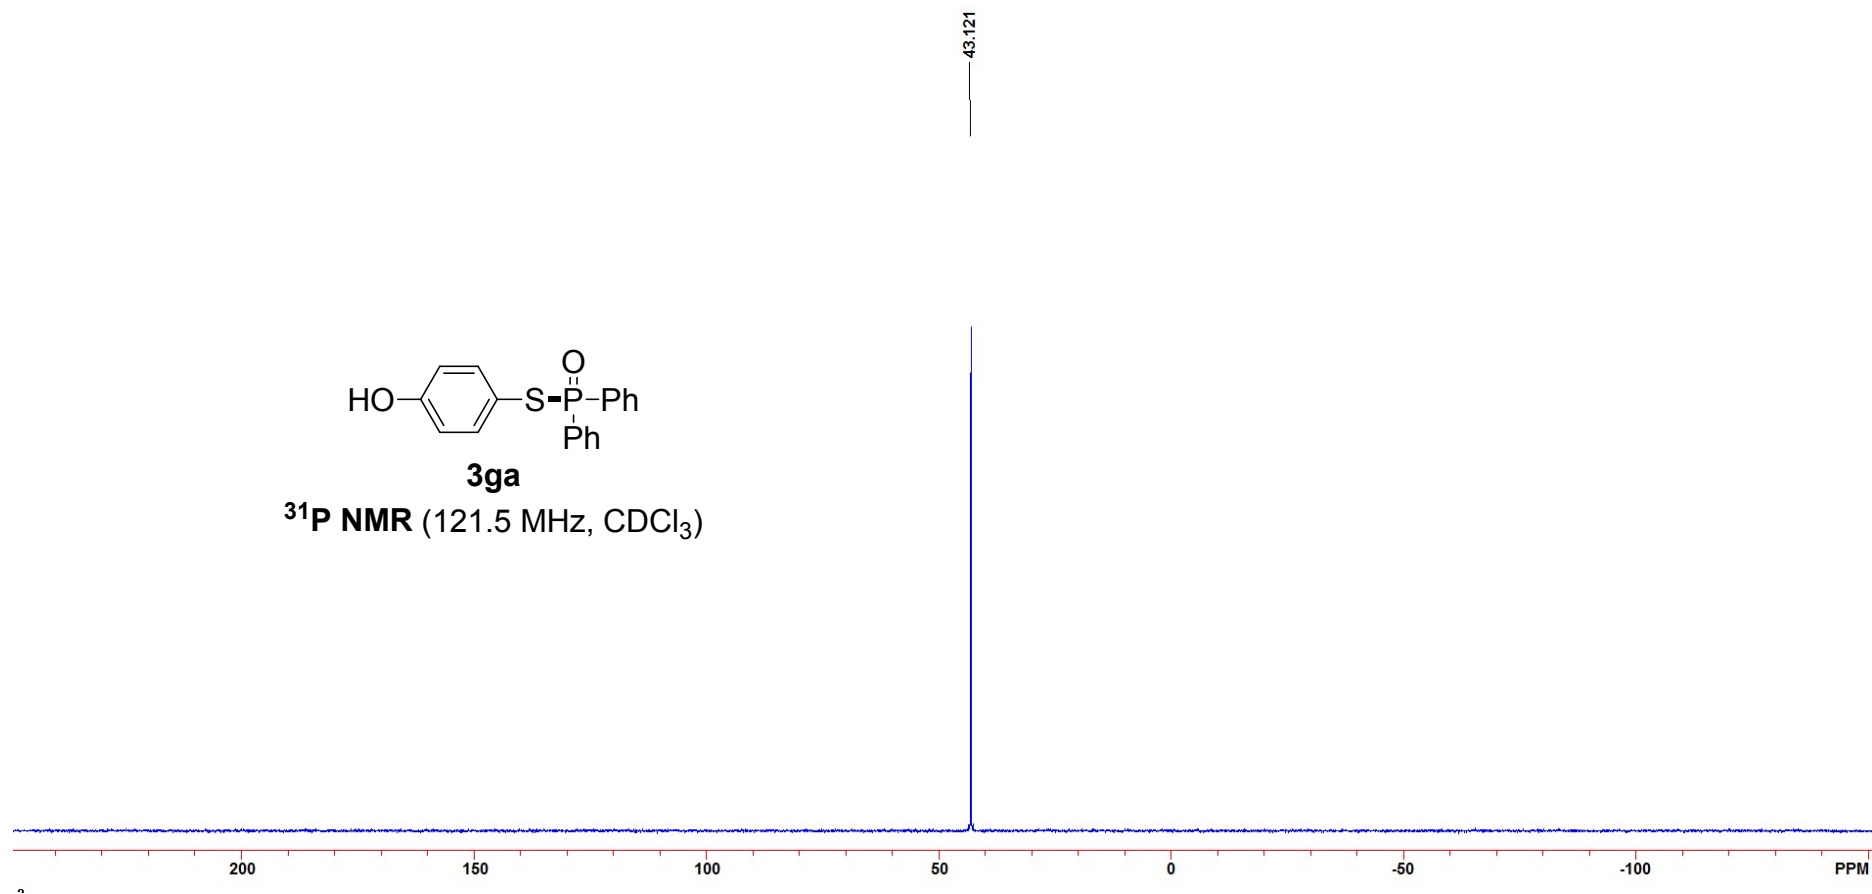

7.864  
7.838  
7.822  
7.796  
7.510  
7.485  
7.462  
7.445  
7.434  
7.420  
7.409  
7.387  
7.263  
7.152  
7.126  
6.447  
6.420

3.615

0.000

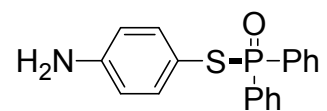

**3ha**

<sup>1</sup>H NMR (300 MHz, CDCl<sub>3</sub>)

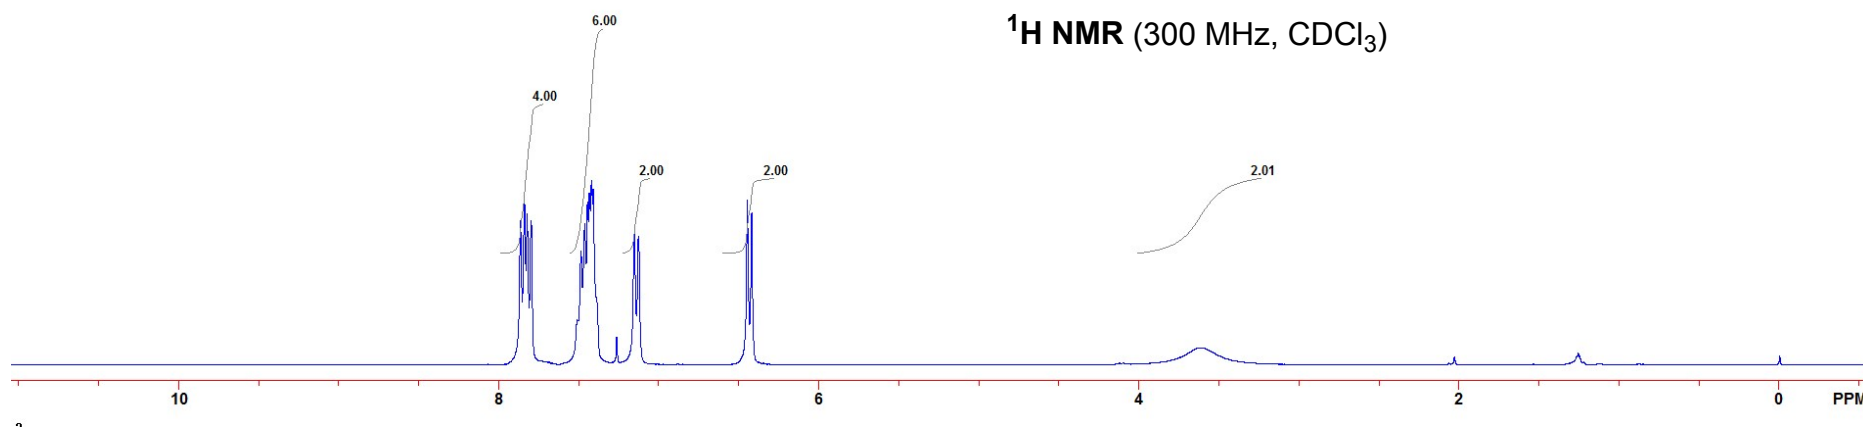

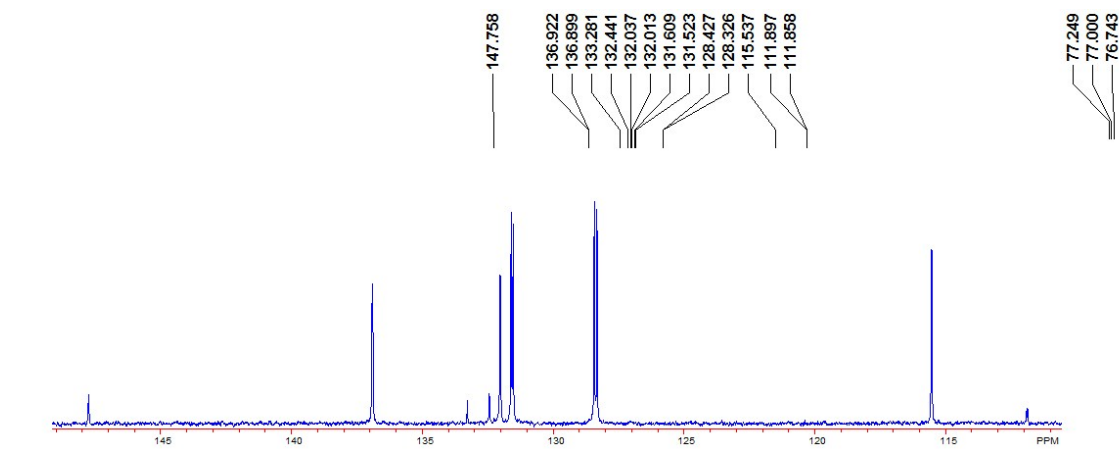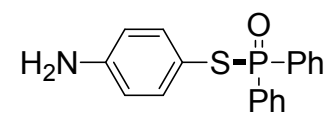

**3ha**

**$^{13}\text{C}$  NMR (125 MHz,  $\text{CDCl}_3$ )**

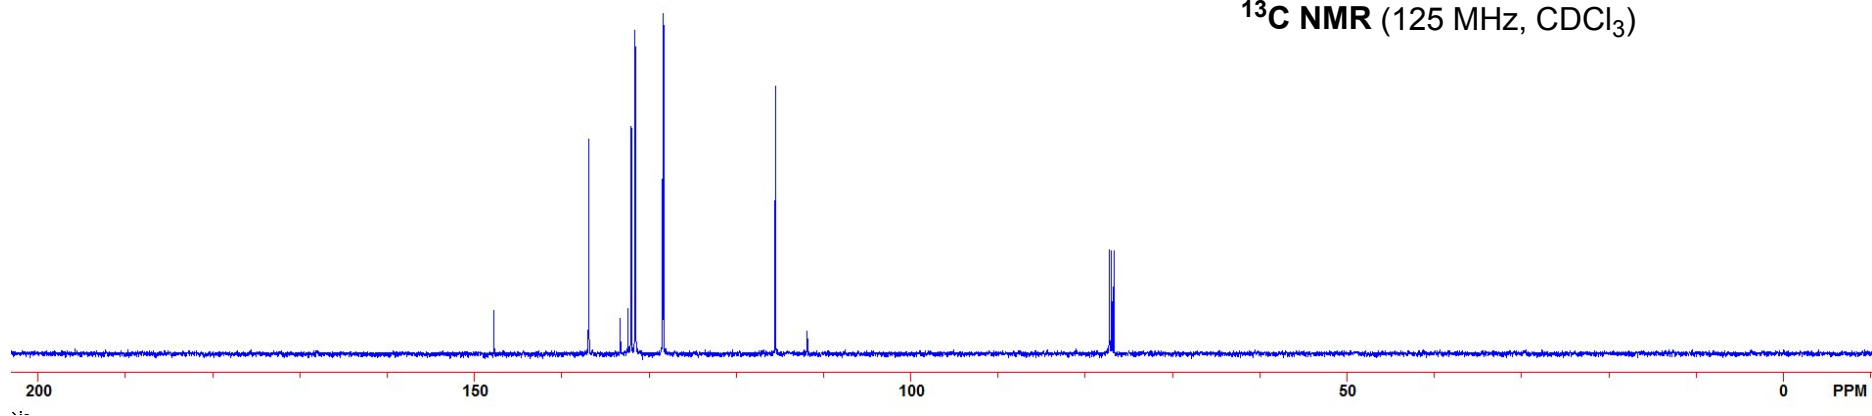

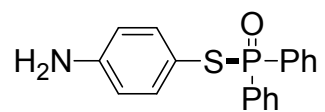

**3ha**

**$^{31}\text{P}$  NMR (121.5 MHz,  $\text{CDCl}_3$ )**

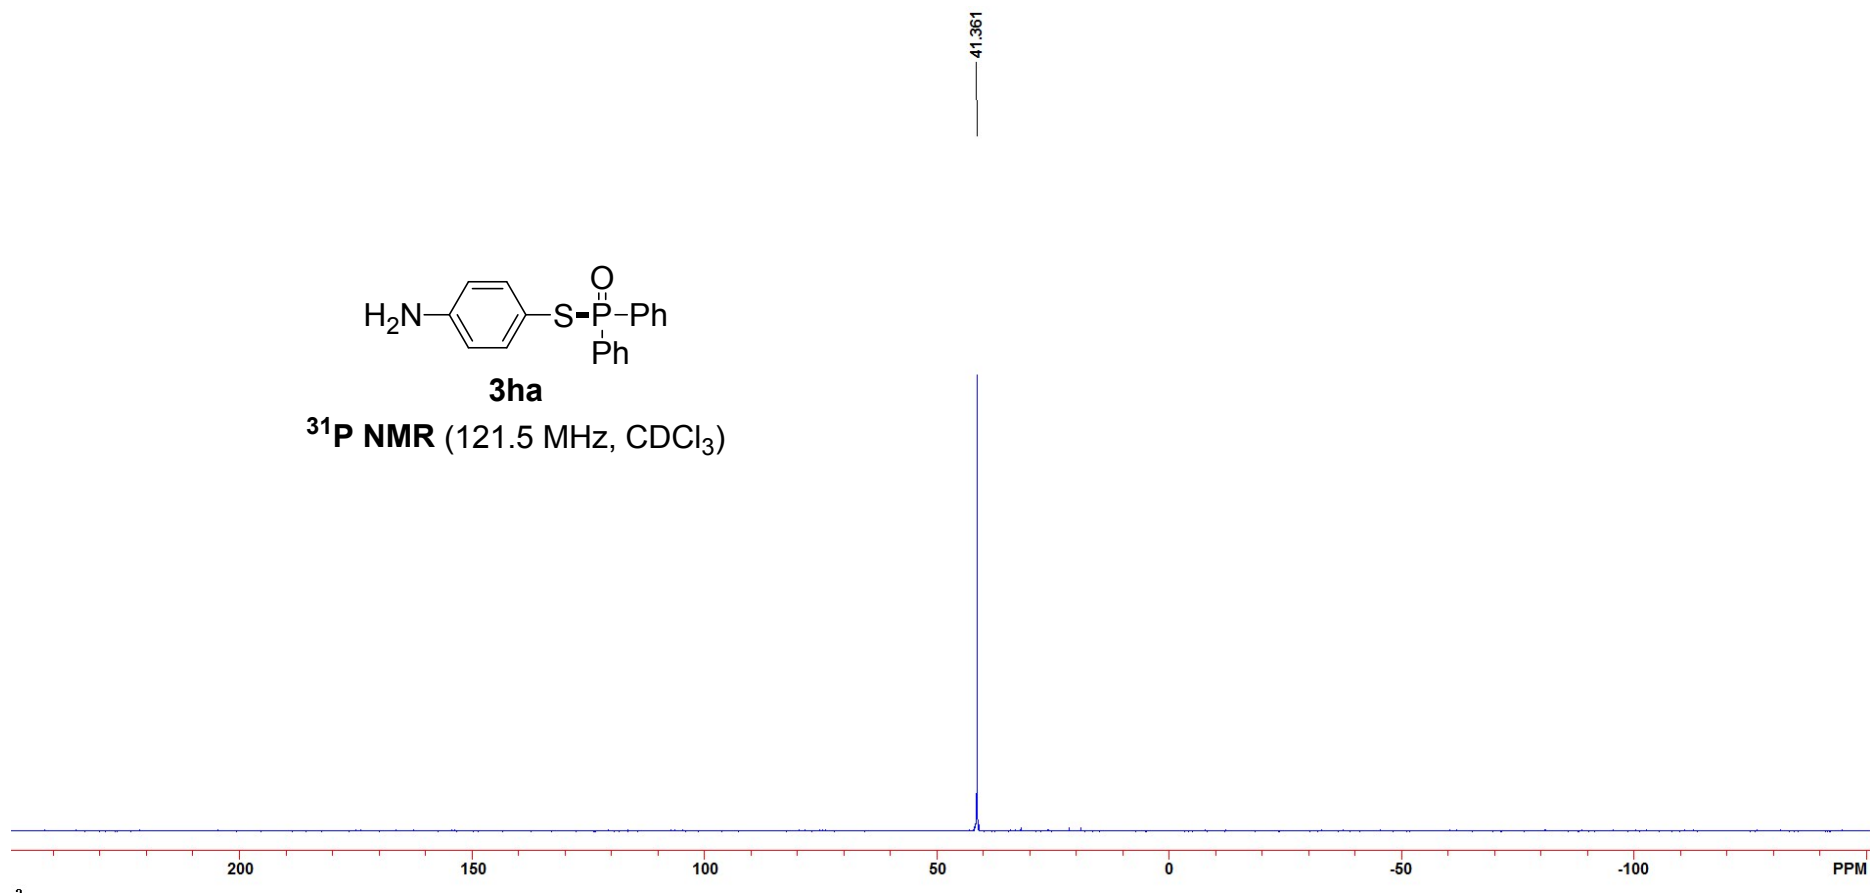

7.868  
7.844  
7.826  
7.801  
7.530  
7.523  
7.505  
7.483  
7.463  
7.451  
7.427  
7.410  
7.405  
7.387  
7.270  
6.913  
6.885  
6.856

0.000

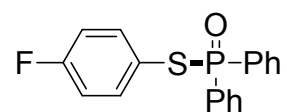

**3ia**

<sup>1</sup>H NMR (300 MHz, CDCl<sub>3</sub>)

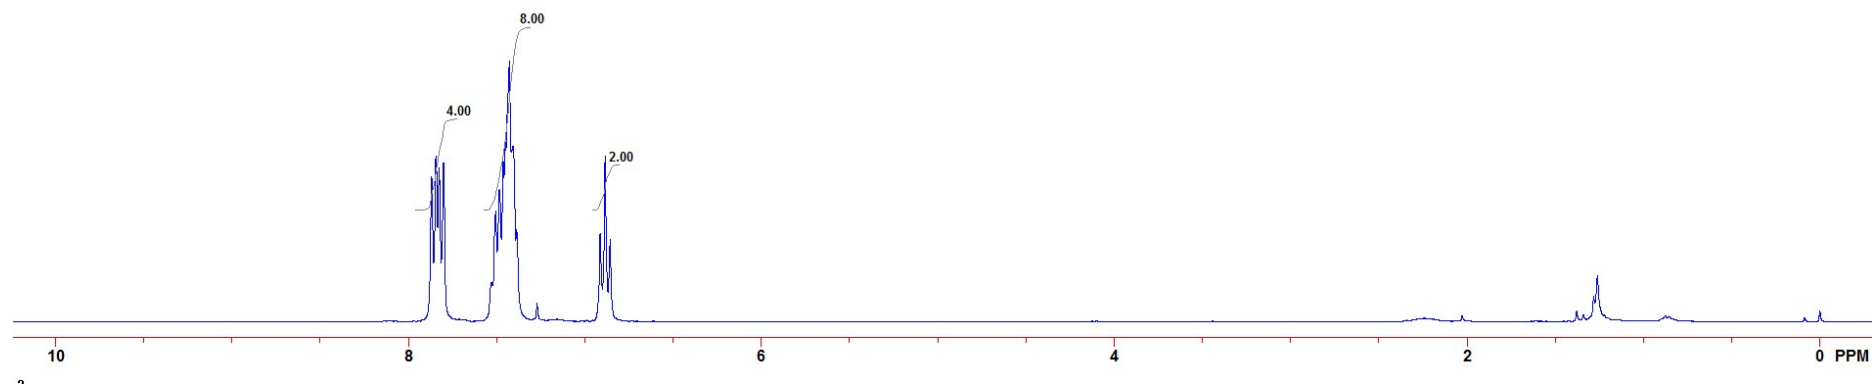

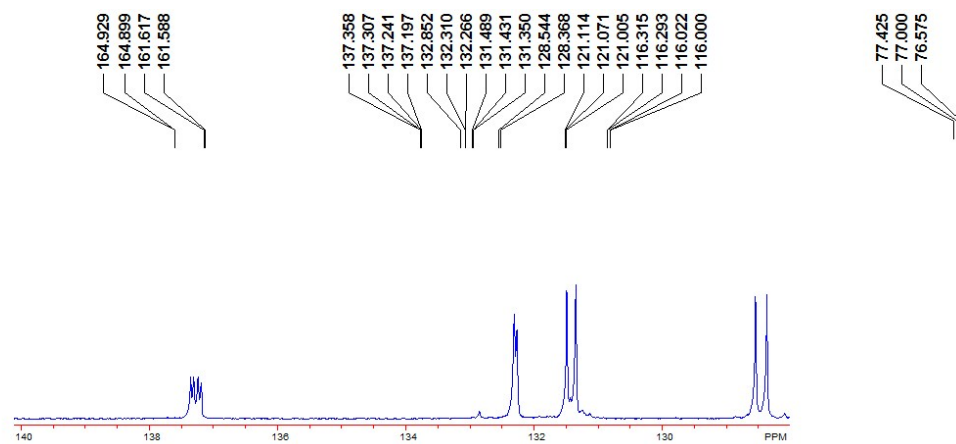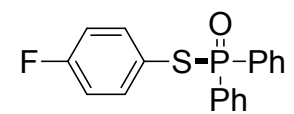

**3ia**

**$^{13}\text{C}$  NMR (75 MHz,  $\text{CDCl}_3$ )**

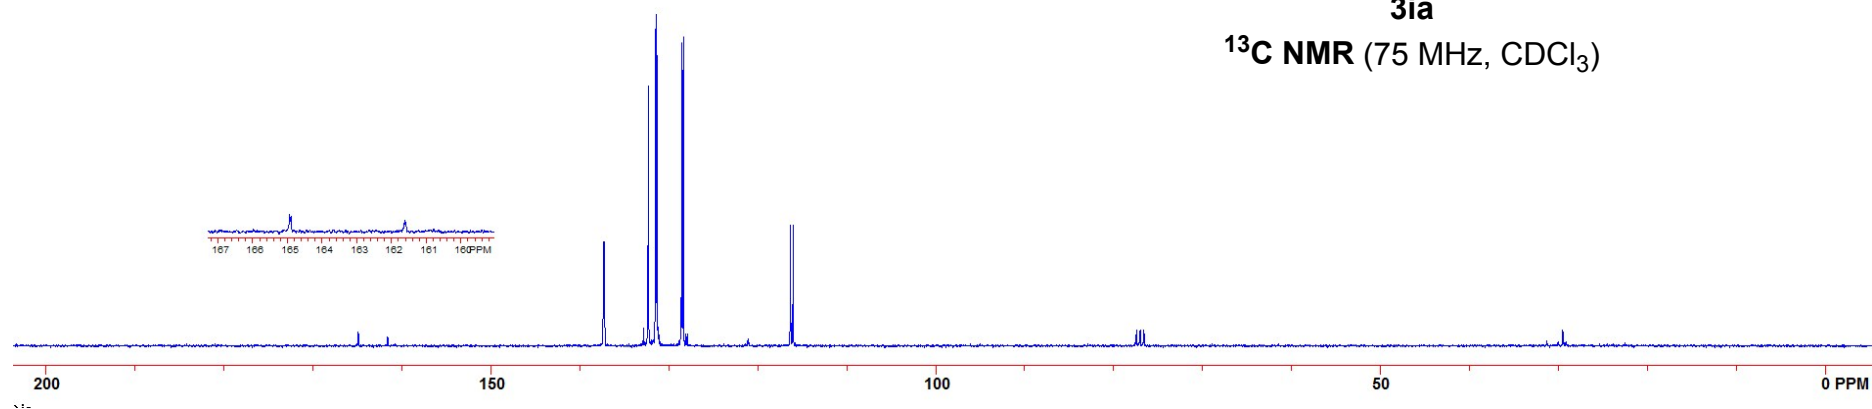

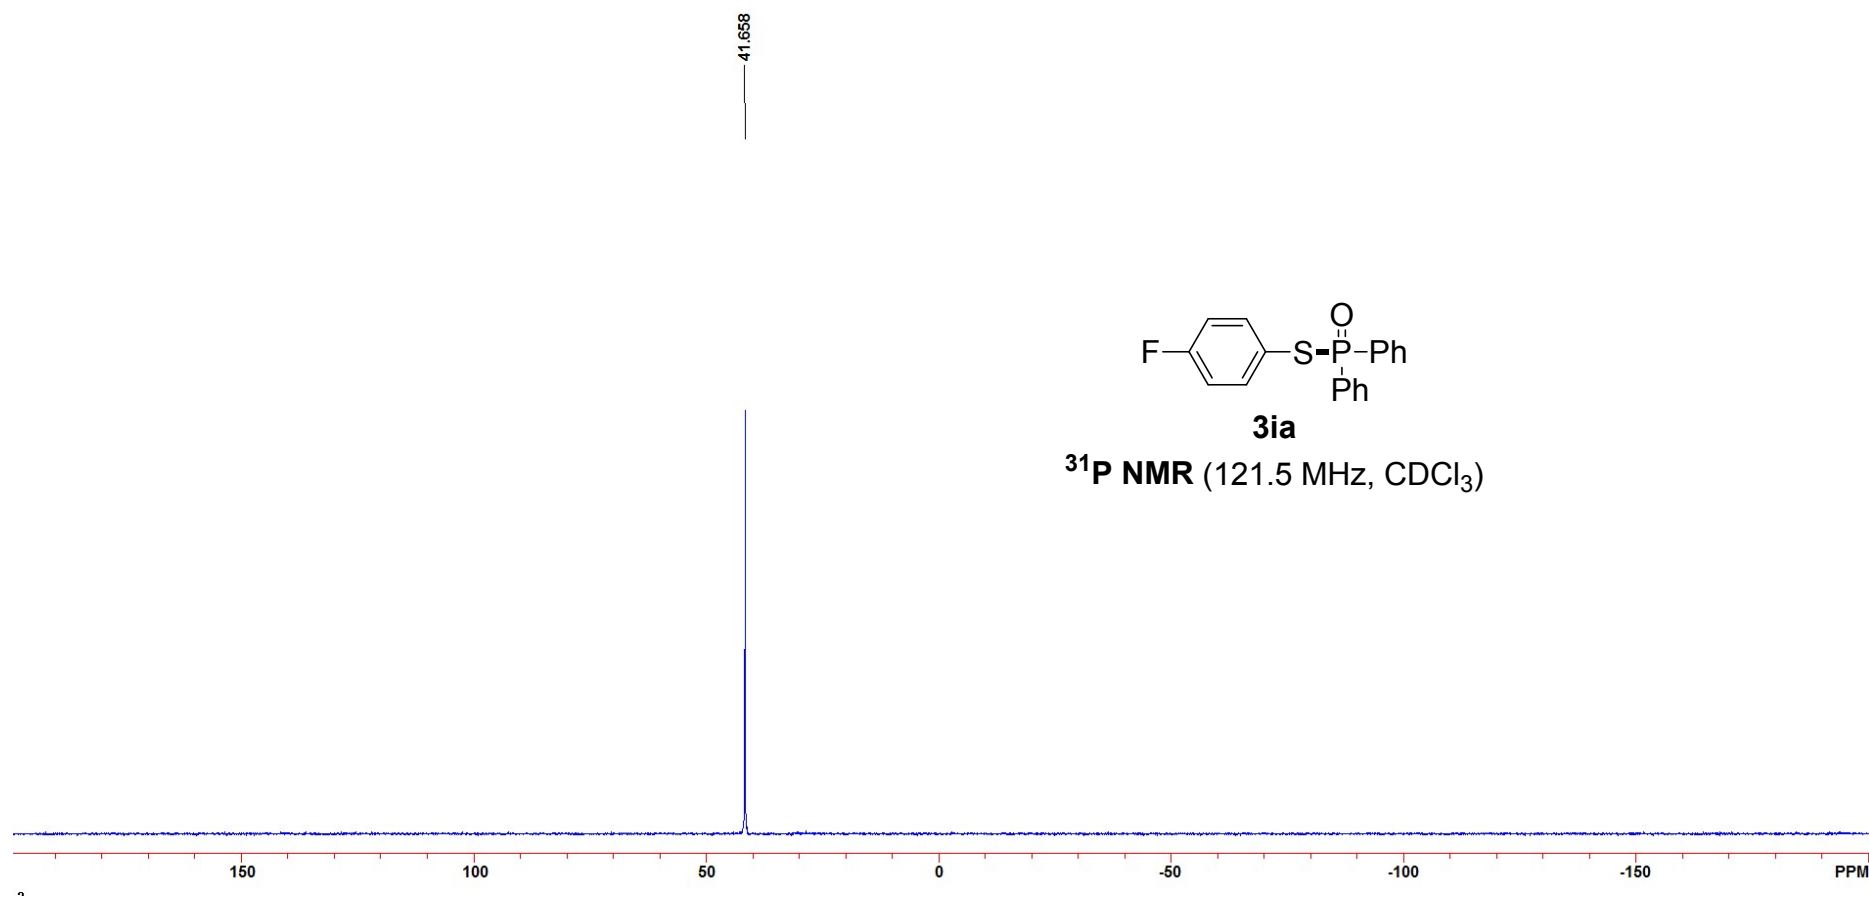

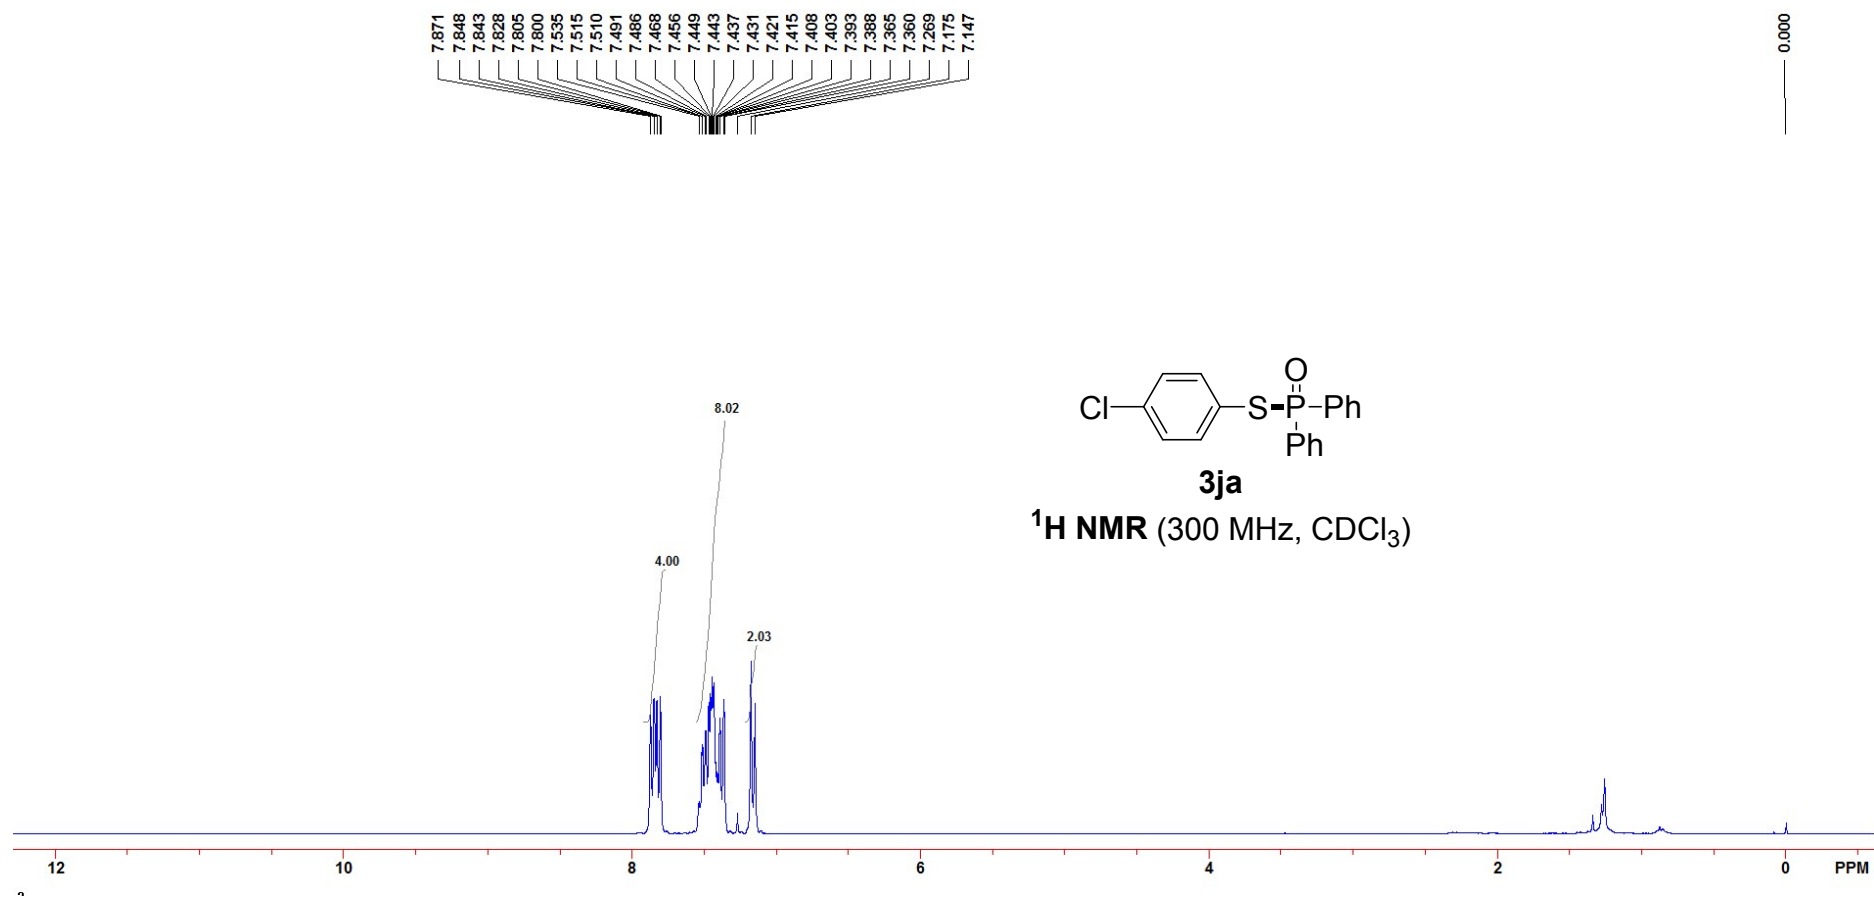



136.502  
136.471  
135.530  
135.514  
132.698  
132.457  
132.434  
131.842  
131.617  
131.531  
129.275  
128.653  
128.544  
124.756  
124.717

77.257  
77.000  
76.743

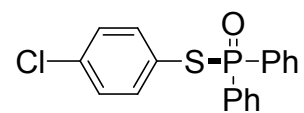

**3ja**

**<sup>13</sup>C NMR (125 MHz, CDCl<sub>3</sub>)**

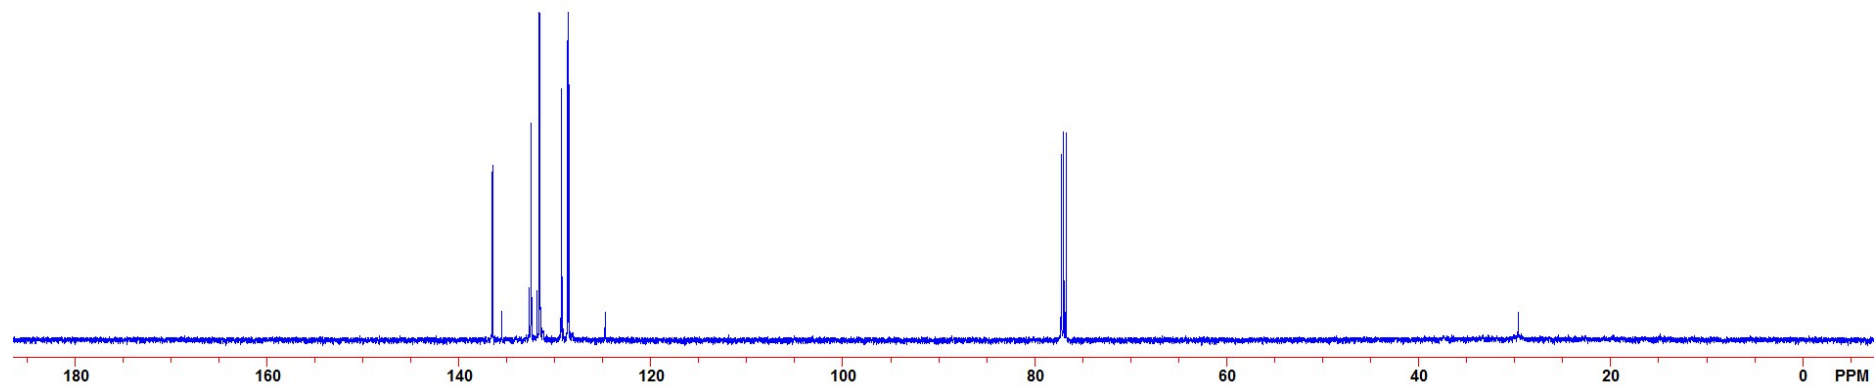

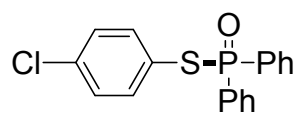

**3ja**

**<sup>31</sup>P NMR** (121.5 MHz, CDCl<sub>3</sub>)

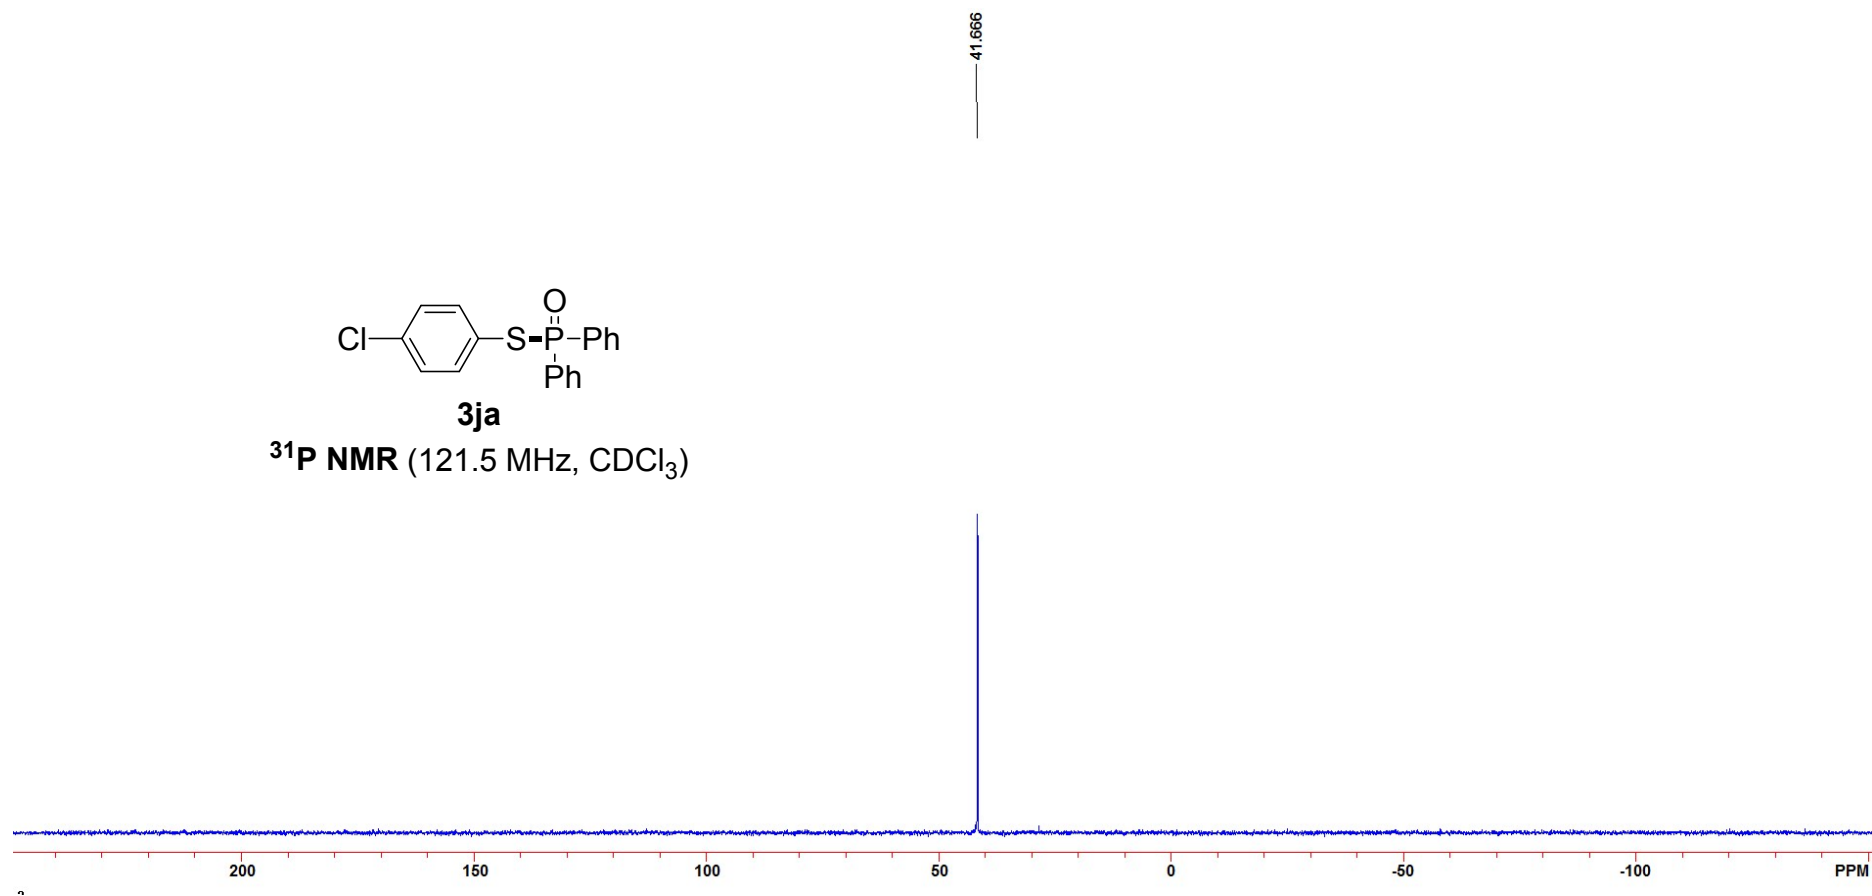

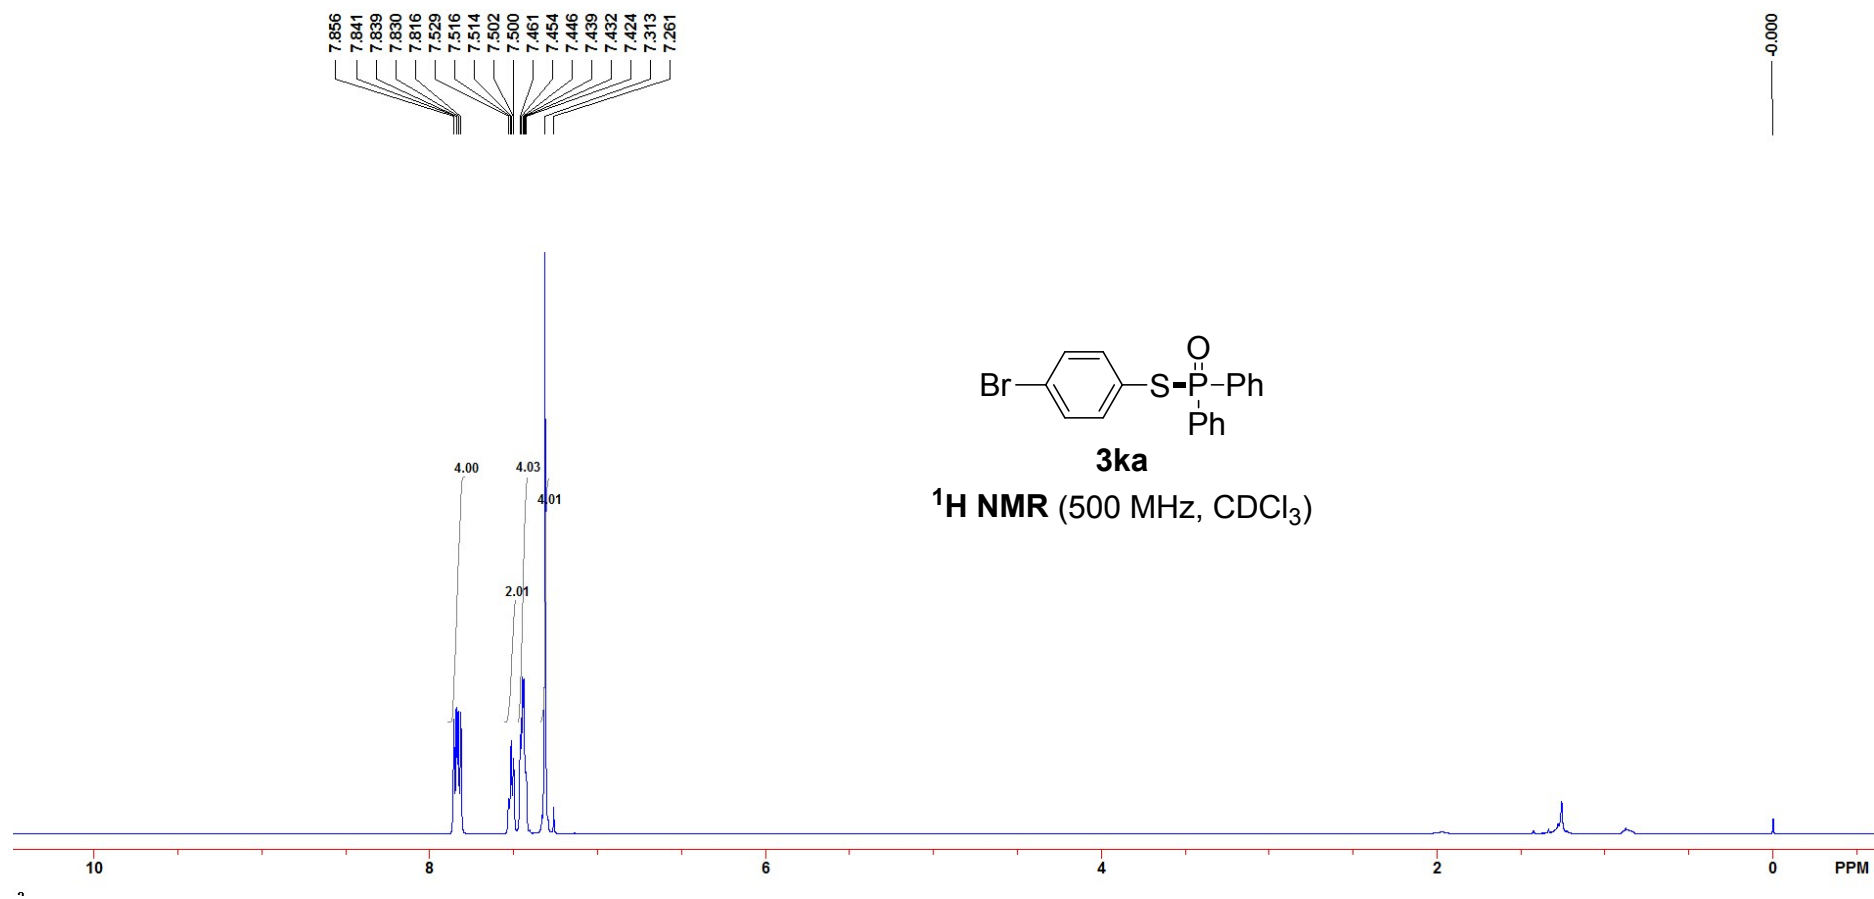

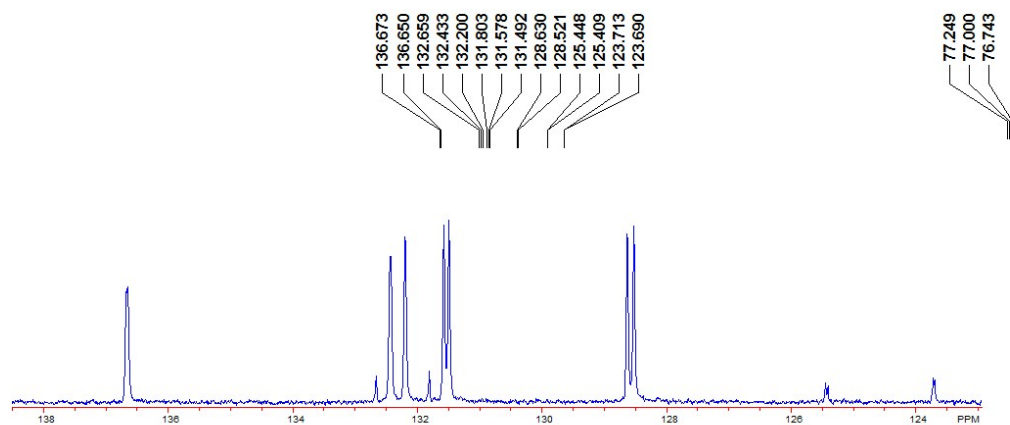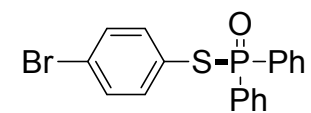

**3ka**

**<sup>13</sup>C NMR (125 MHz, CDCl<sub>3</sub>)**

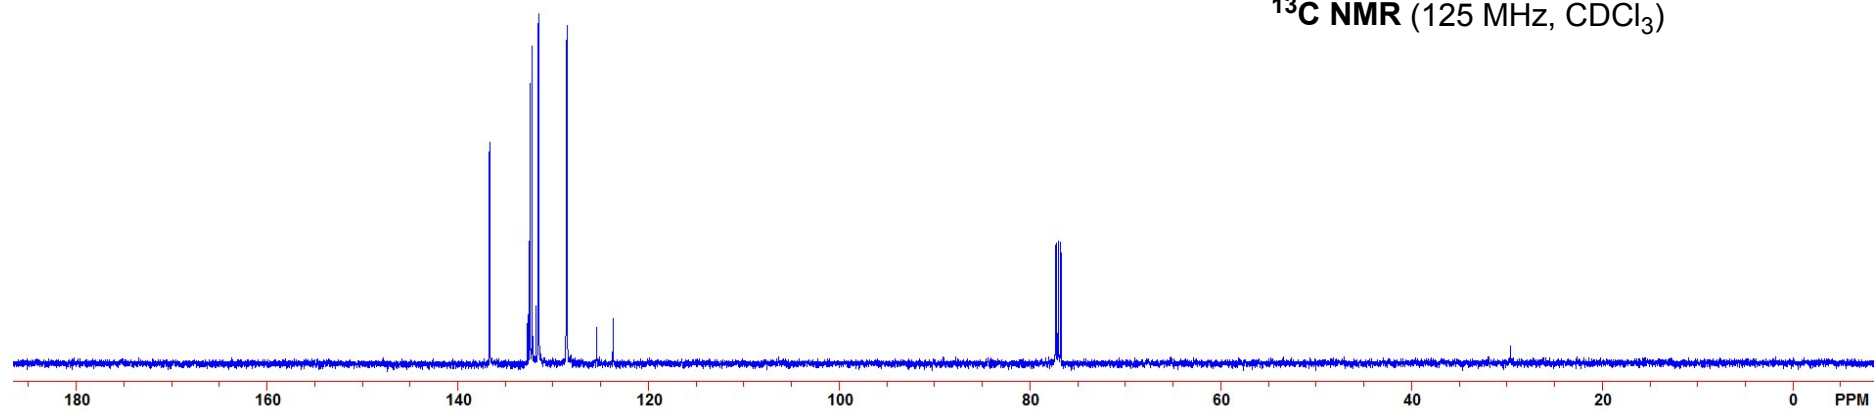

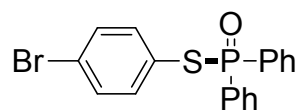

**3ka**

**<sup>31</sup>P NMR (121.5 MHz, CDCl<sub>3</sub>)**

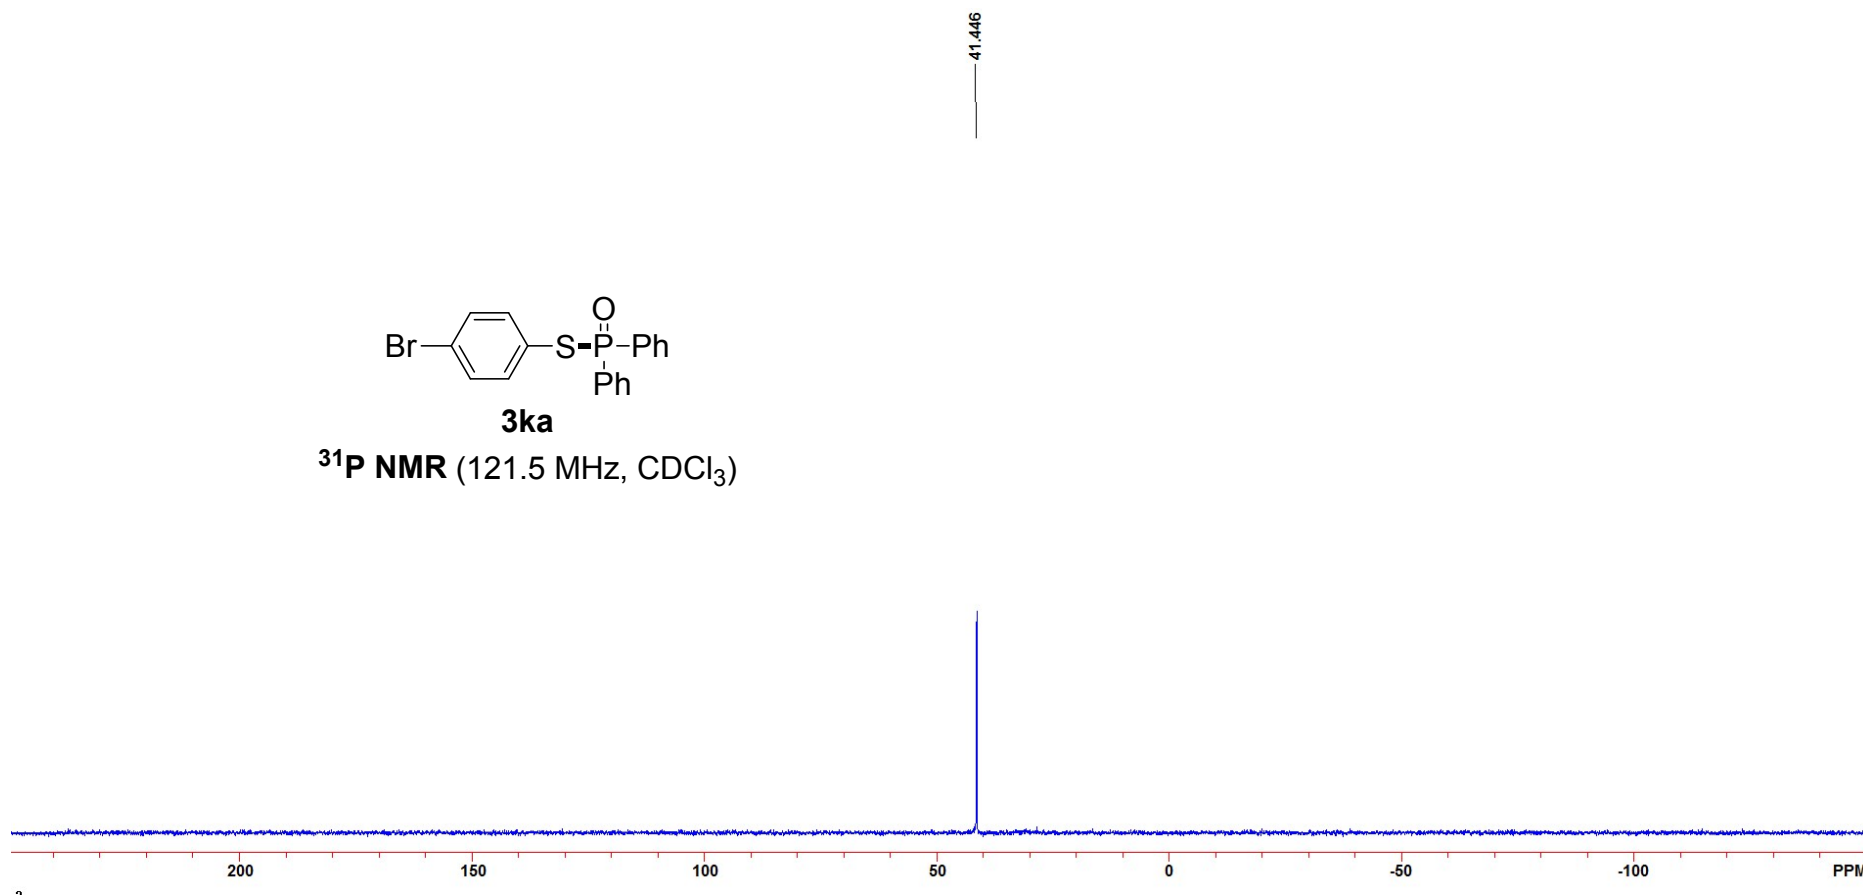

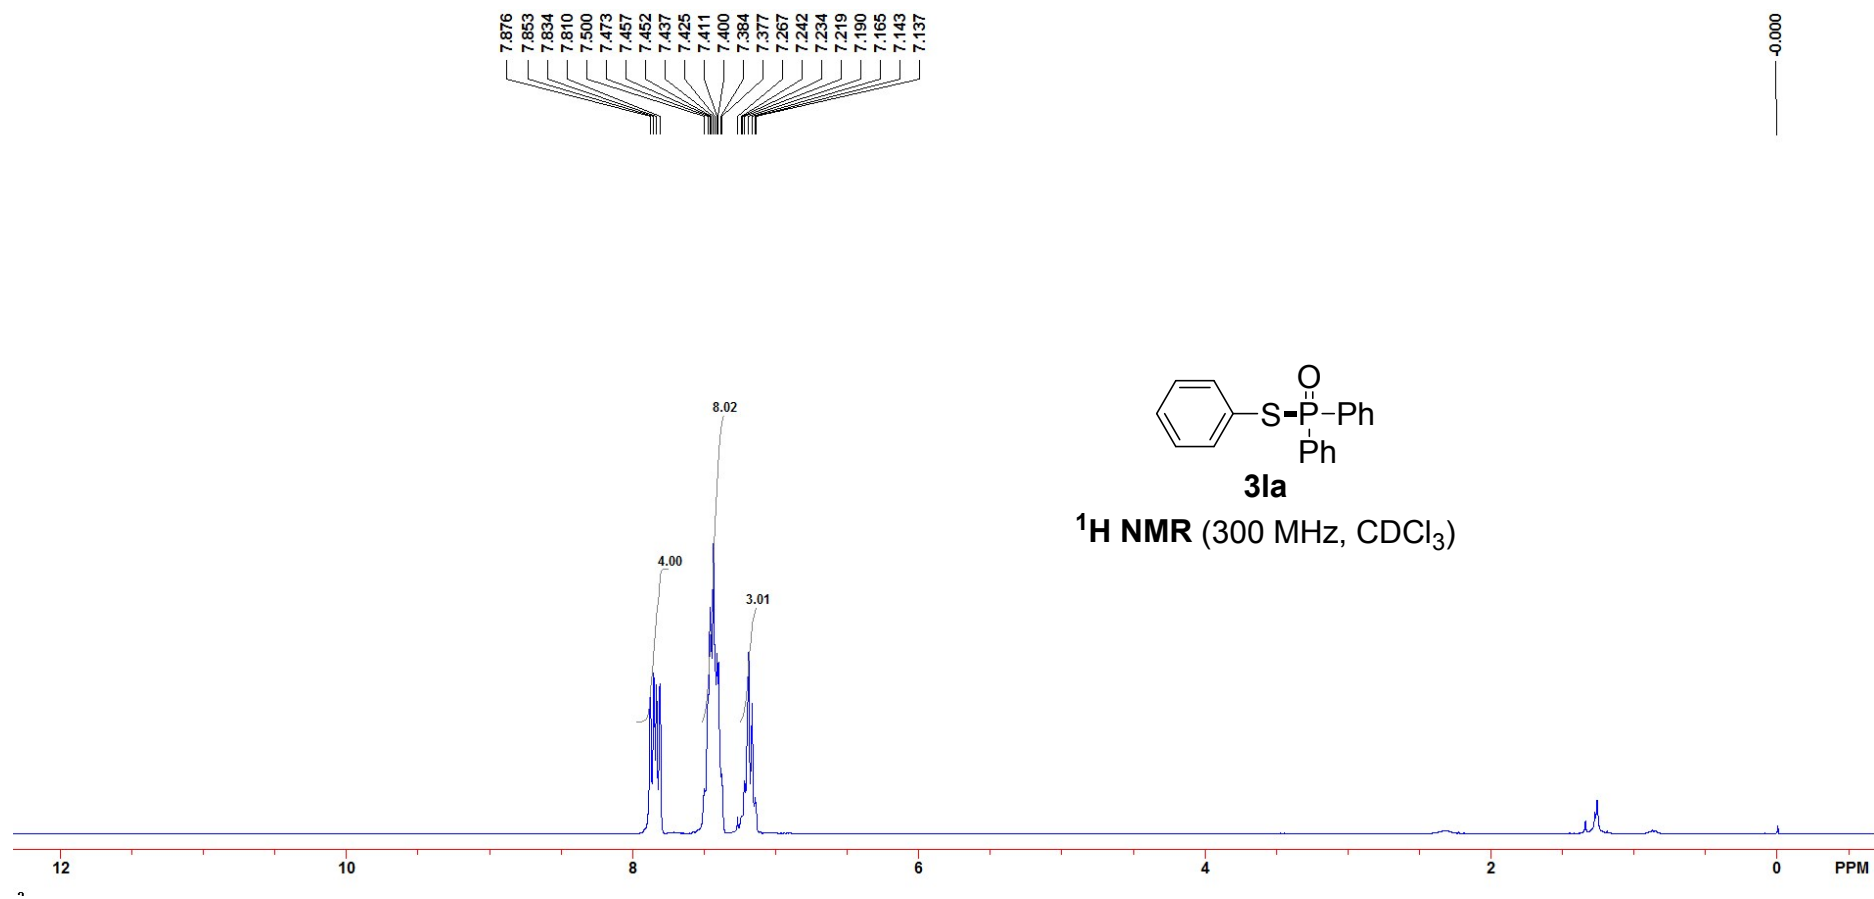

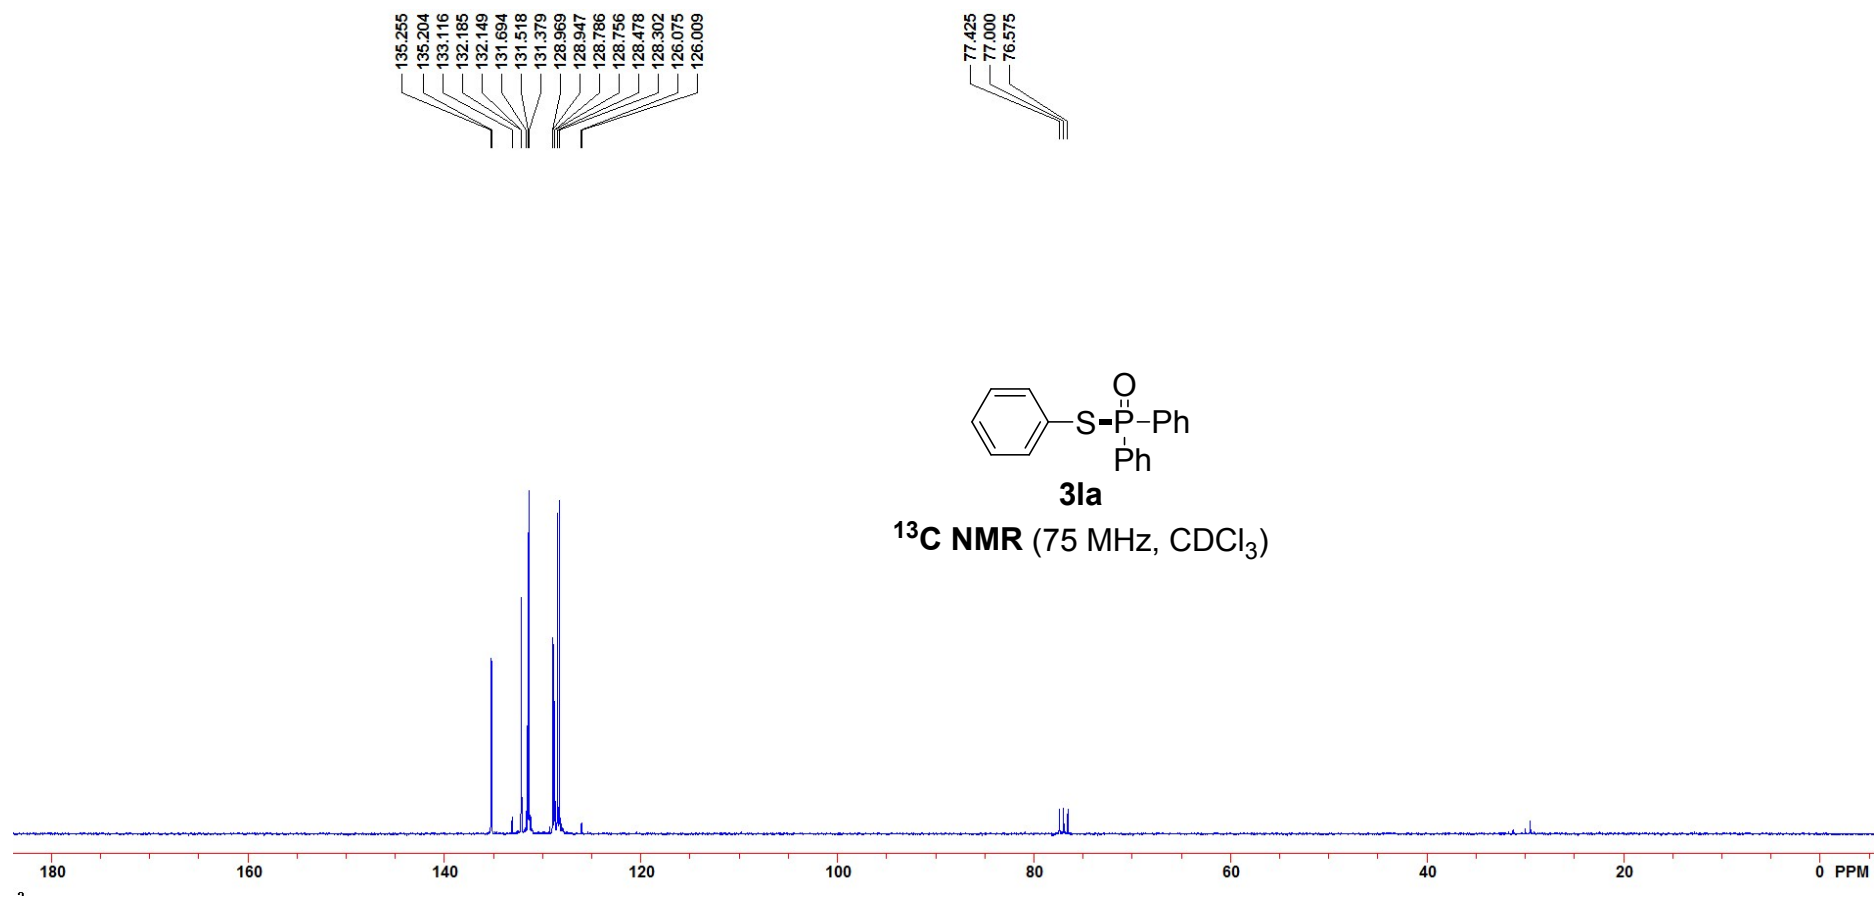

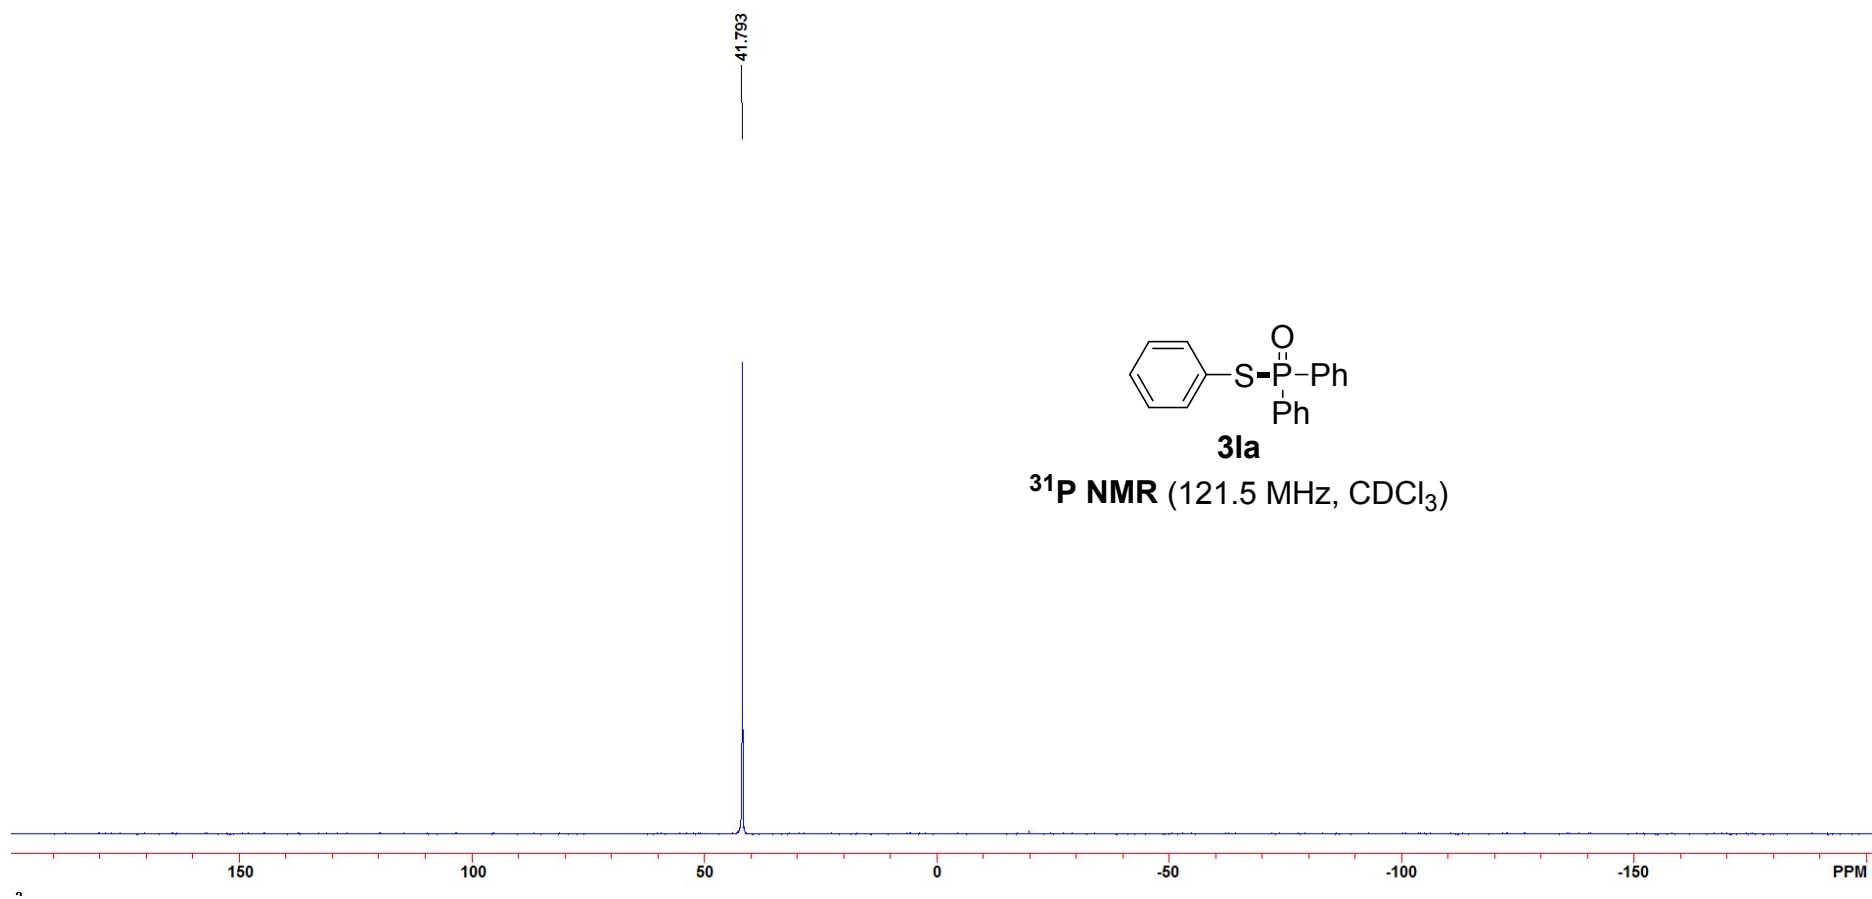



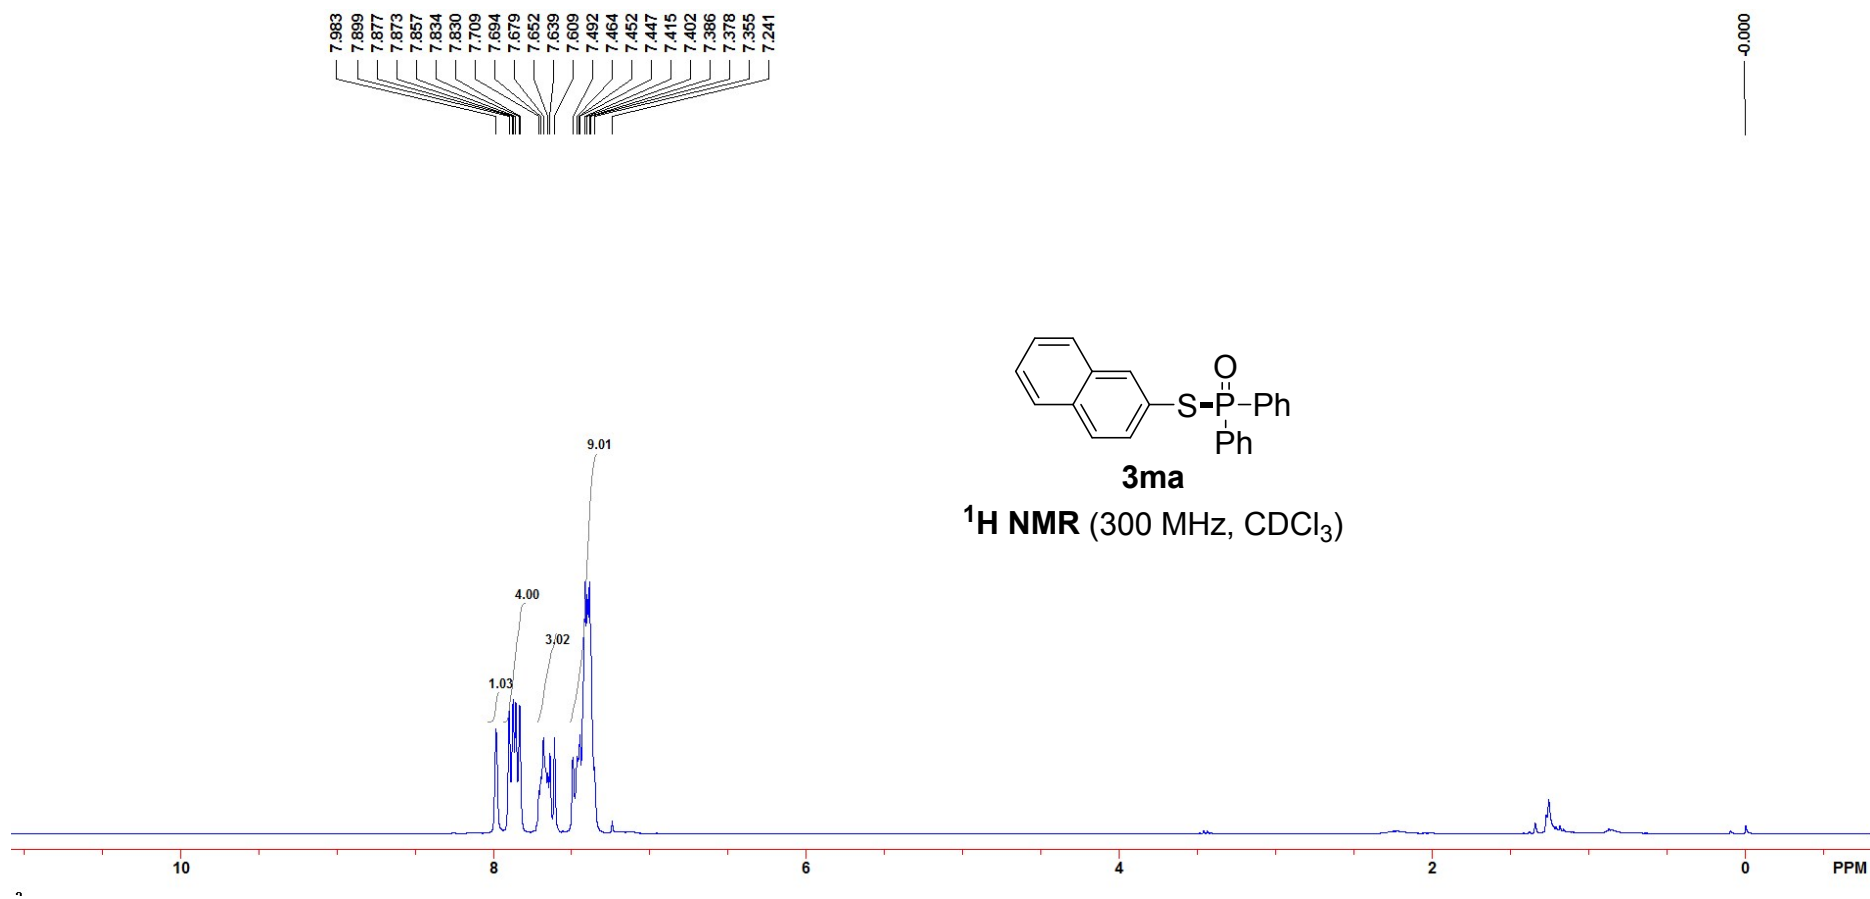

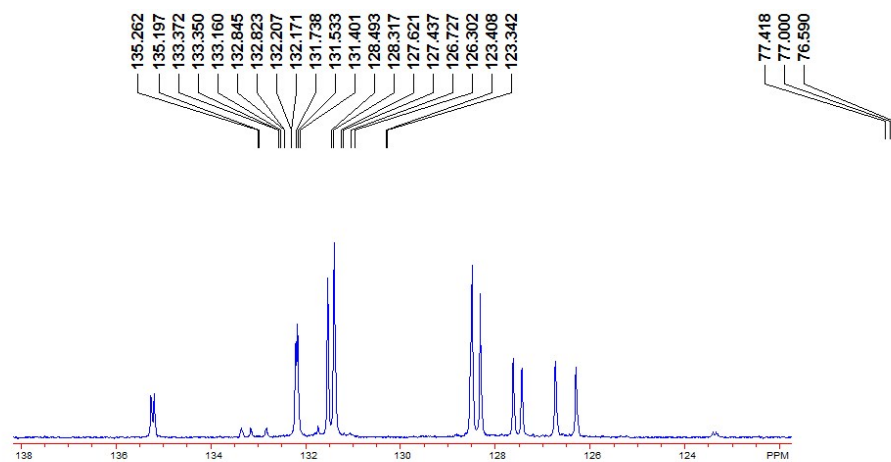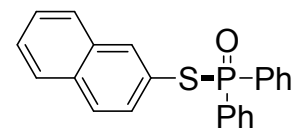

**3ma**

<sup>13</sup>C NMR (75 MHz, CDCl<sub>3</sub>)

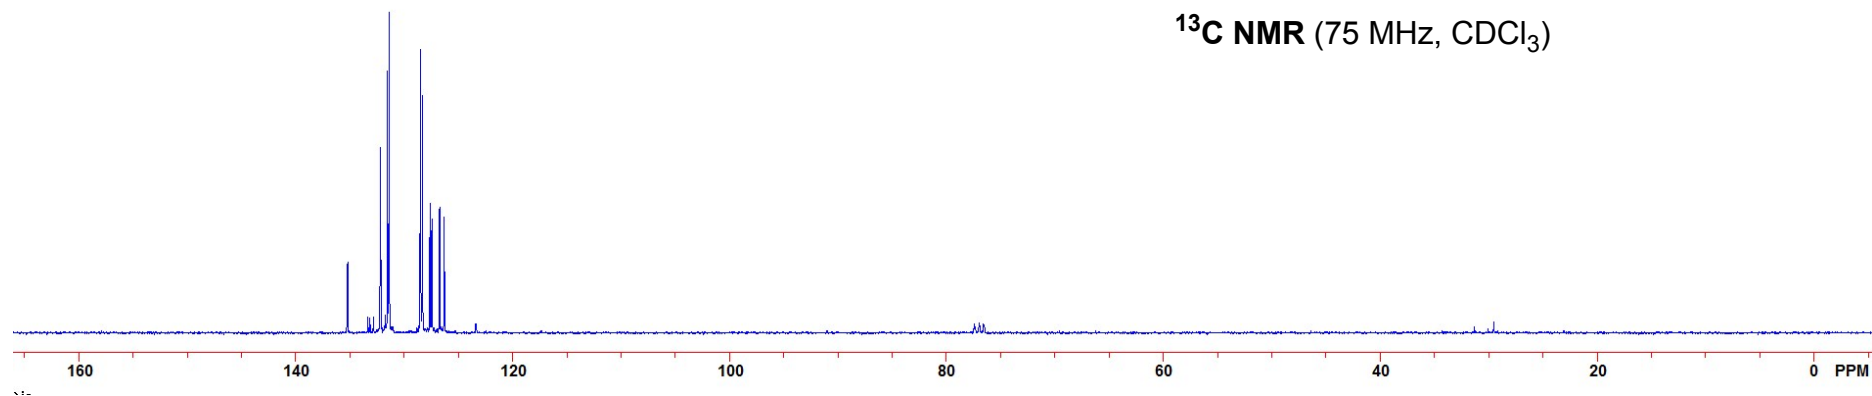

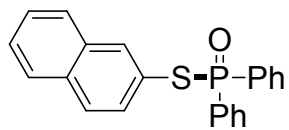

**3ma**

**$^{31}\text{P}$  NMR** (121.5 MHz,  $\text{CDCl}_3$ )

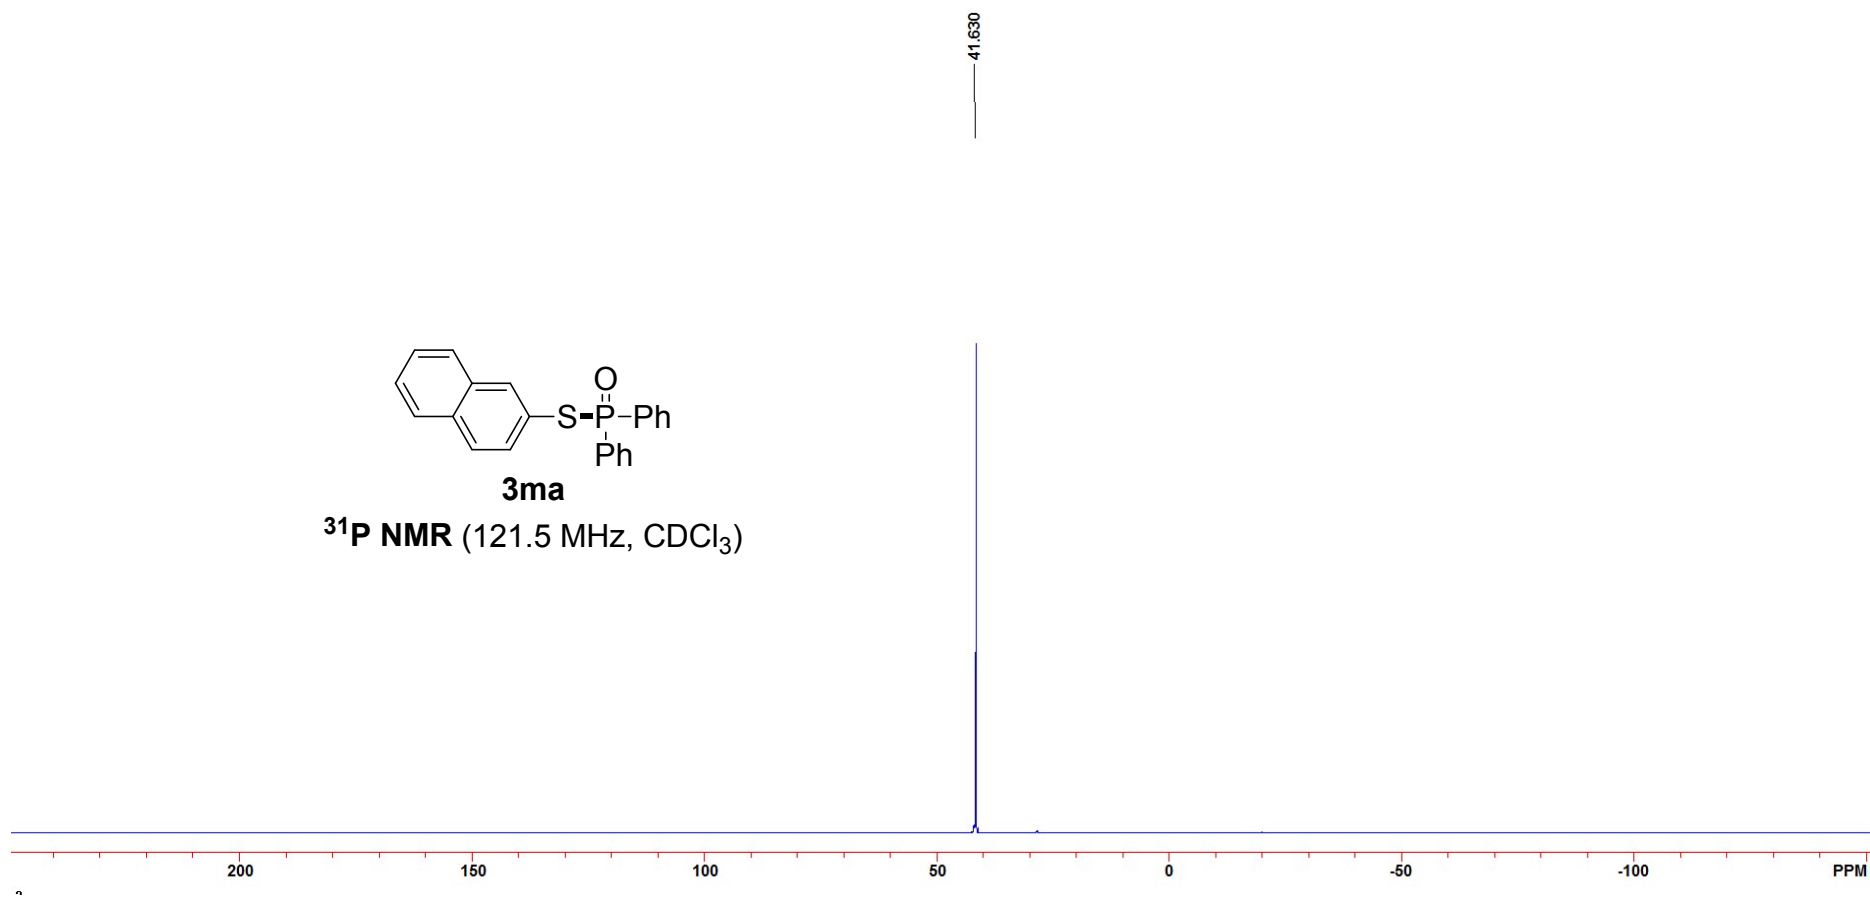

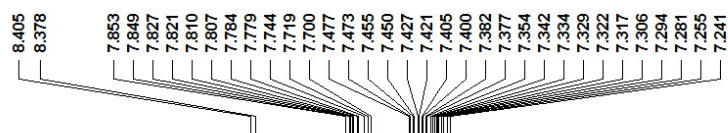

0.000

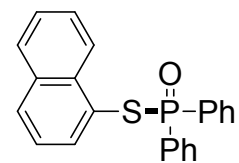

**3na**

$^1\text{H}$  NMR (300 MHz,  $\text{CDCl}_3$ )

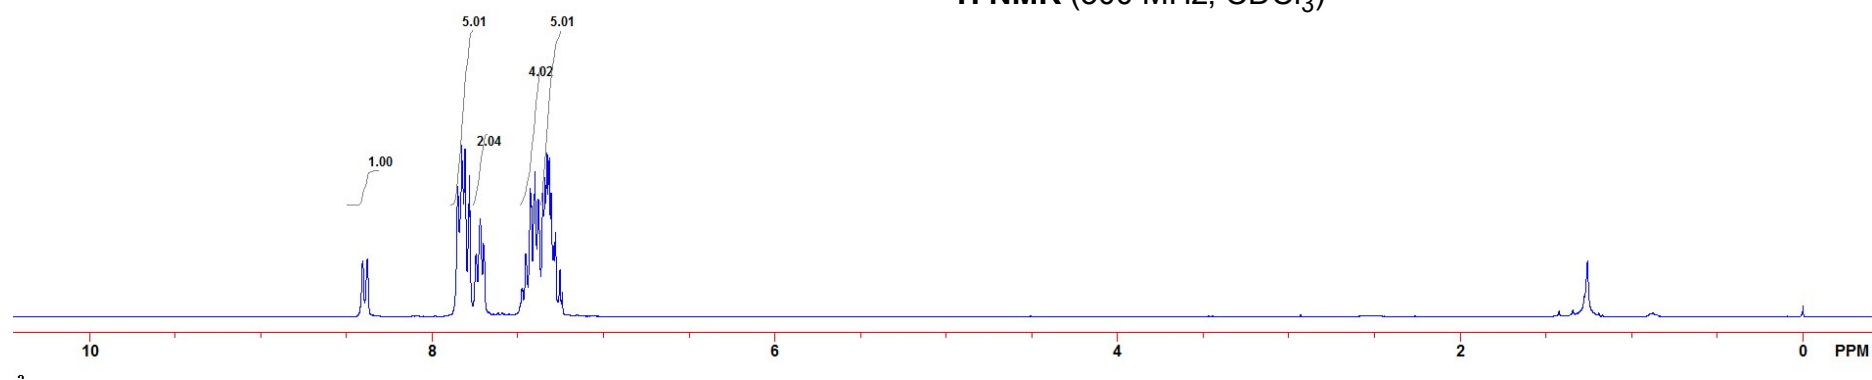

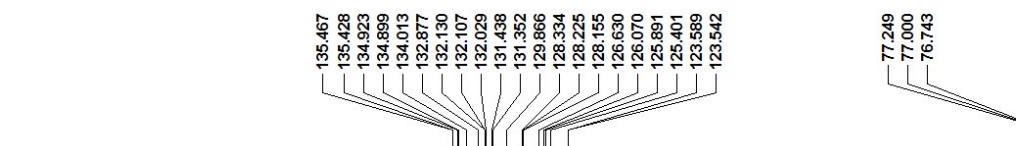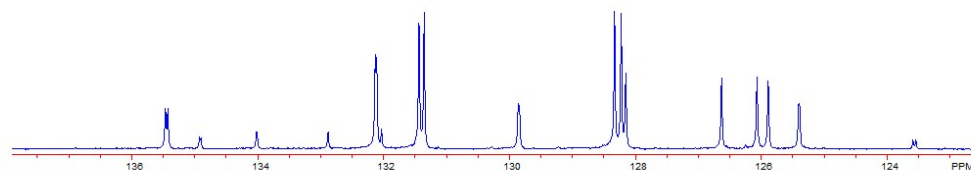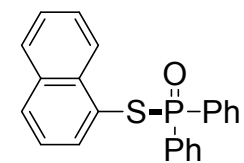

**3na**

<sup>13</sup>C NMR (125 MHz, CDCl<sub>3</sub>)

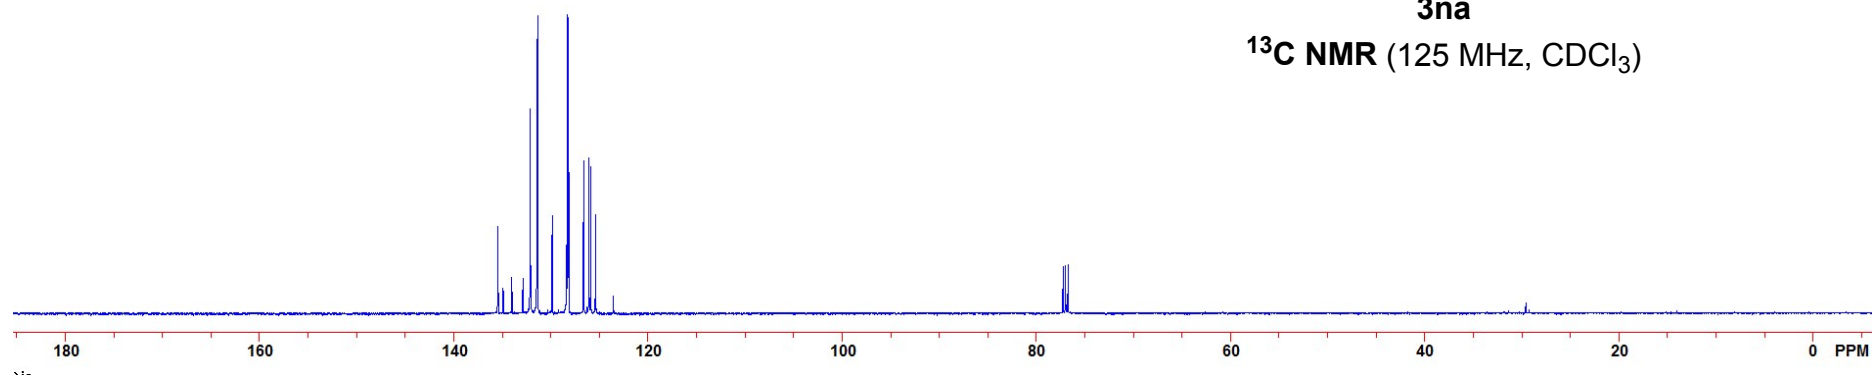

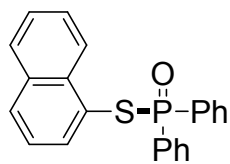

**3na**

**$^{13}\text{P}$  NMR** (121.5 MHz,  $\text{CDCl}_3$ )

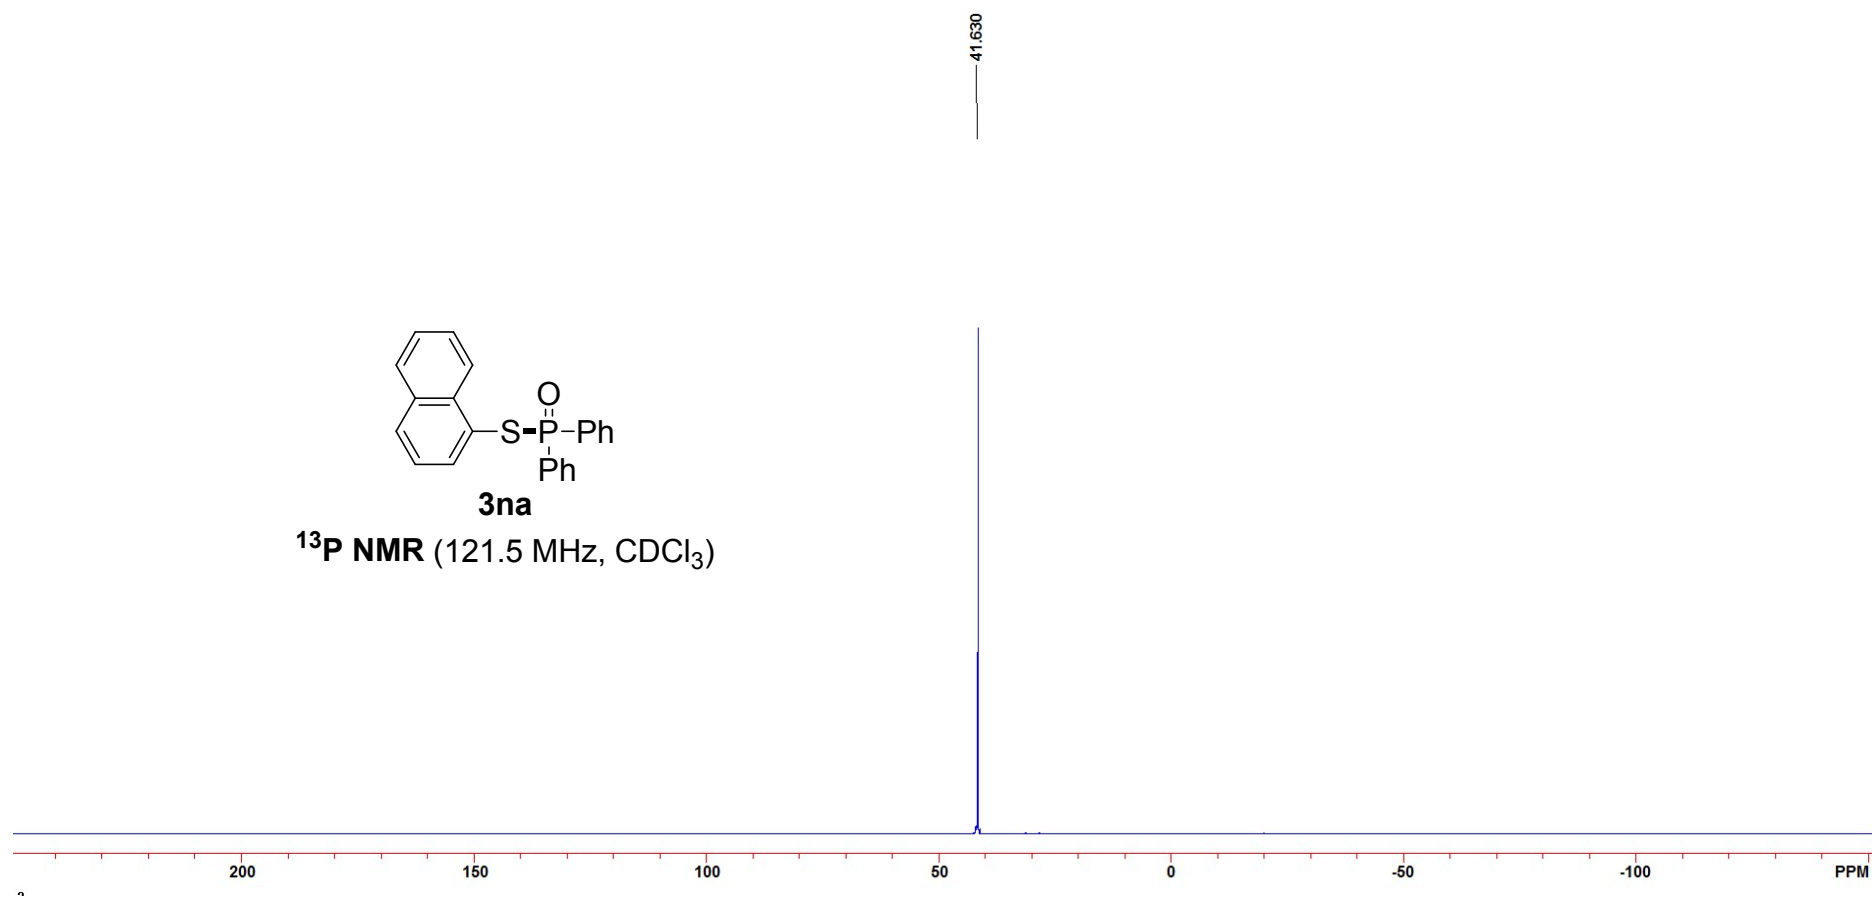

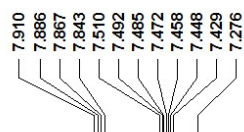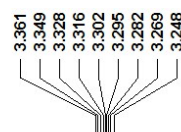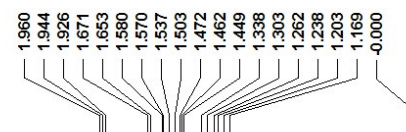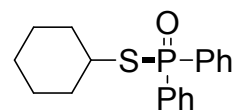

**3oa**

<sup>1</sup>H NMR (300 MHz, CDCl<sub>3</sub>)

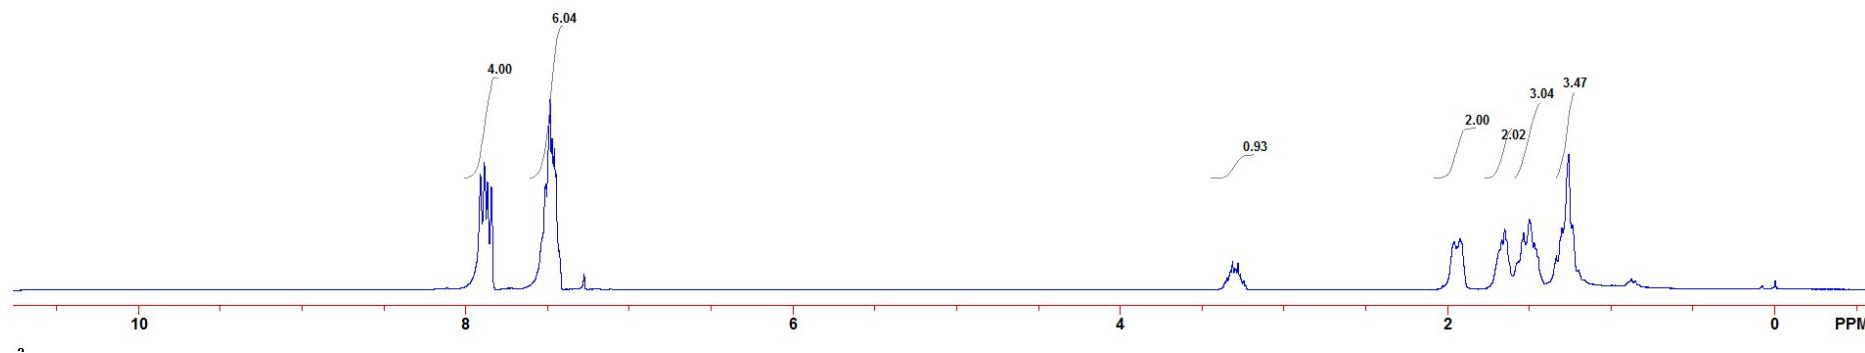

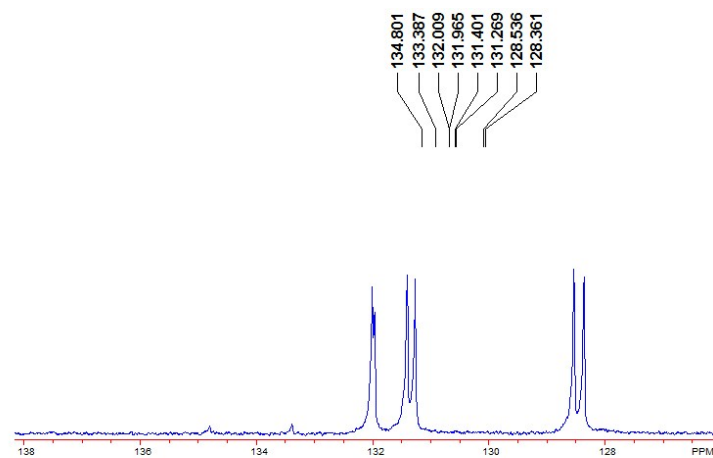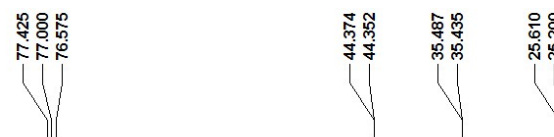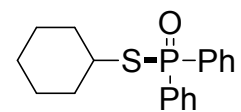

**3a**

**<sup>13</sup>C NMR (75 MHz, CDCl<sub>3</sub>)**

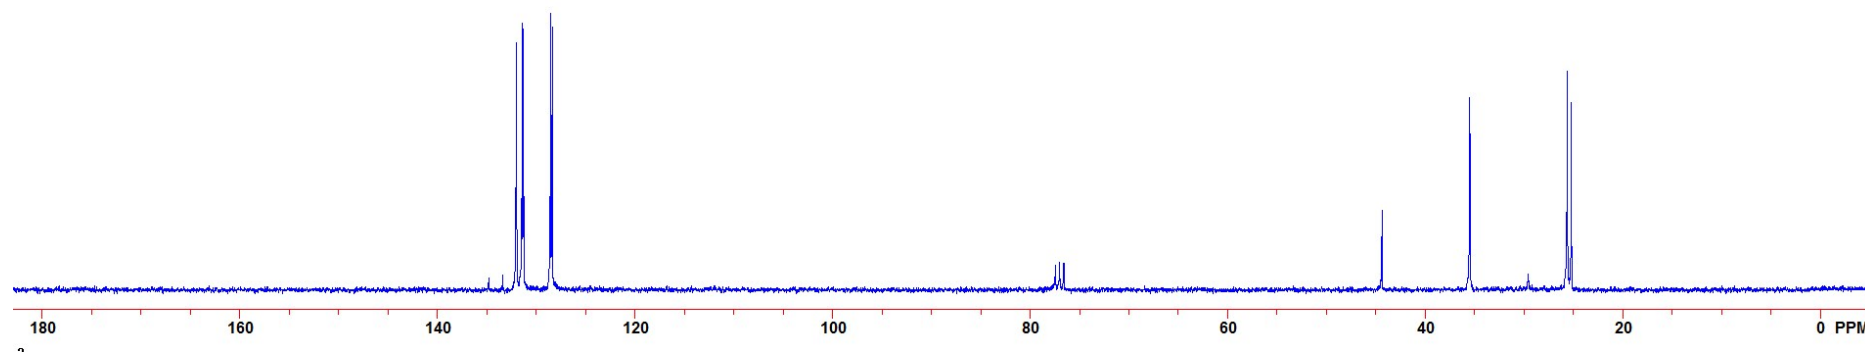



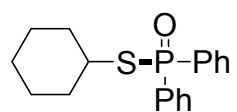

**3oa**

**<sup>31</sup>P NMR** (121.5 MHz, CDCl<sub>3</sub>)

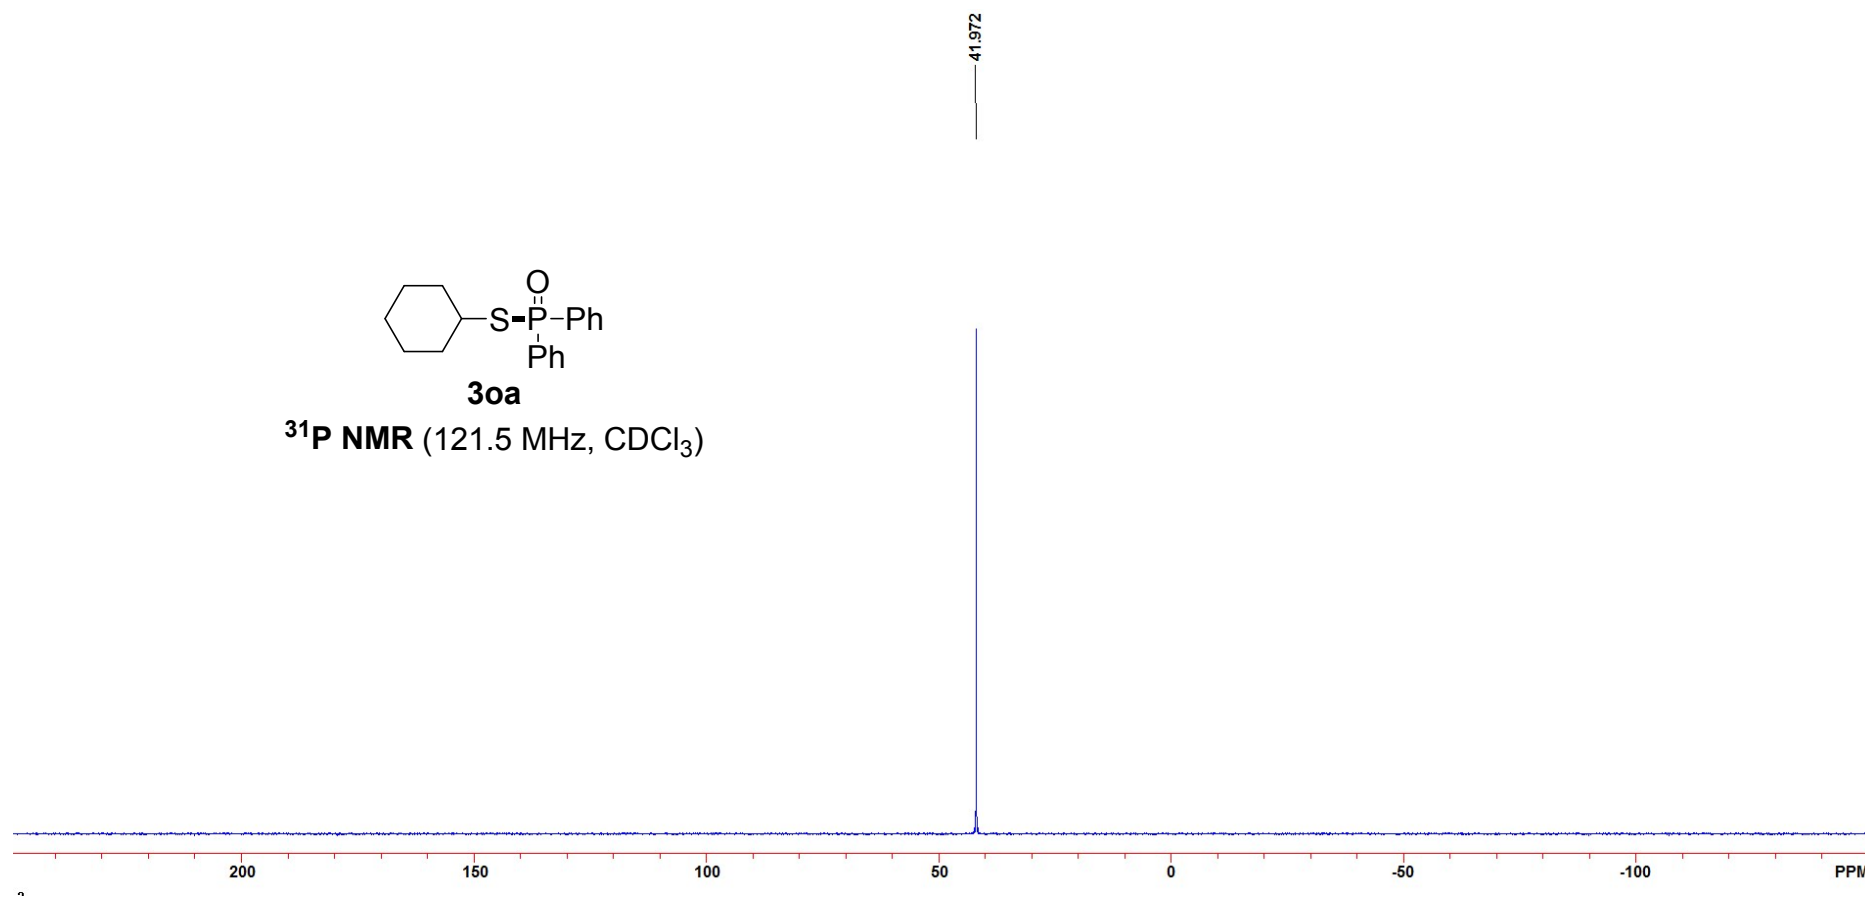

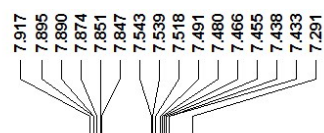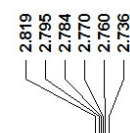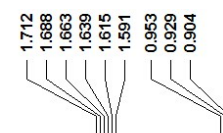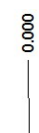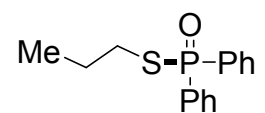

**3pa**

**<sup>1</sup>H NMR (300 MHz, CDCl<sub>3</sub>)**

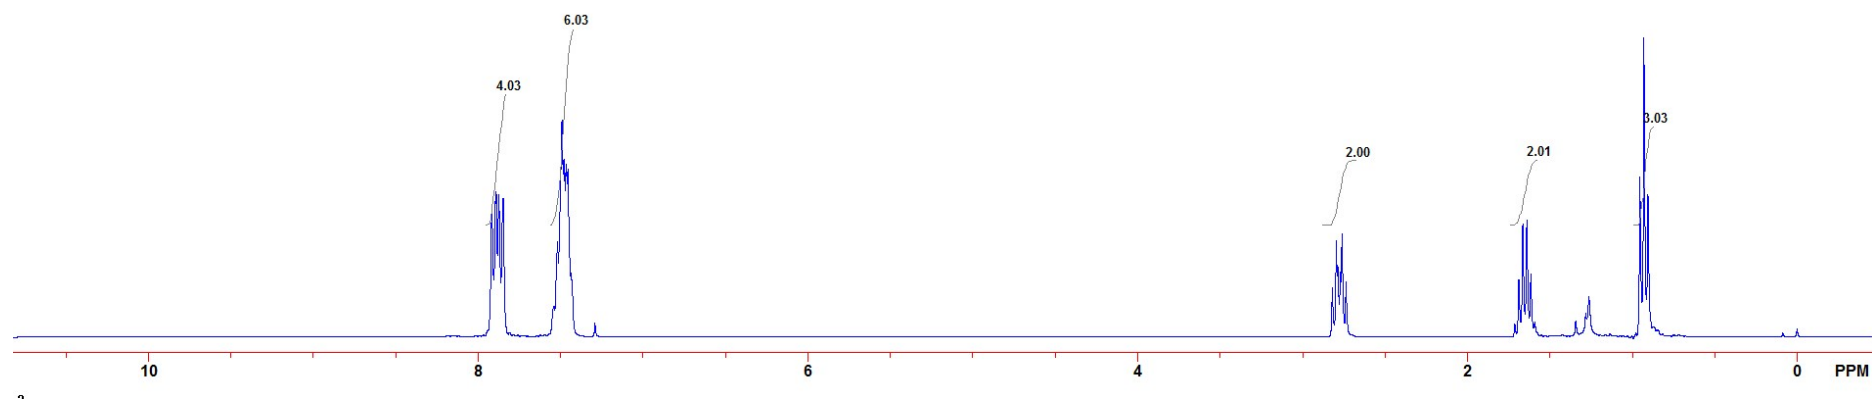

134.149  
132.727  
132.119  
132.075  
131.401  
131.262  
128.595  
128.427

77.425  
77.000  
76.582

31.112  
31.083

23.947  
23.881

13.096

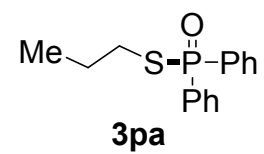

<sup>13</sup>C NMR (125 MHz, CDCl<sub>3</sub>)

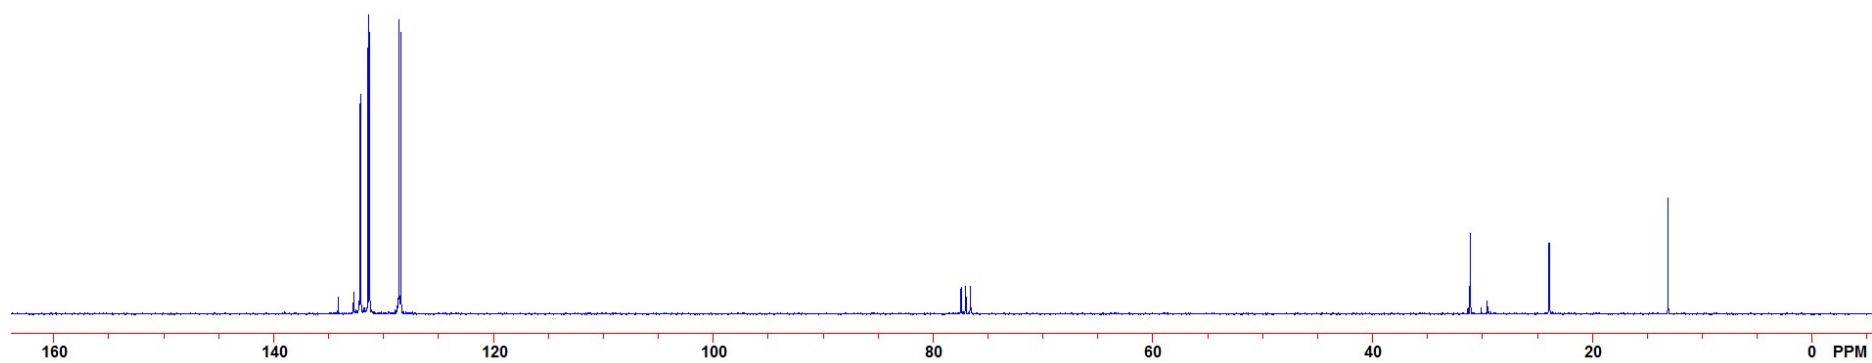

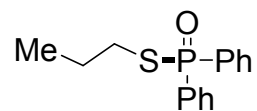

**3pa**

**$^{31}\text{P}$  NMR (121.5 MHz,  $\text{CDCl}_3$ )**

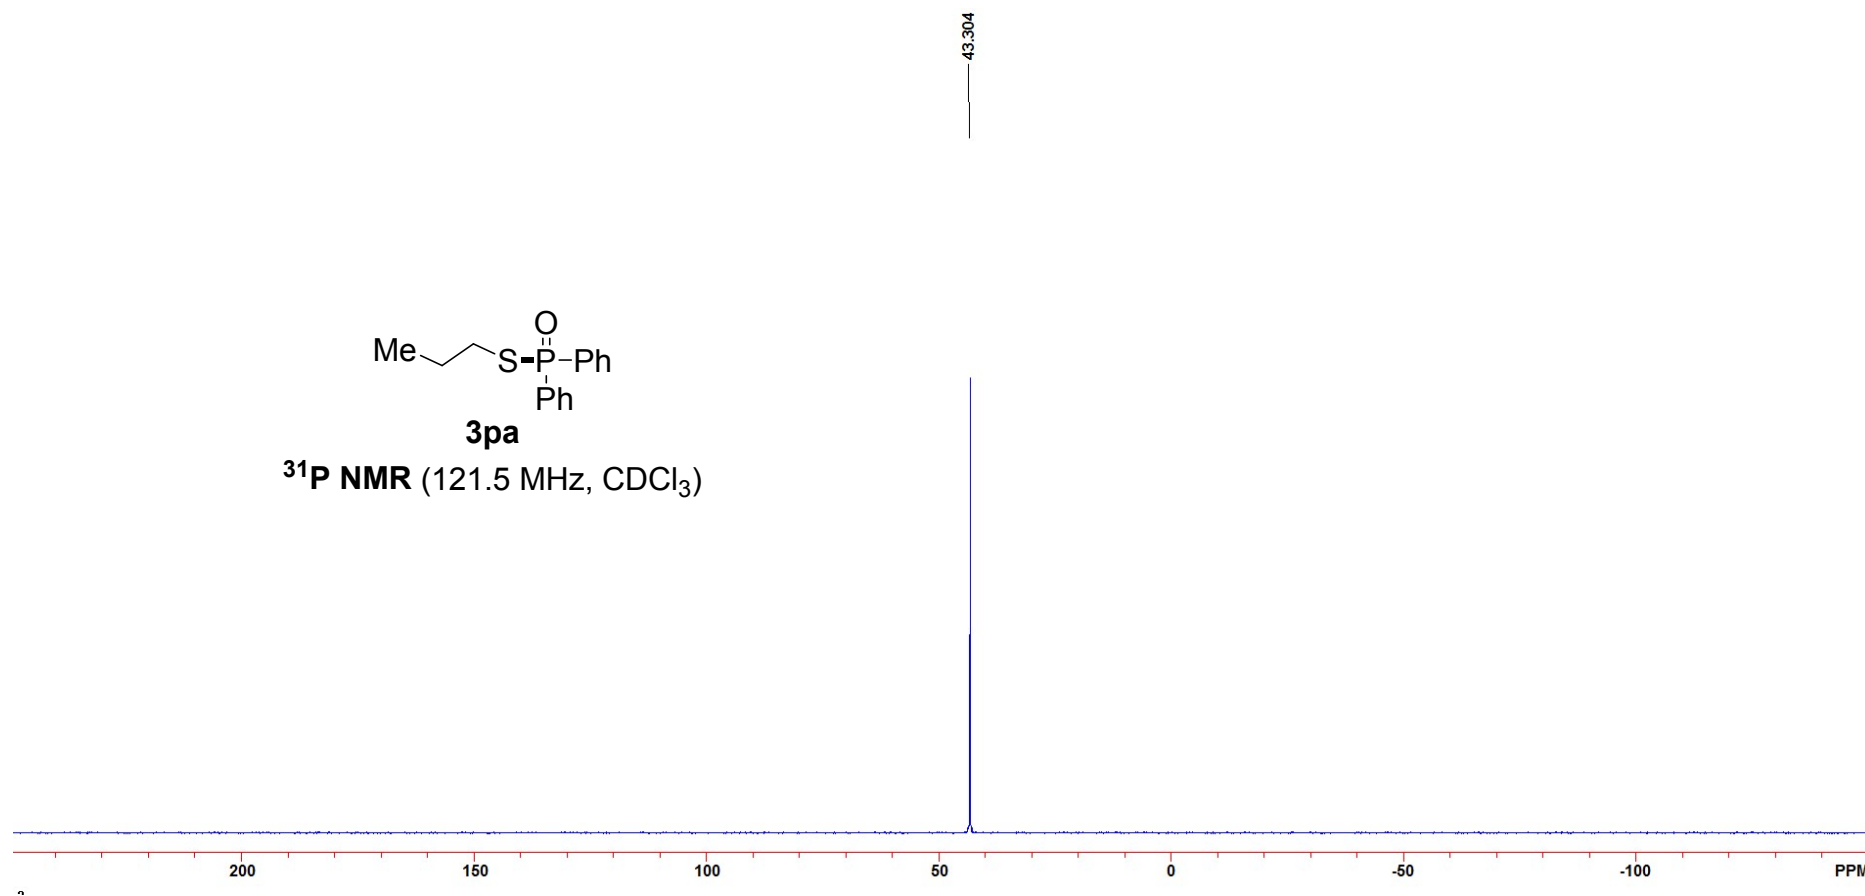

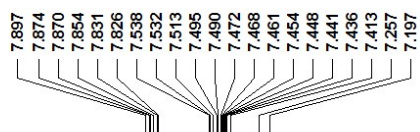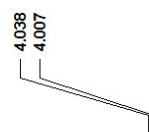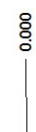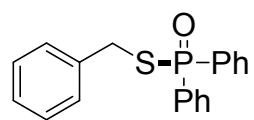

**3qa**

<sup>1</sup>H NMR (300 MHz, CDCl<sub>3</sub>)

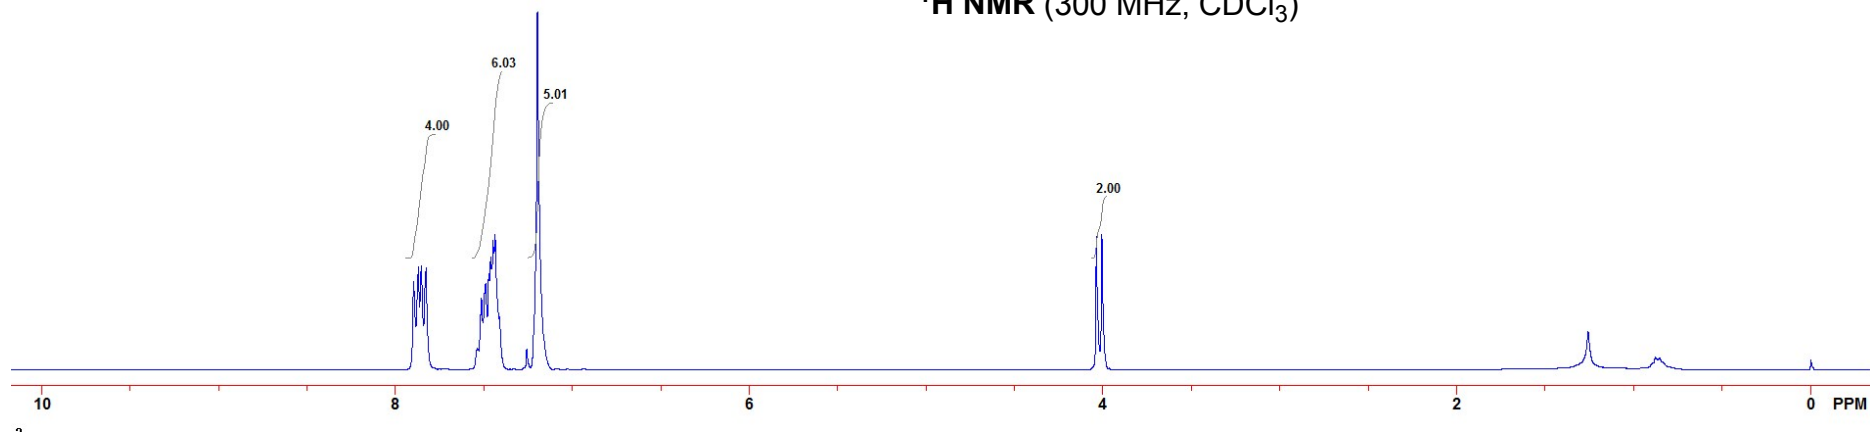

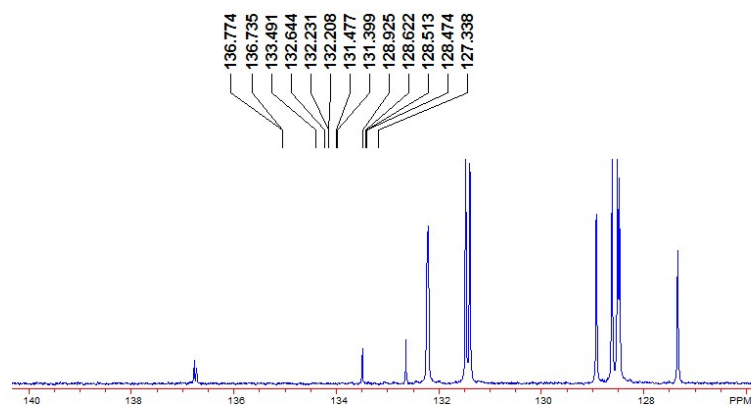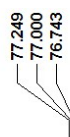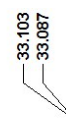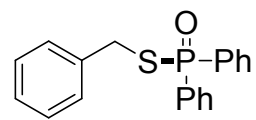

**3qa**

**$^{13}\text{C}$  NMR (125 MHz,  $\text{CDCl}_3$ )**

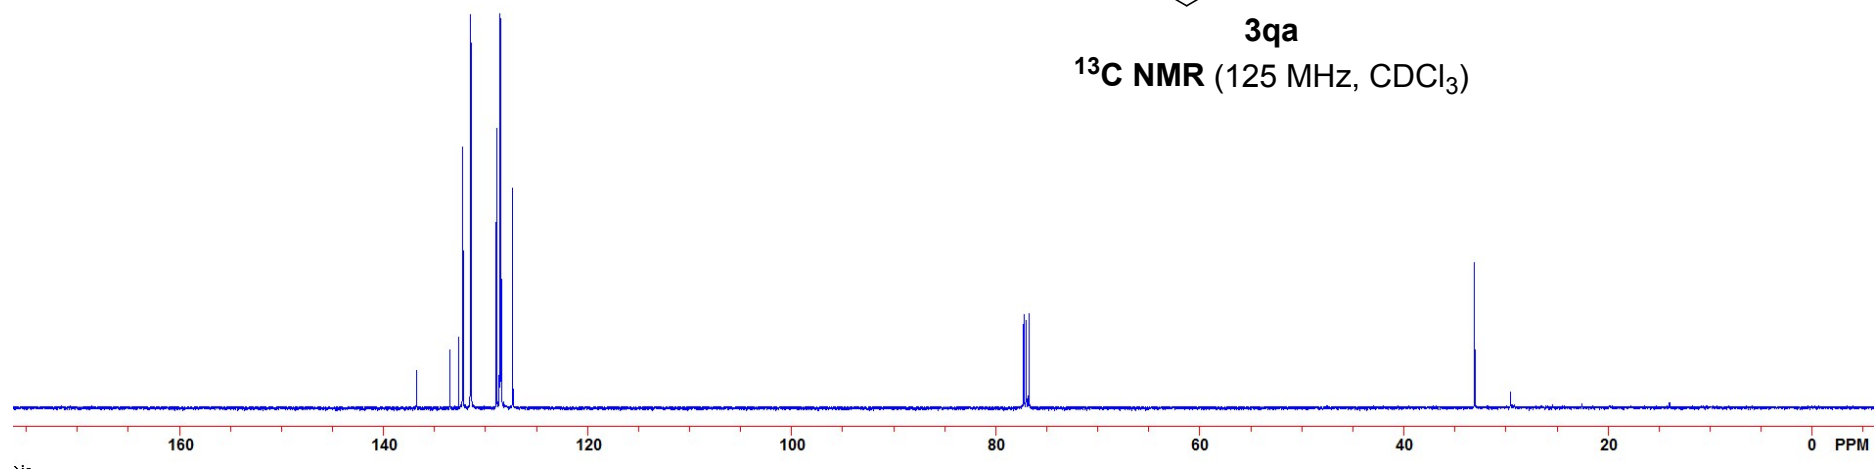

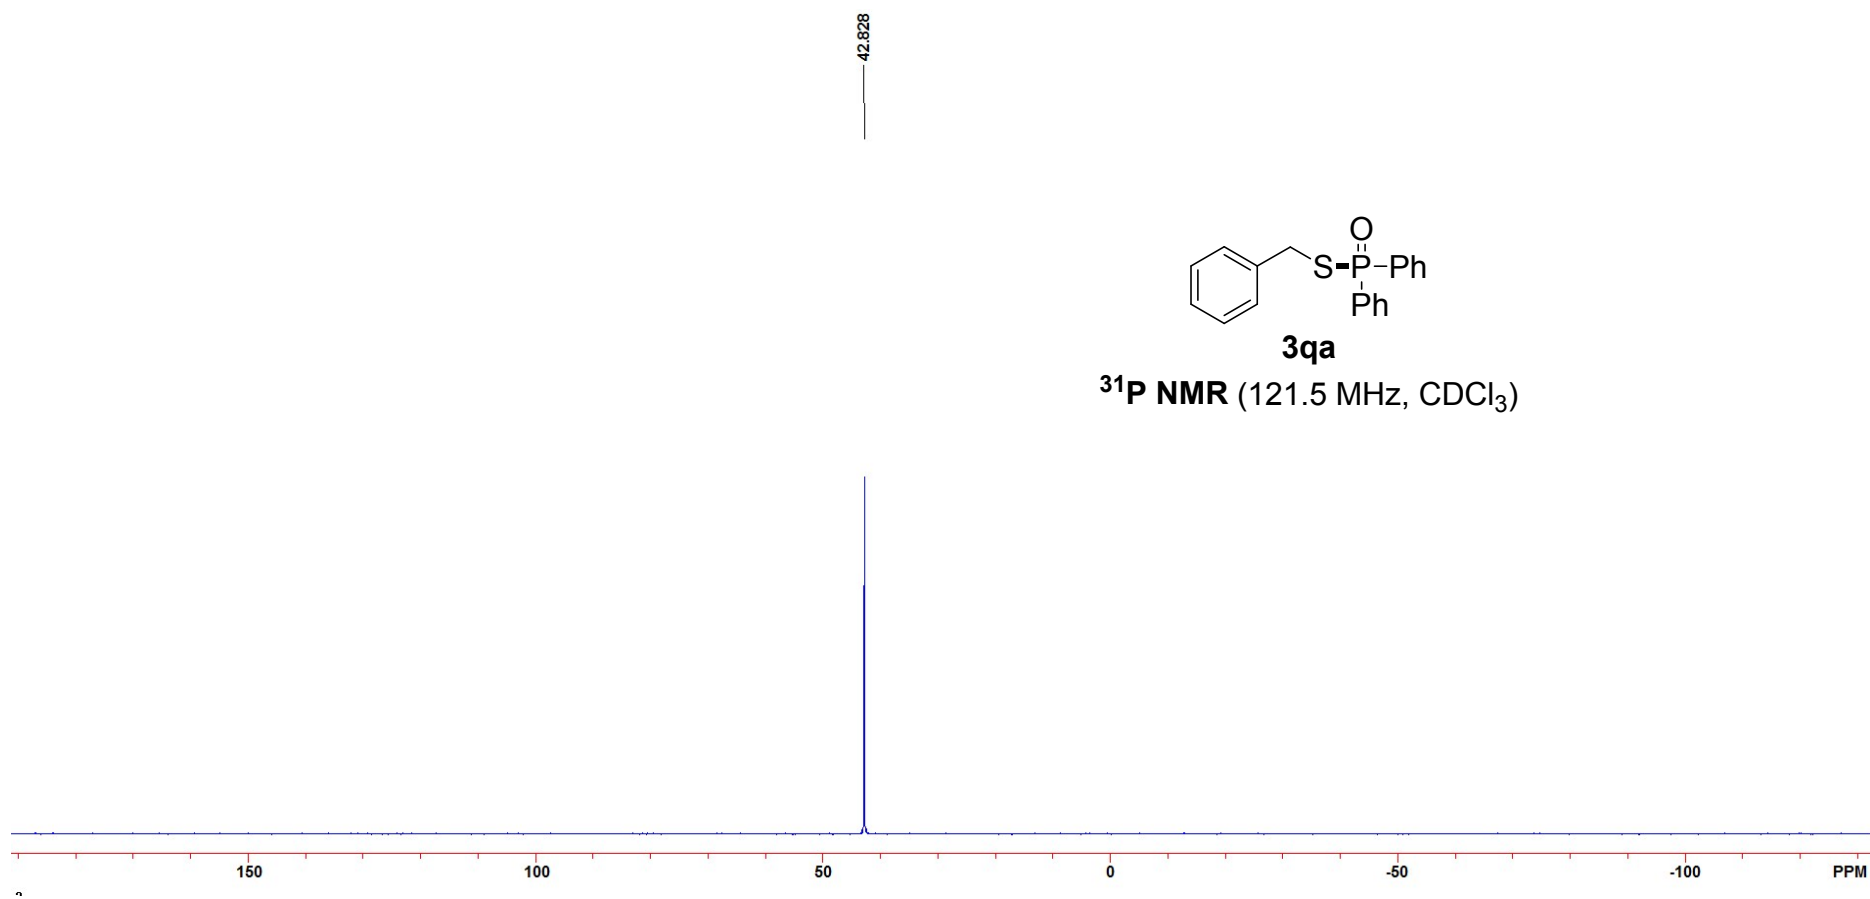

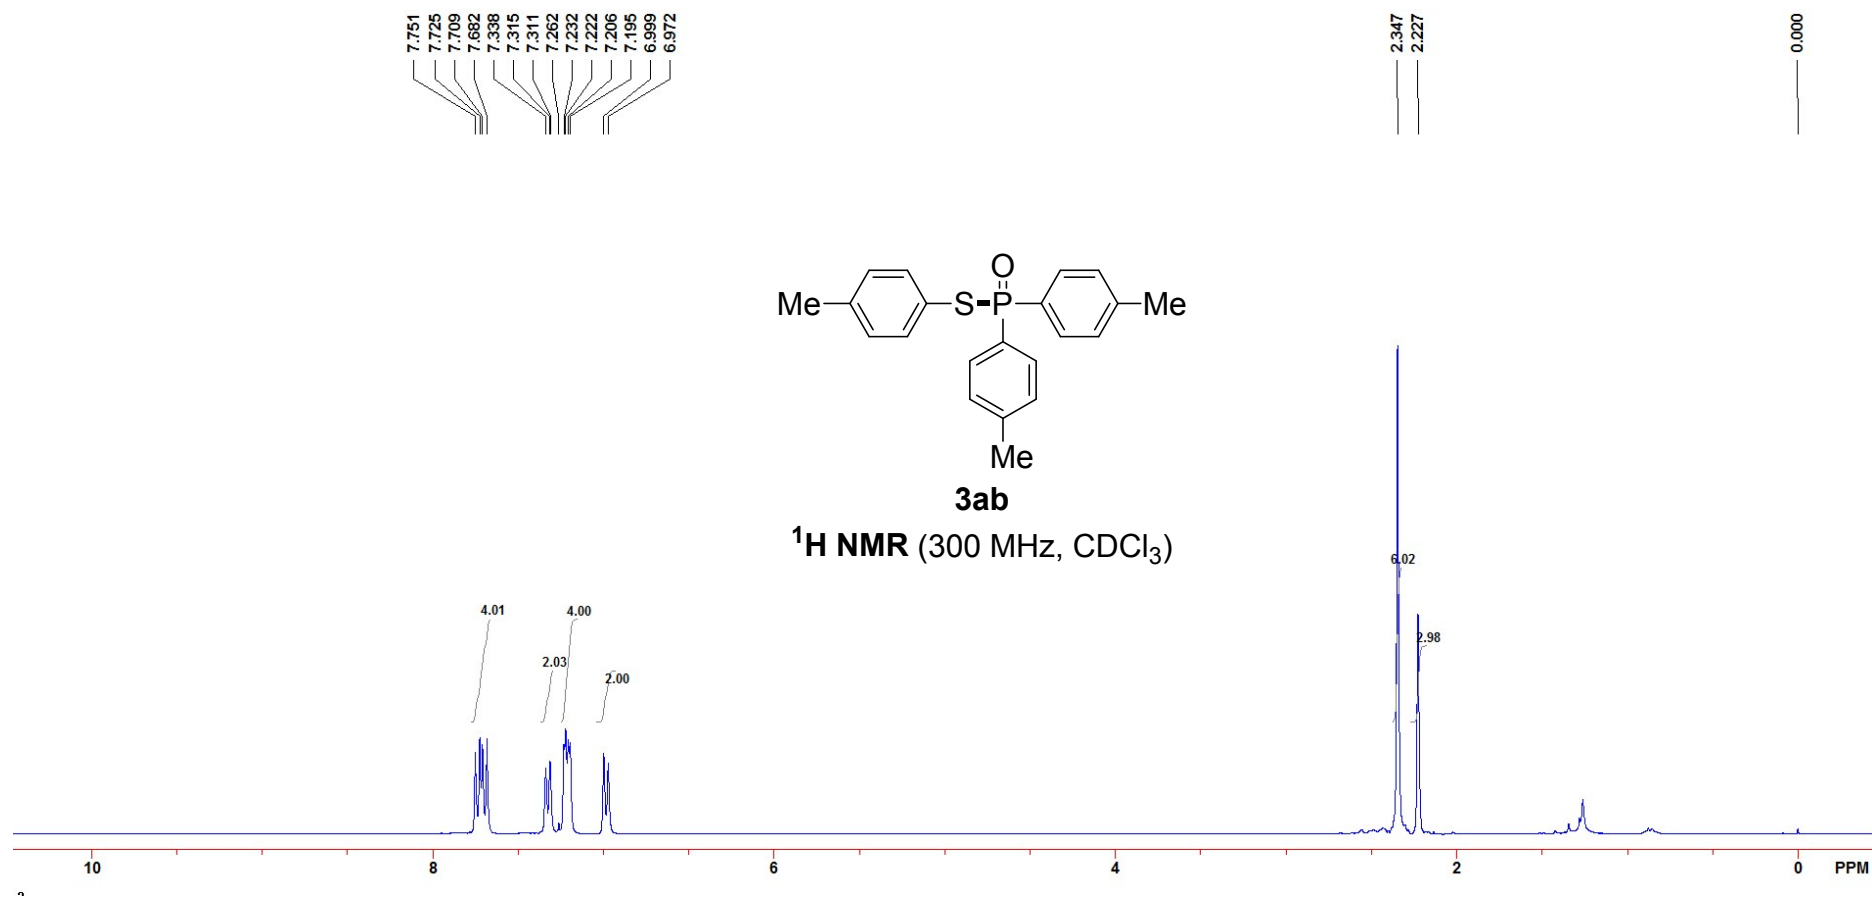



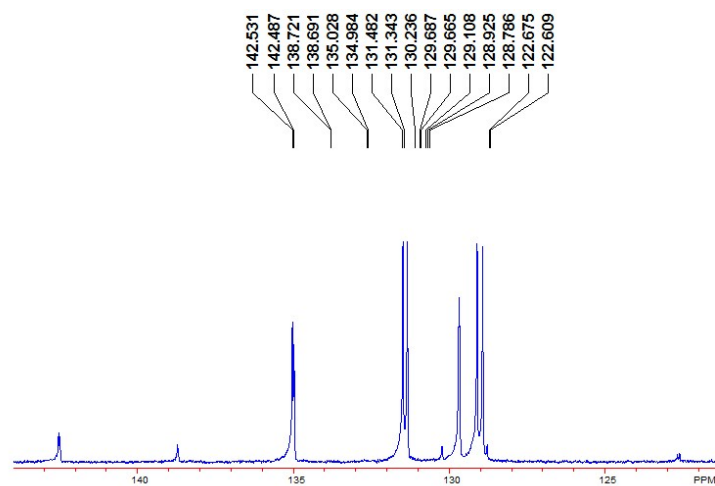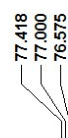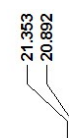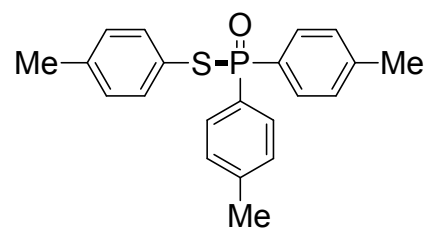

**3ab**

<sup>13</sup>C NMR (75 MHz, CDCl<sub>3</sub>)

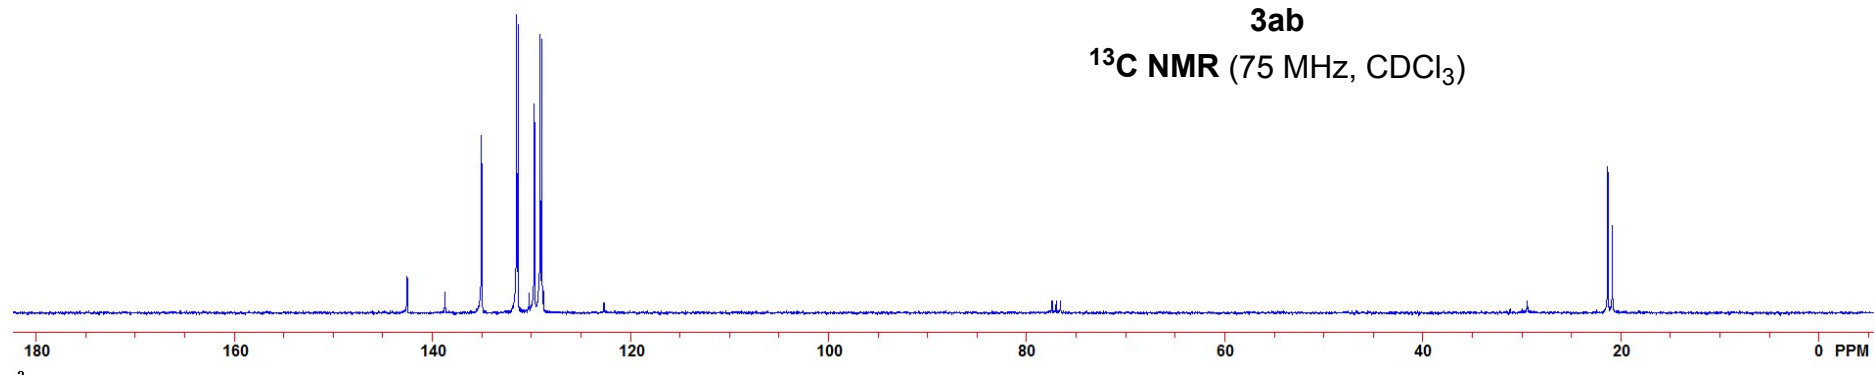

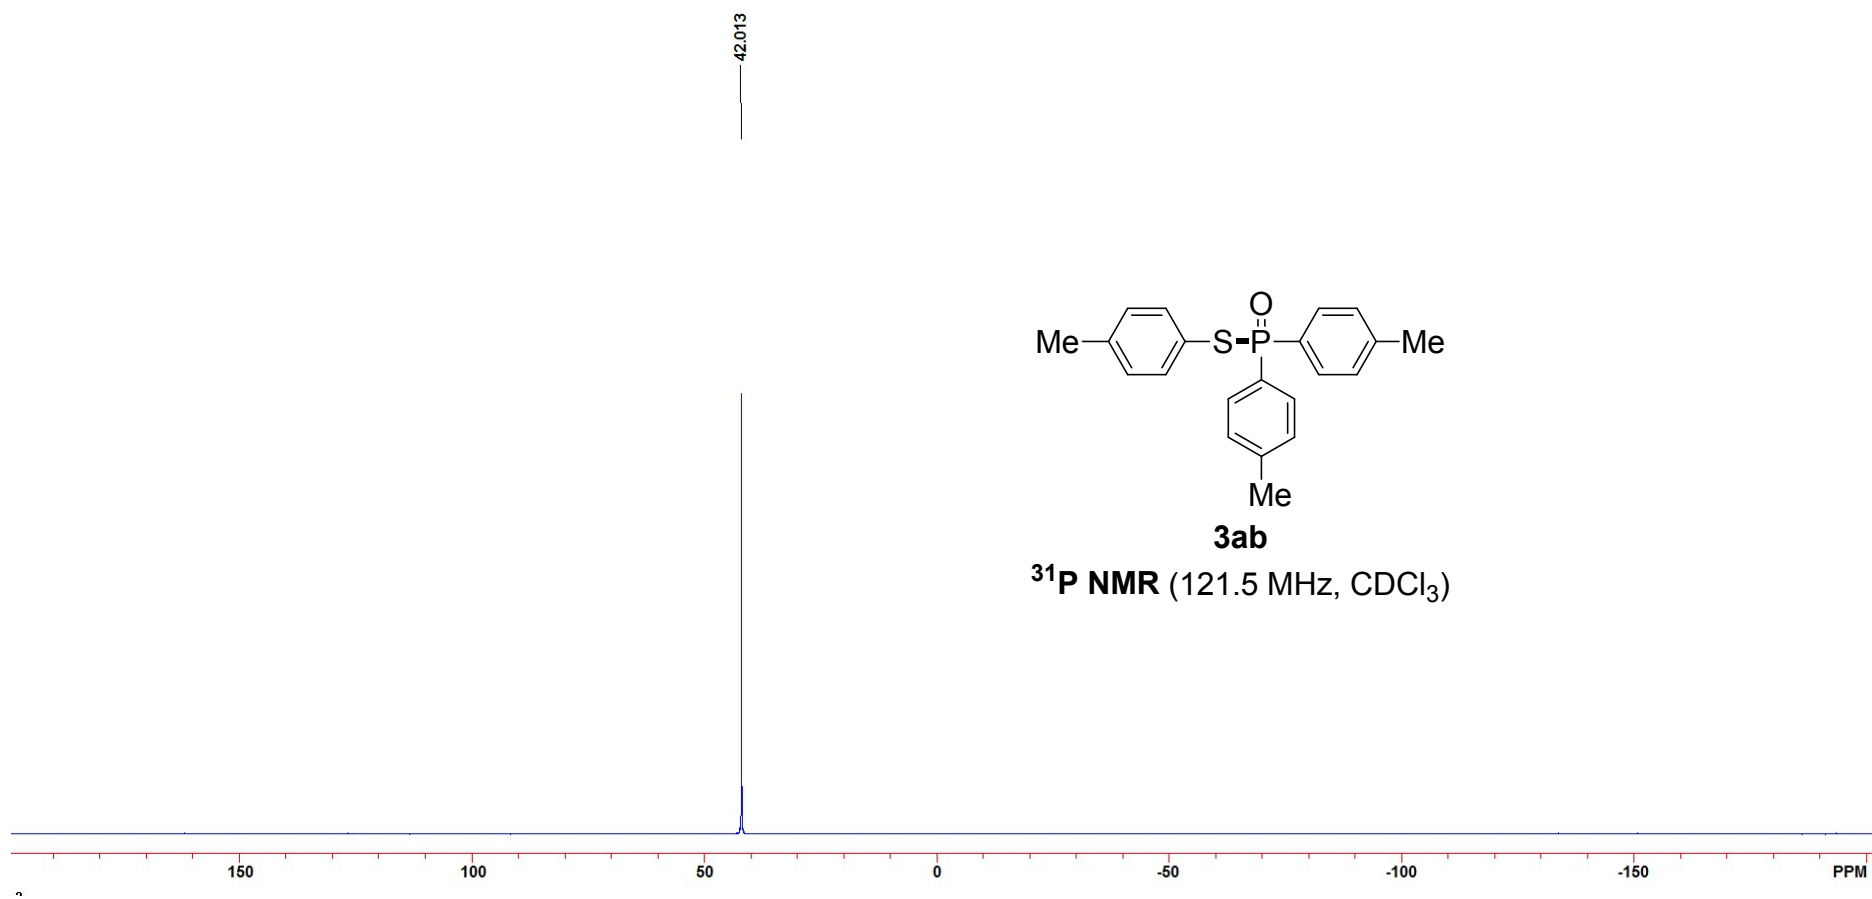

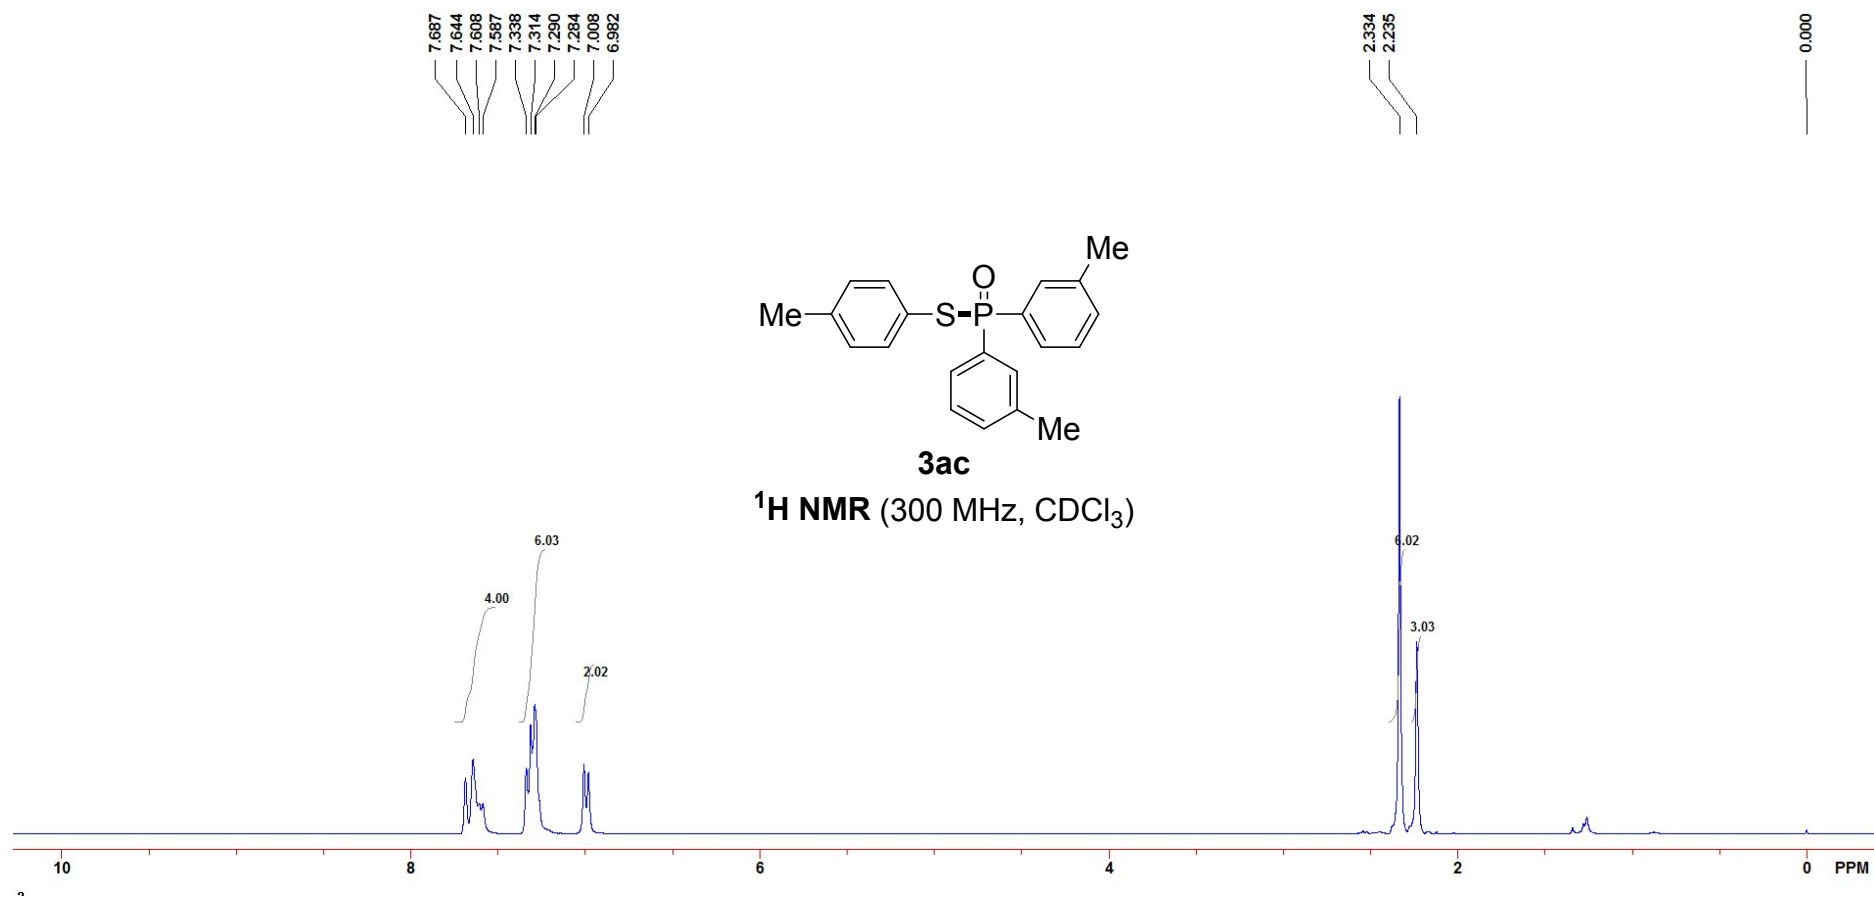

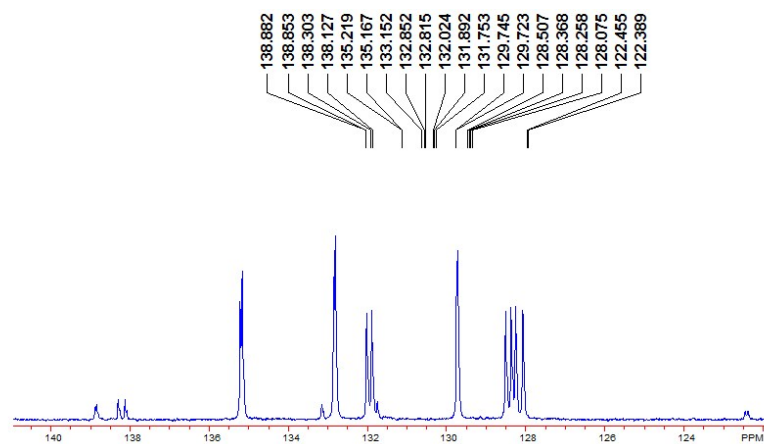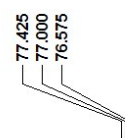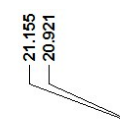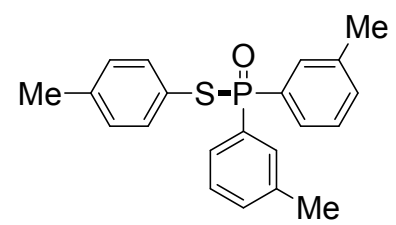

**3ac**

**$^{13}\text{C}$  NMR (75 MHz,  $\text{CDCl}_3$ )**

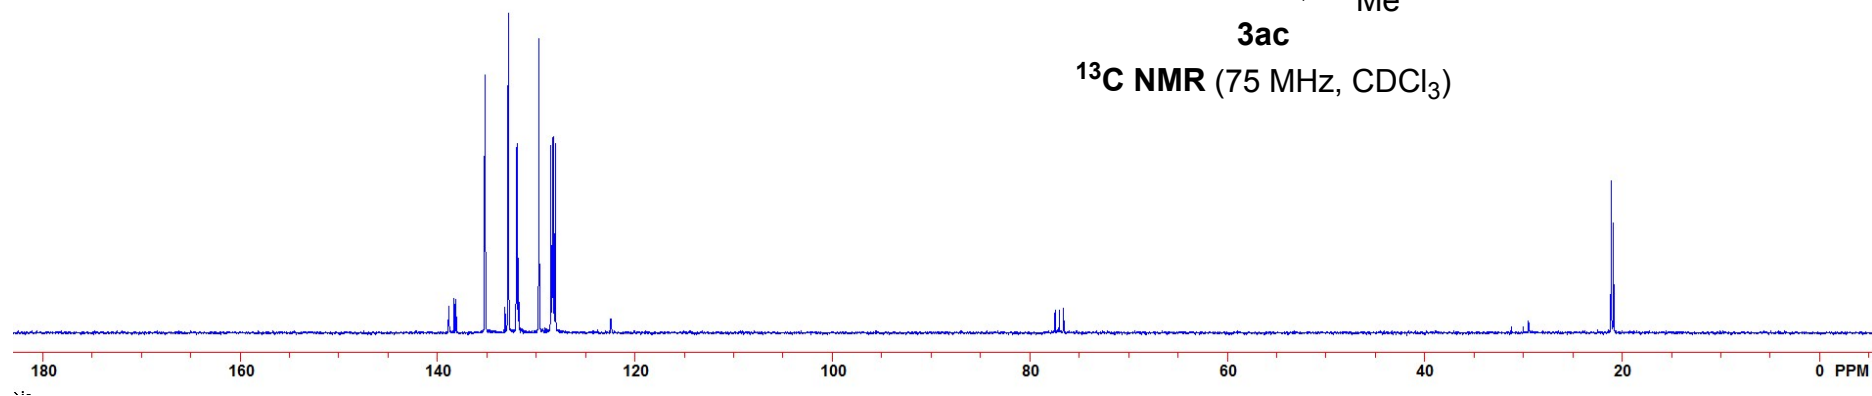

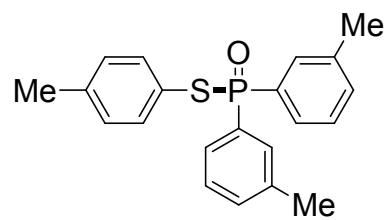

**3ac**

**$^{31}\text{P}$  NMR** (121.5 MHz,  $\text{CDCl}_3$ )

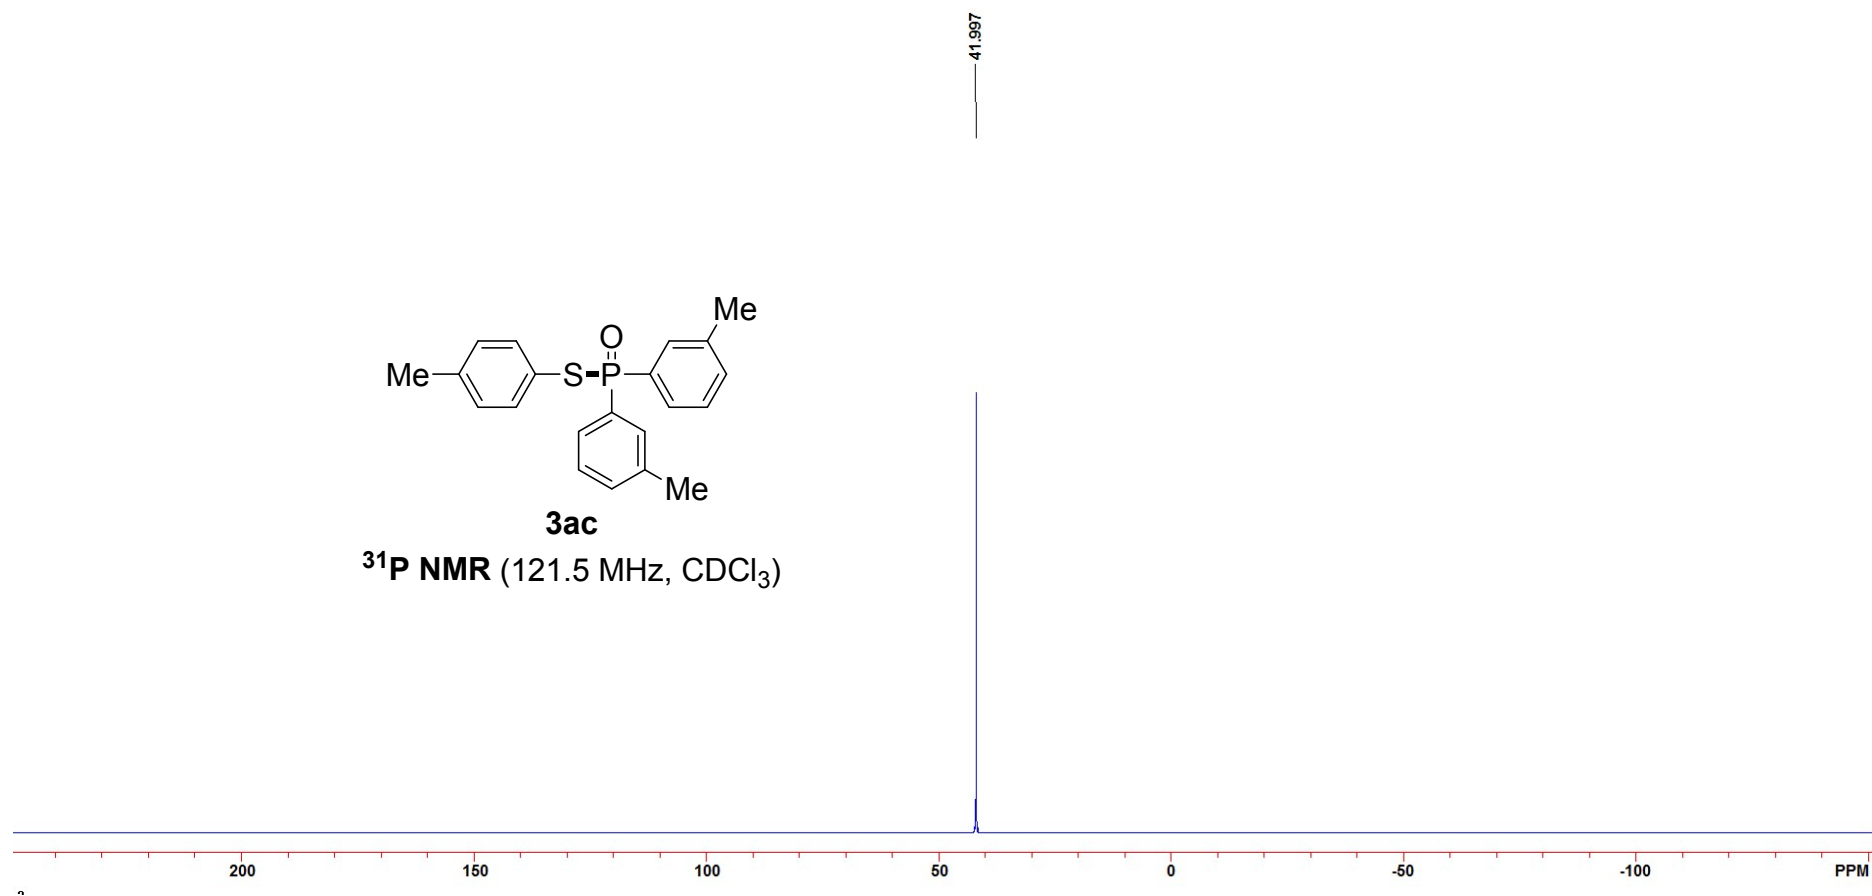

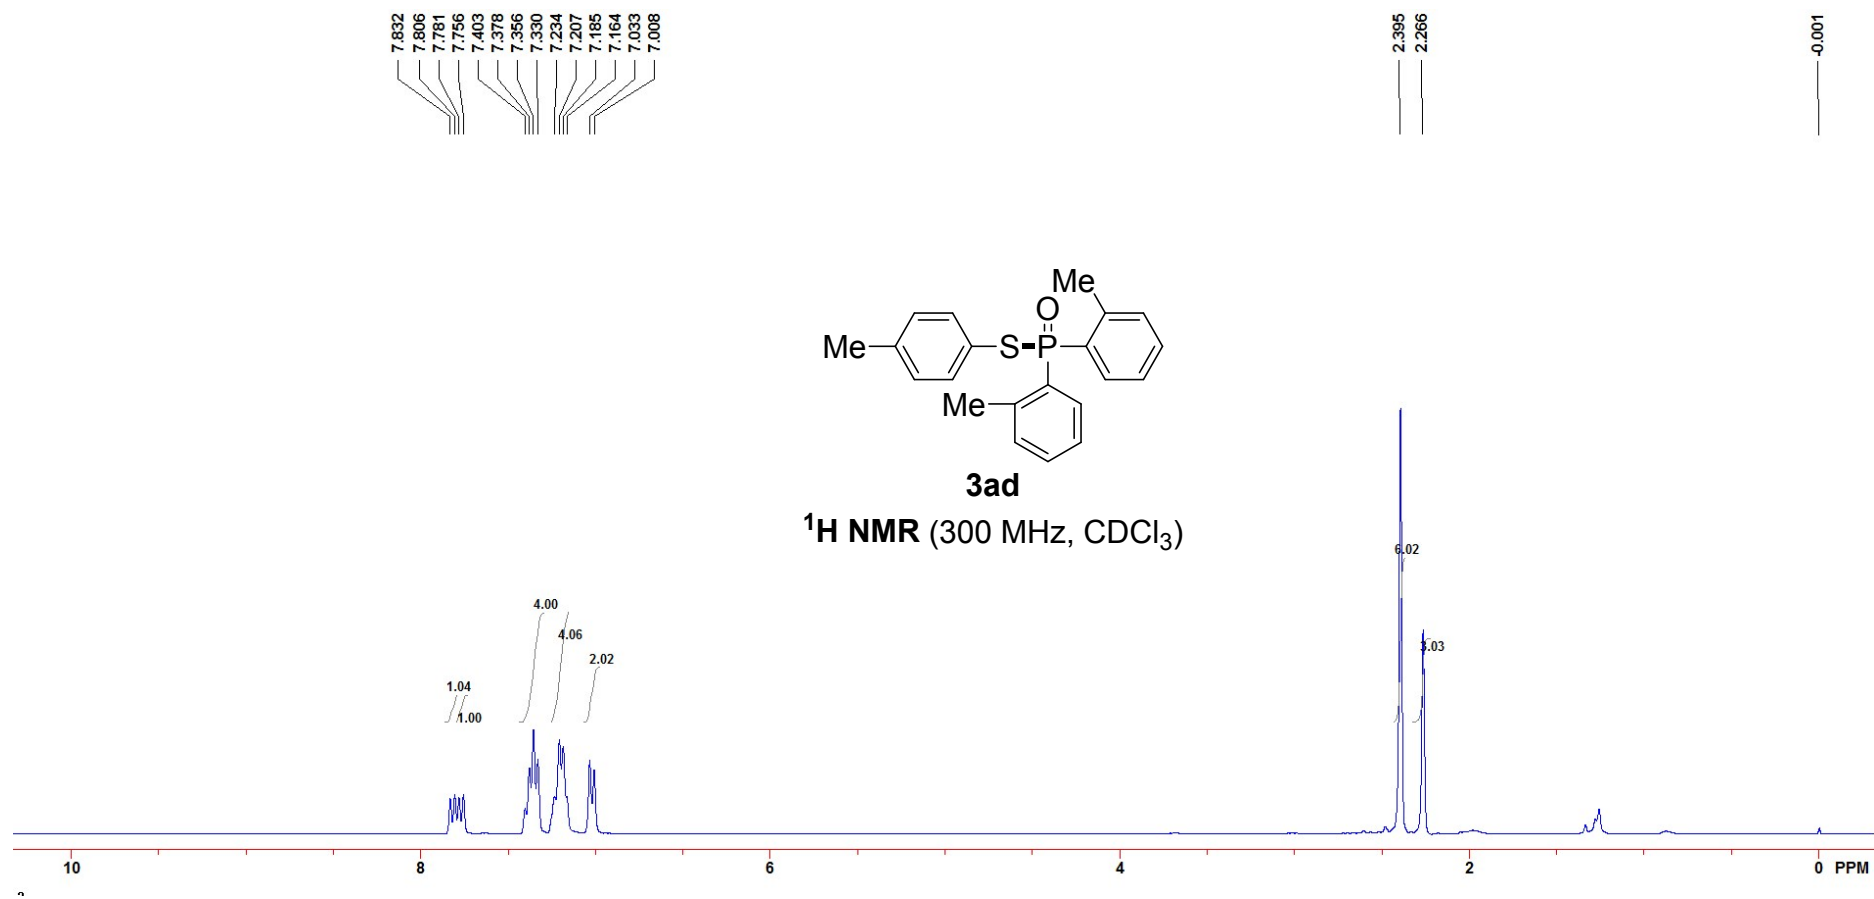

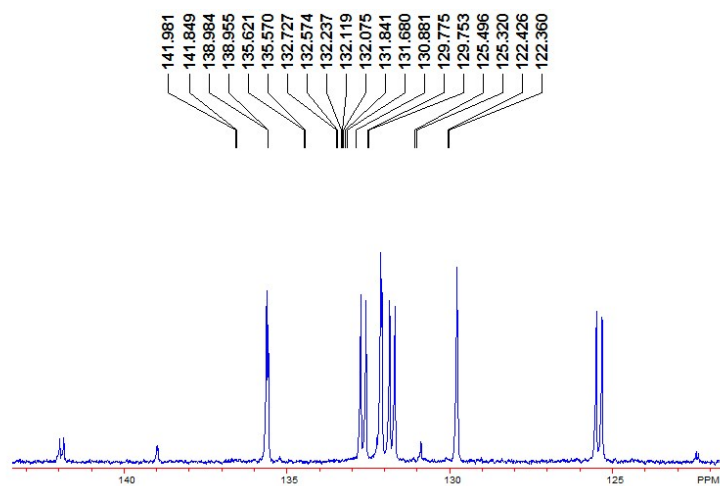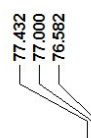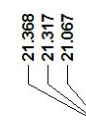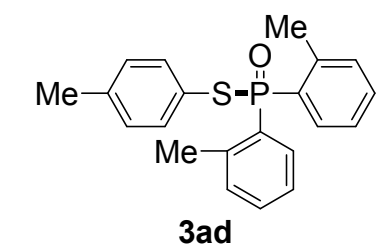

**<sup>13</sup>C NMR (75 MHz, CDCl<sub>3</sub>)**

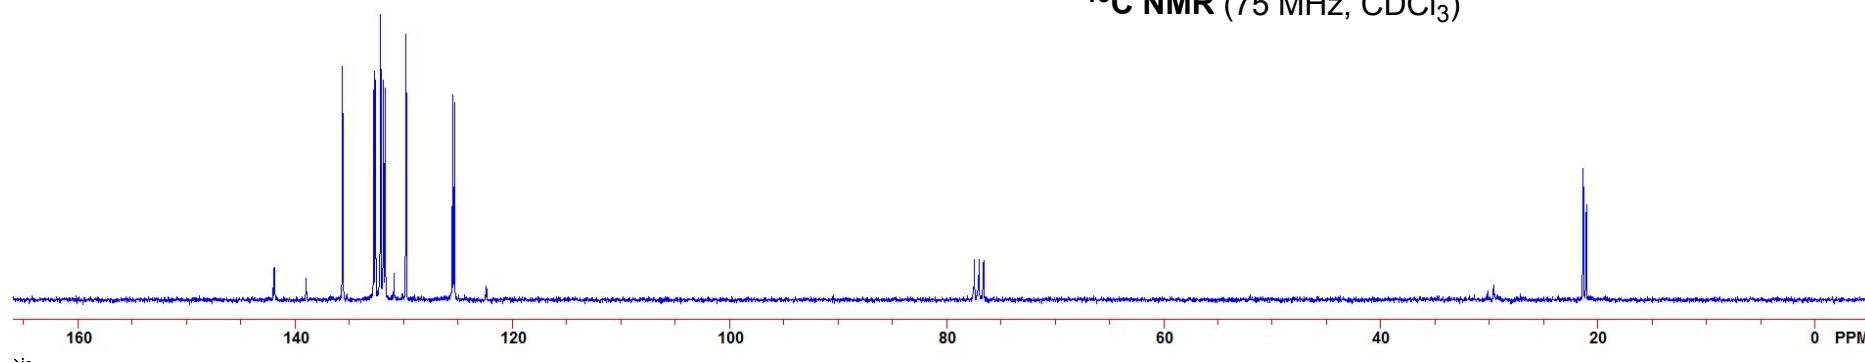

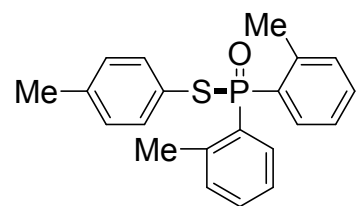

**3ad**

**$^{31}\text{P}$  NMR** (121.5 MHz,  $\text{CDCl}_3$ )

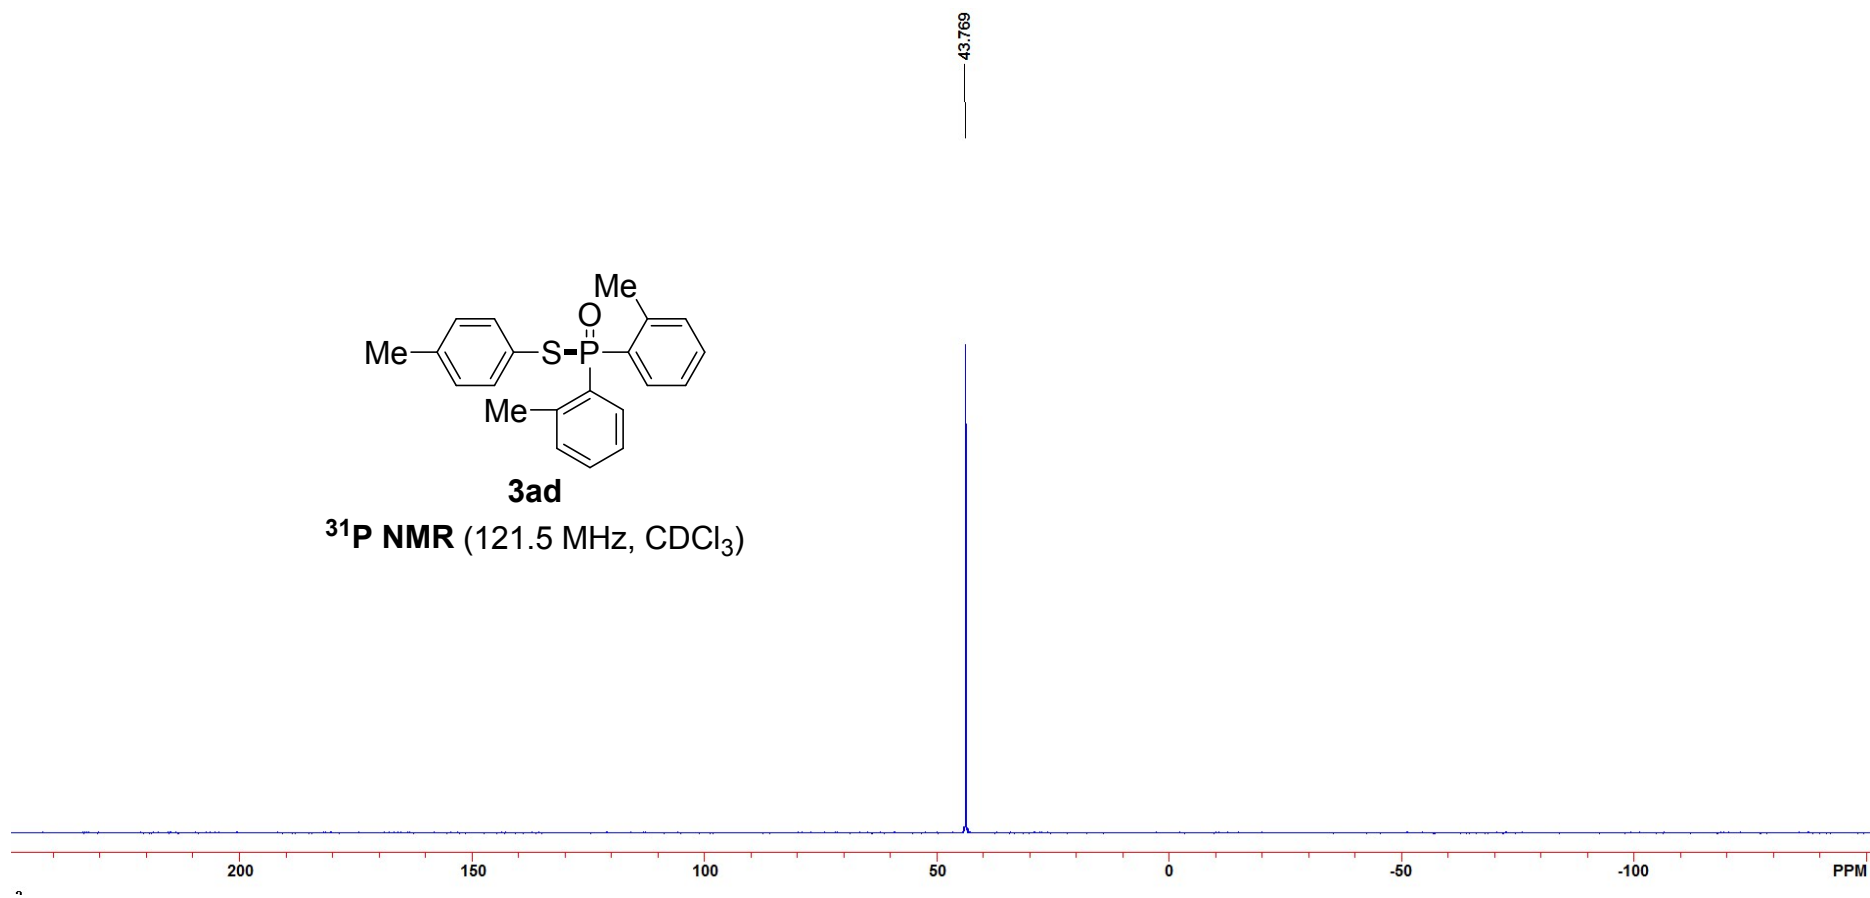



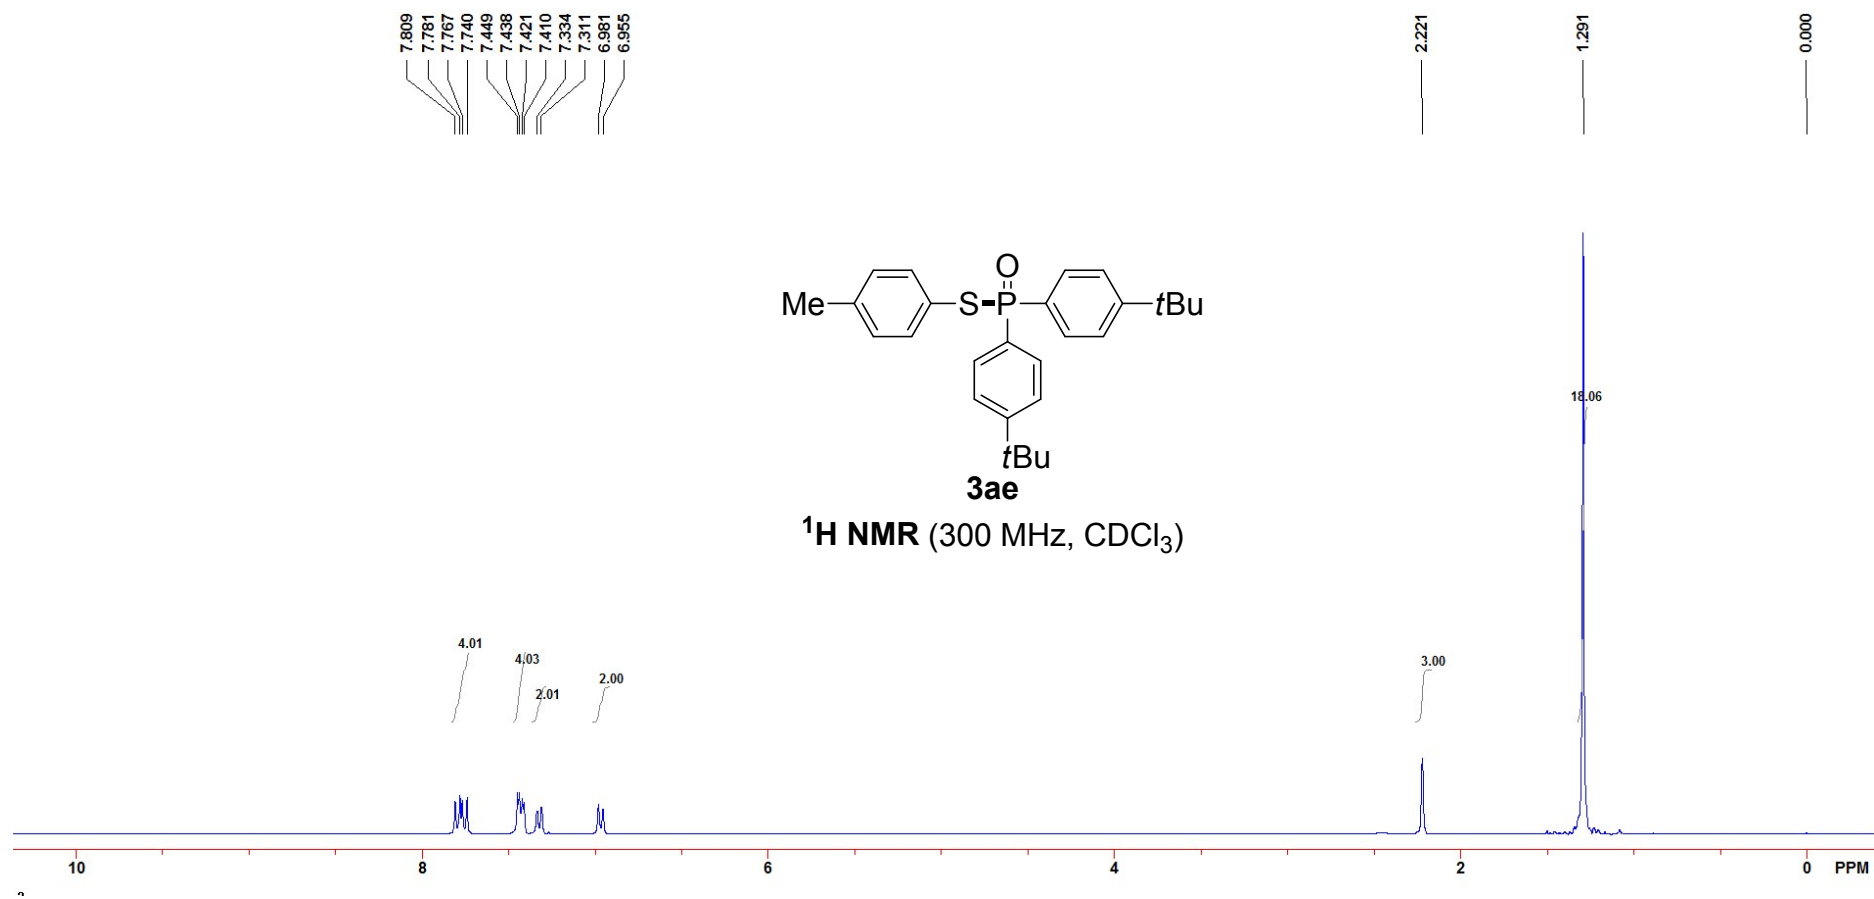

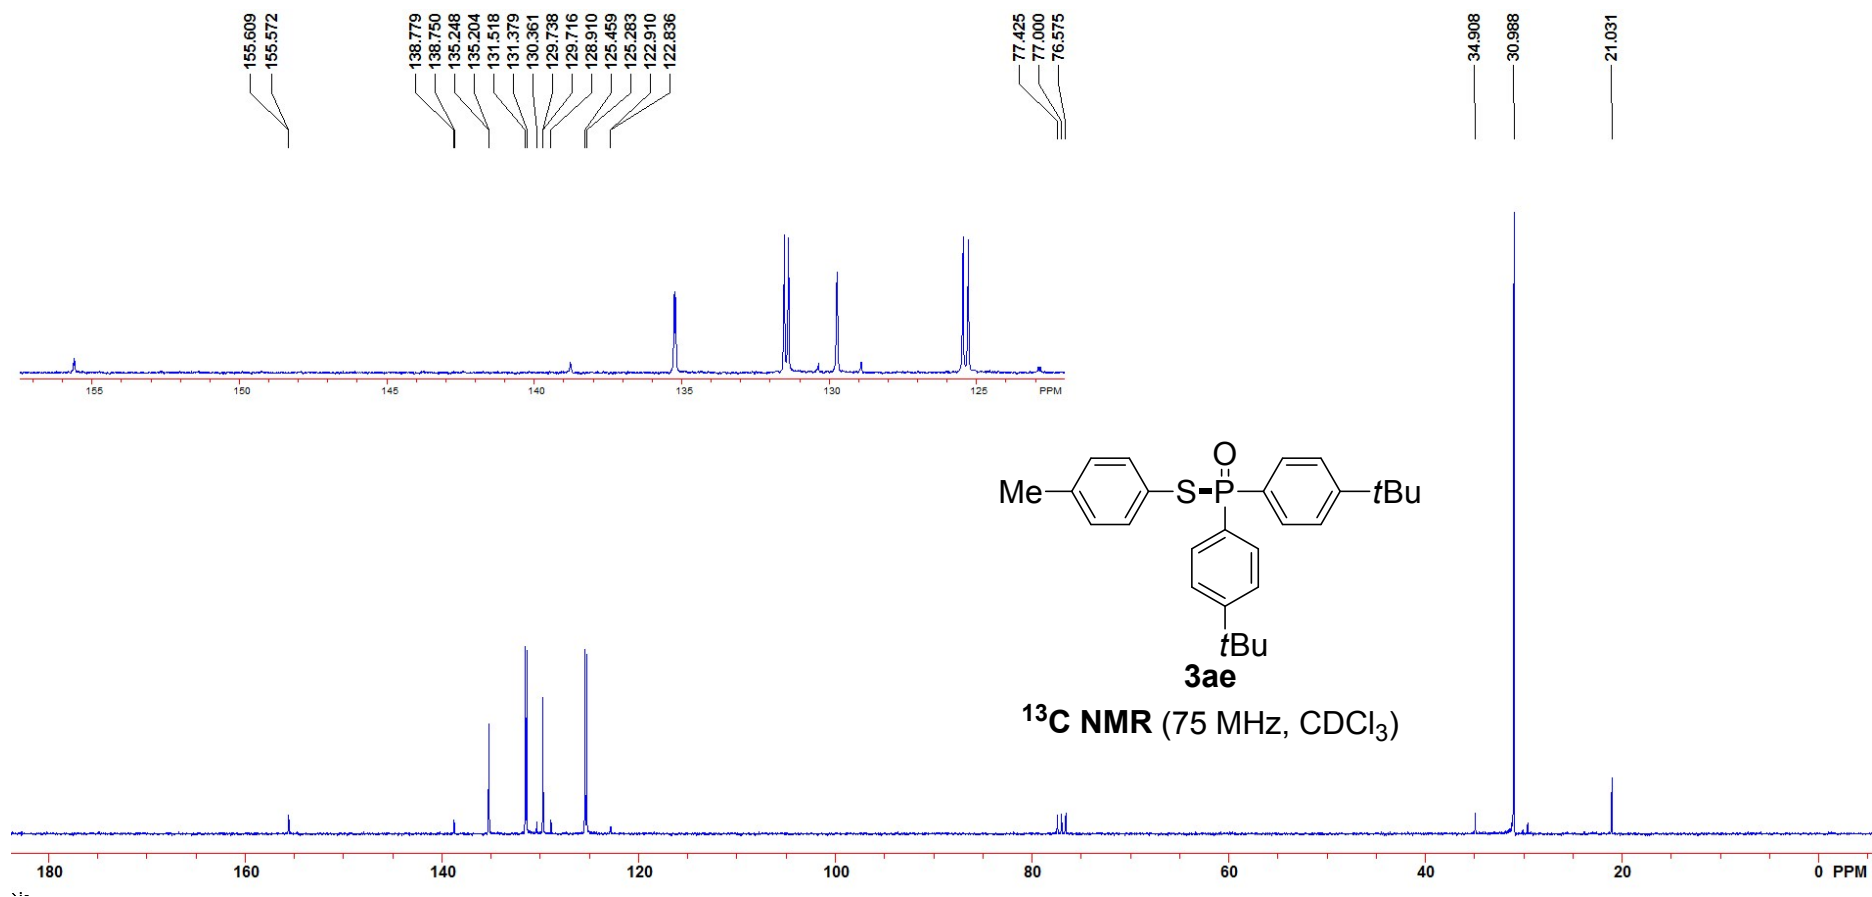

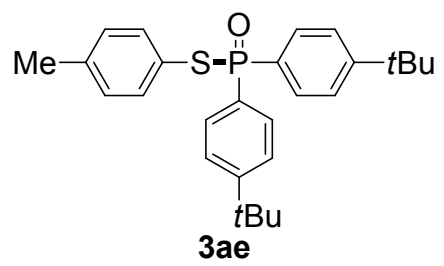

**$^{31}\text{P}$  NMR** (121.5 MHz,  $\text{CDCl}_3$ )

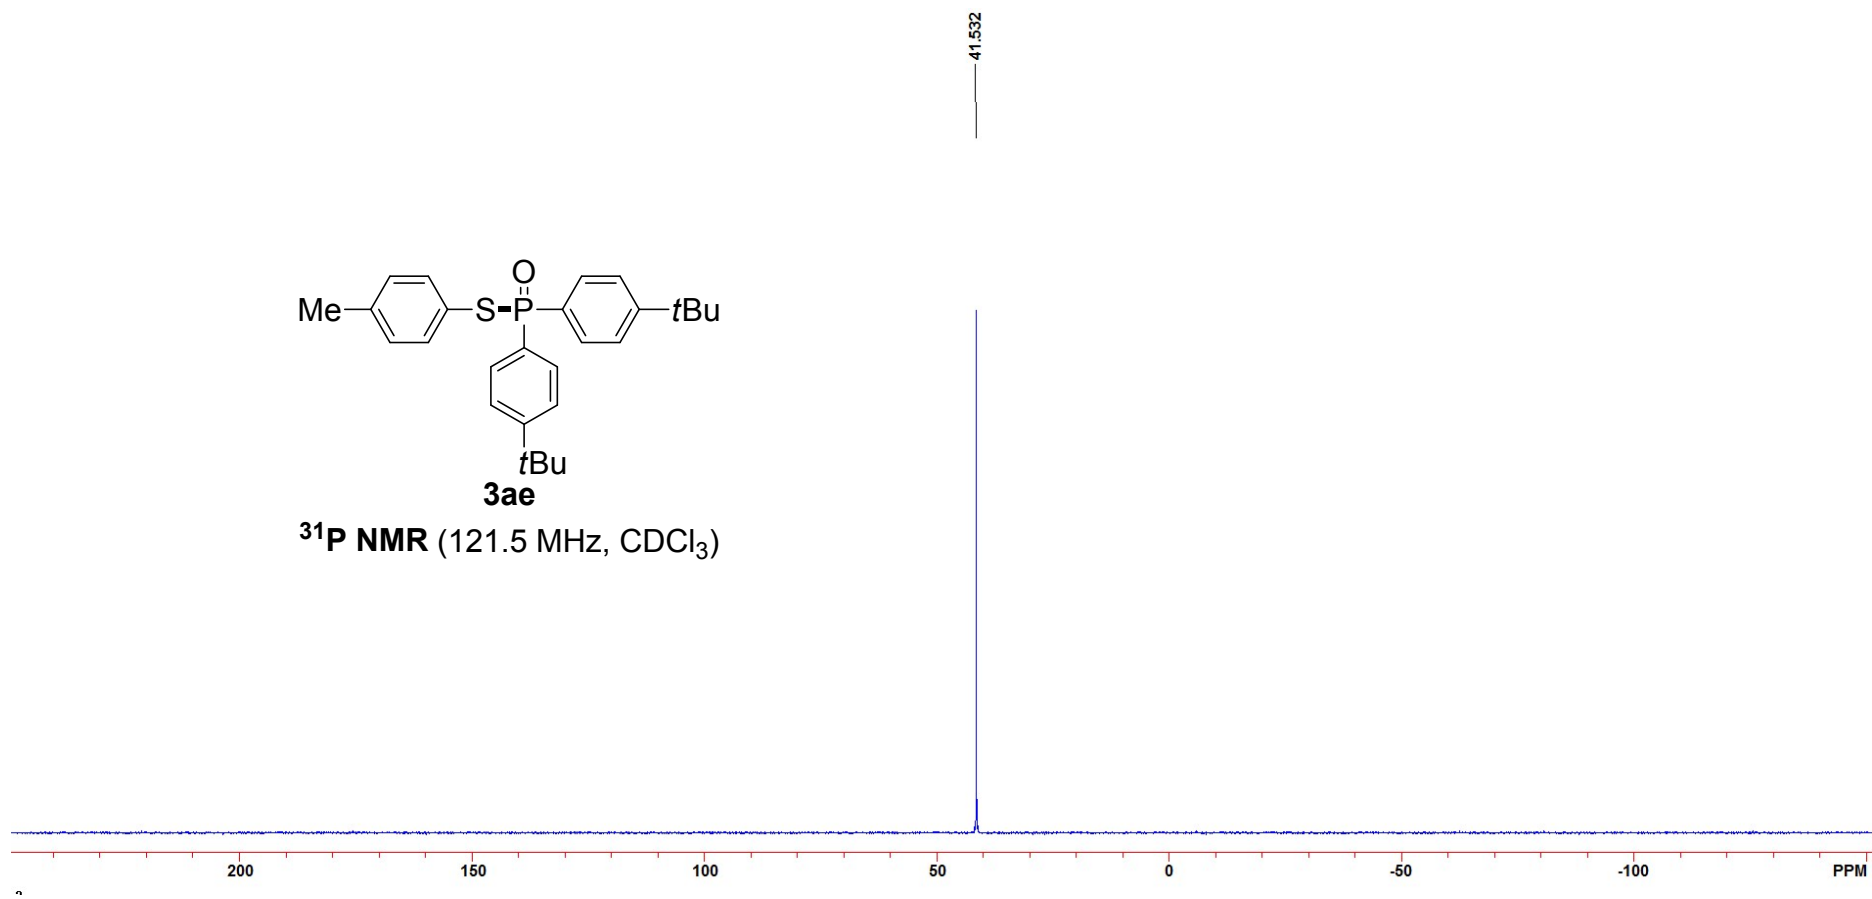

7.880  
7.861  
7.852  
7.839  
7.834  
7.821  
7.812  
7.792  
7.319  
7.296  
7.273  
7.160  
7.152  
7.131  
7.123  
7.102  
7.095  
7.034  
7.008

2.258

0.000

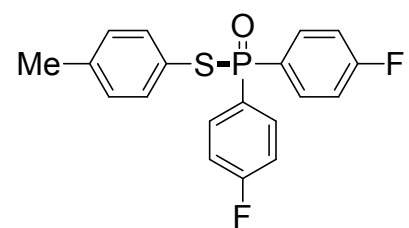

**3af**

<sup>1</sup>H NMR (300 MHz, CDCl<sub>3</sub>)

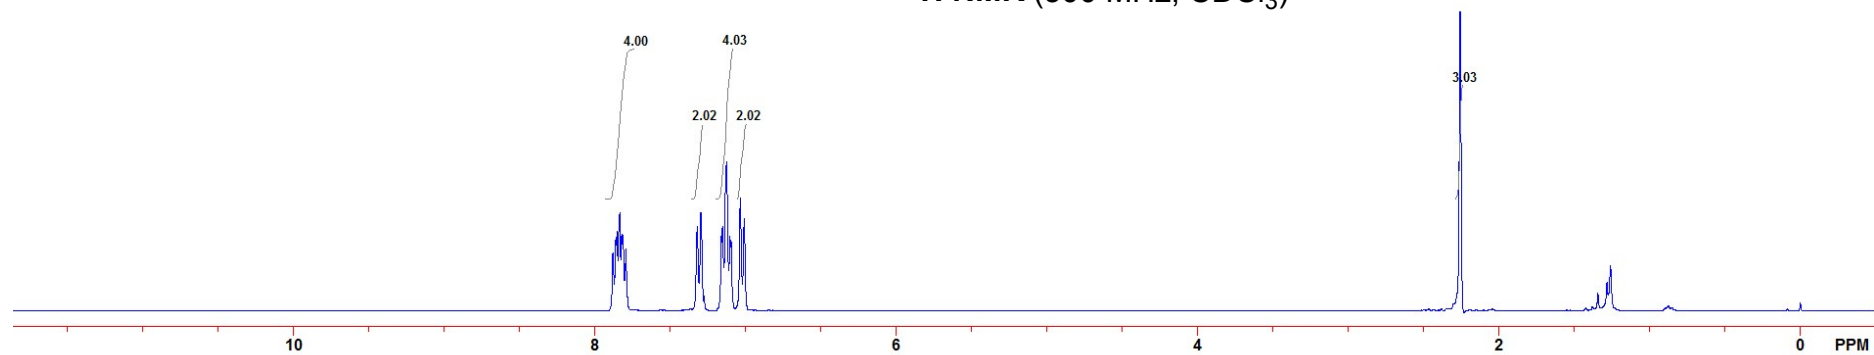

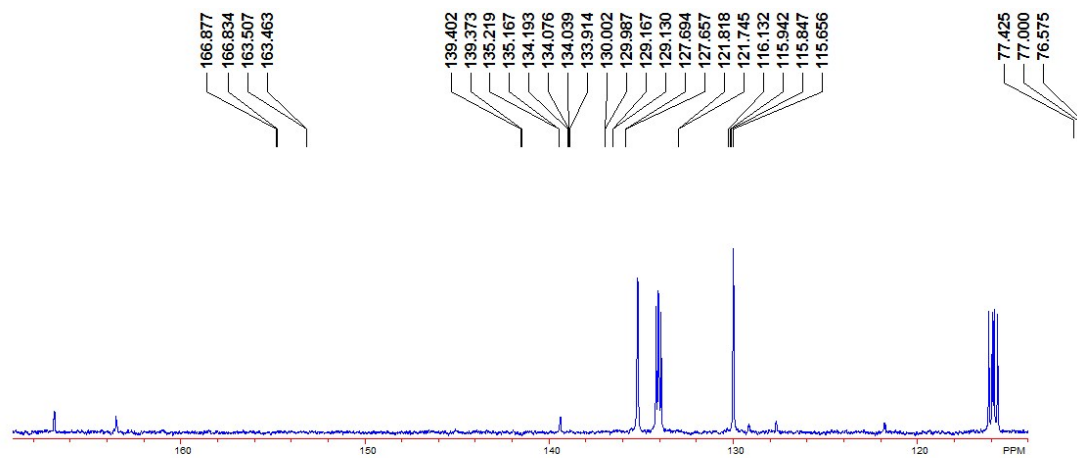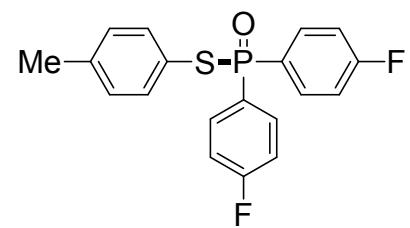

**3af**

<sup>13</sup>C NMR (75 MHz, CDCl<sub>3</sub>)

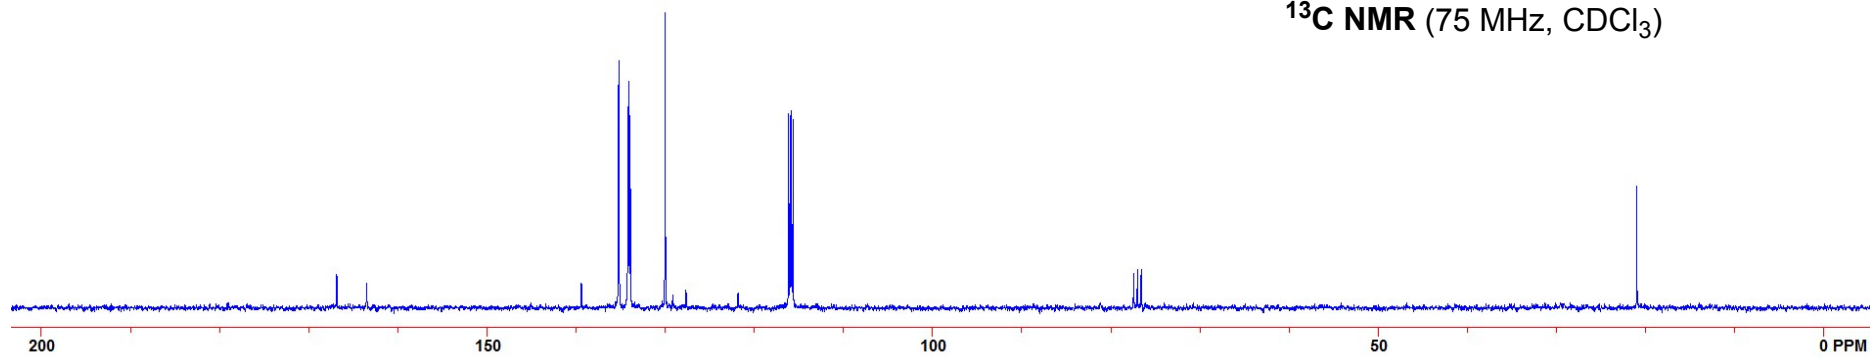

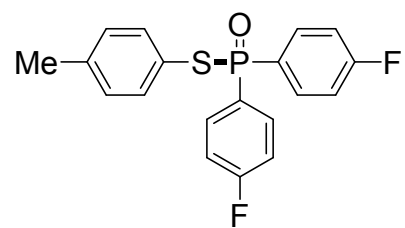

**3af**

**$^{31}\text{P}$  NMR (121.5 MHz,  $\text{CDCl}_3$ )**

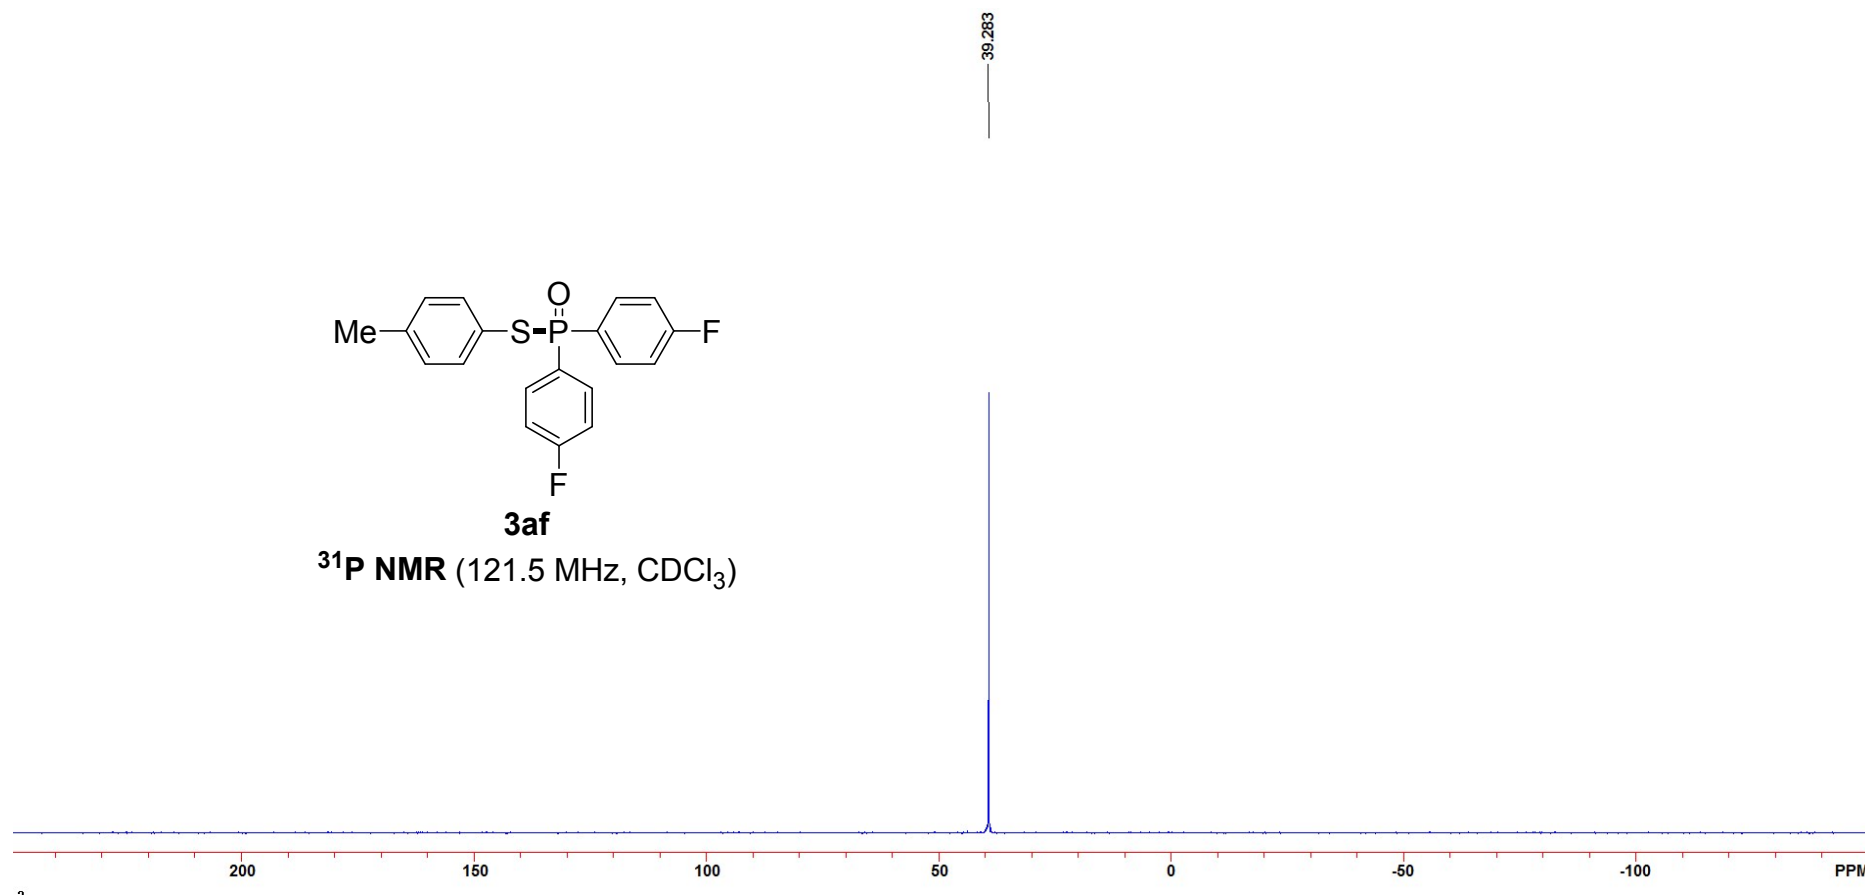

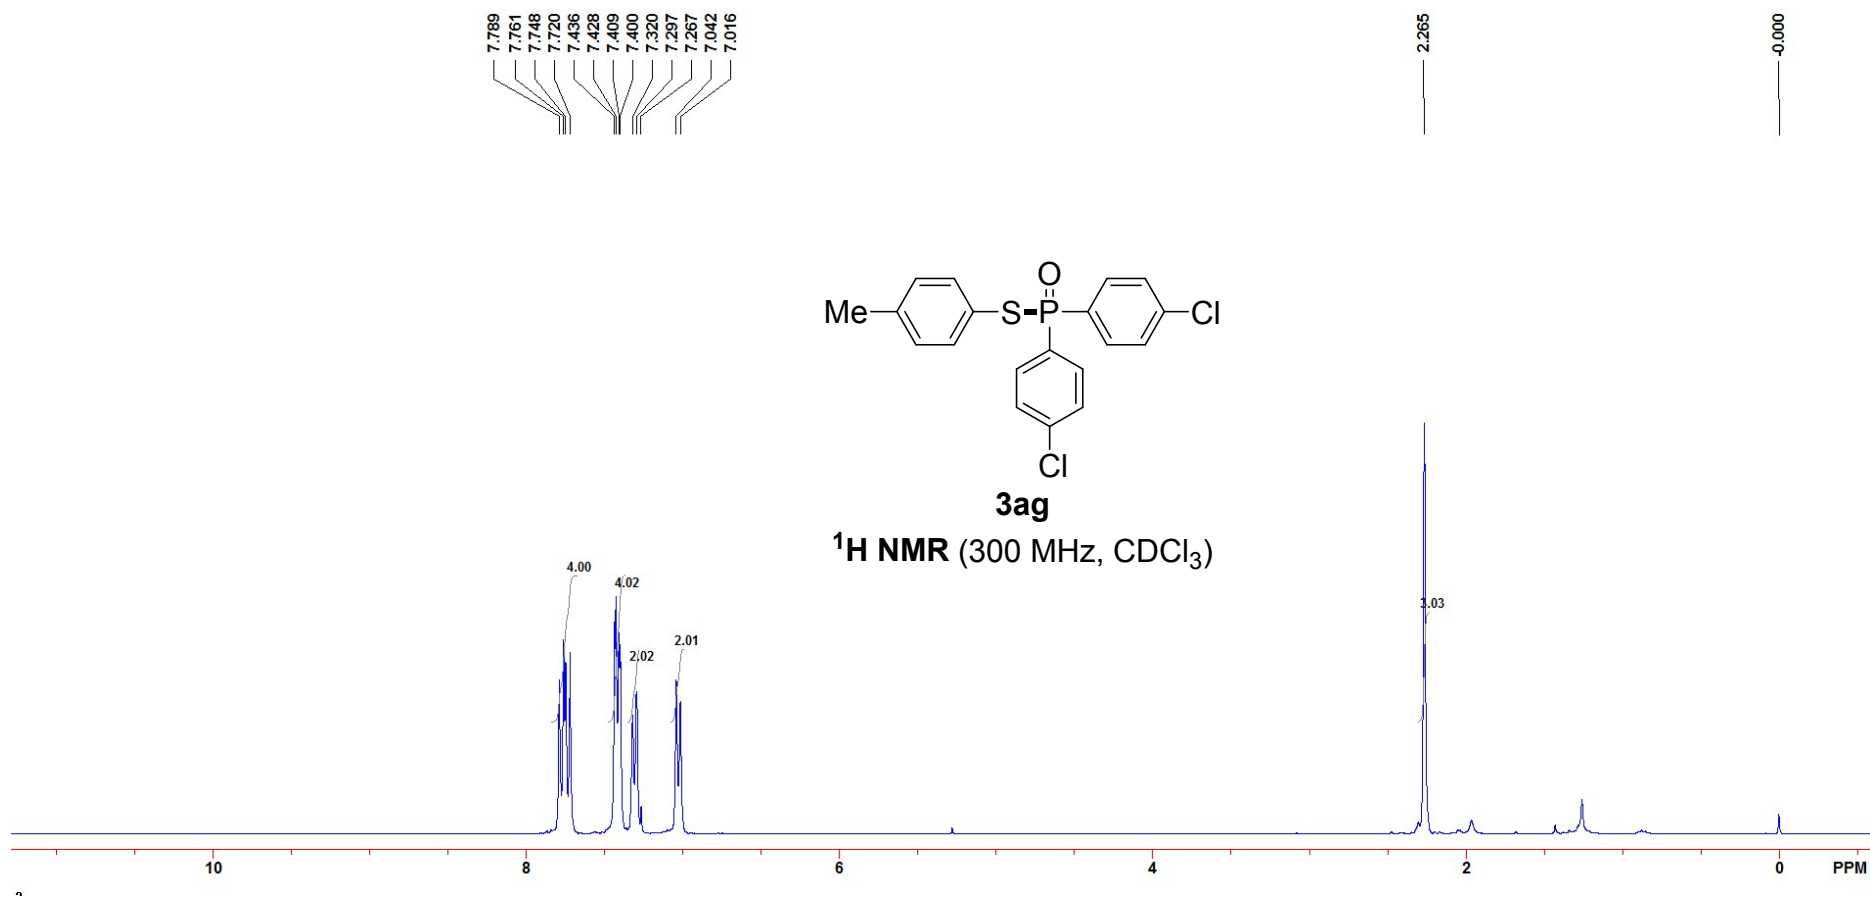

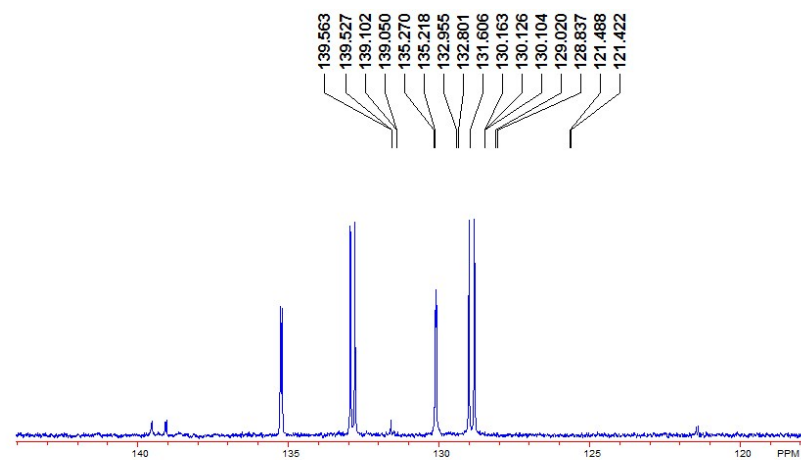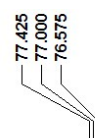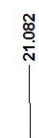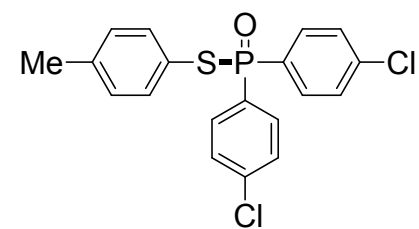

**3ag**

$^{13}\text{C}$  NMR (75 MHz,  $\text{CDCl}_3$ )

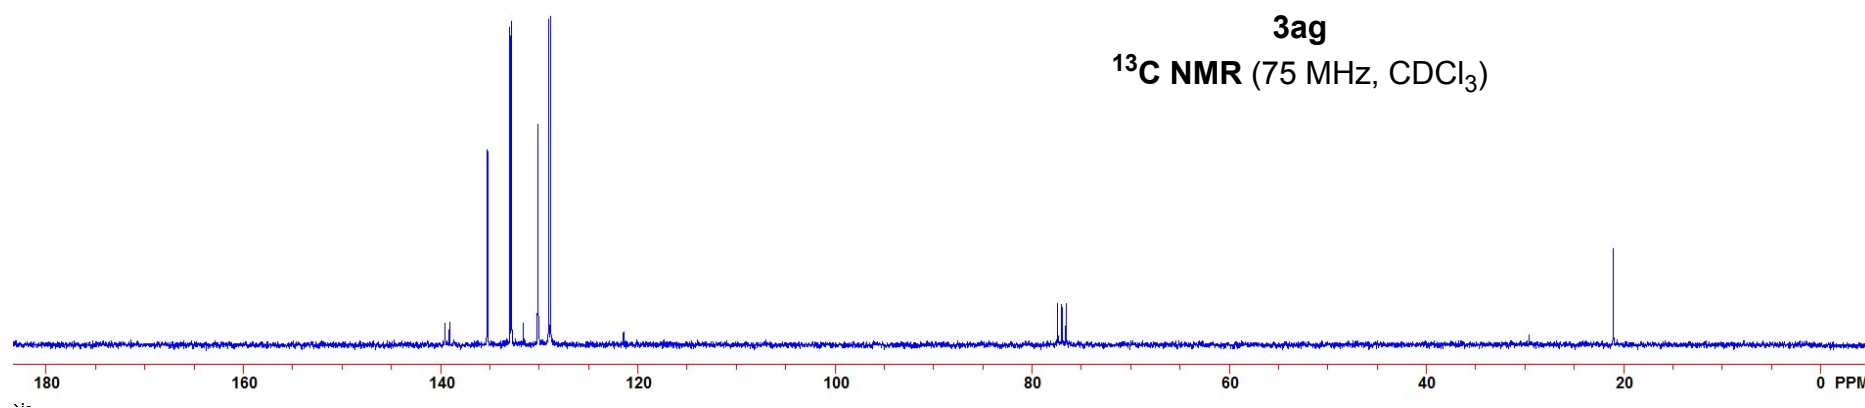



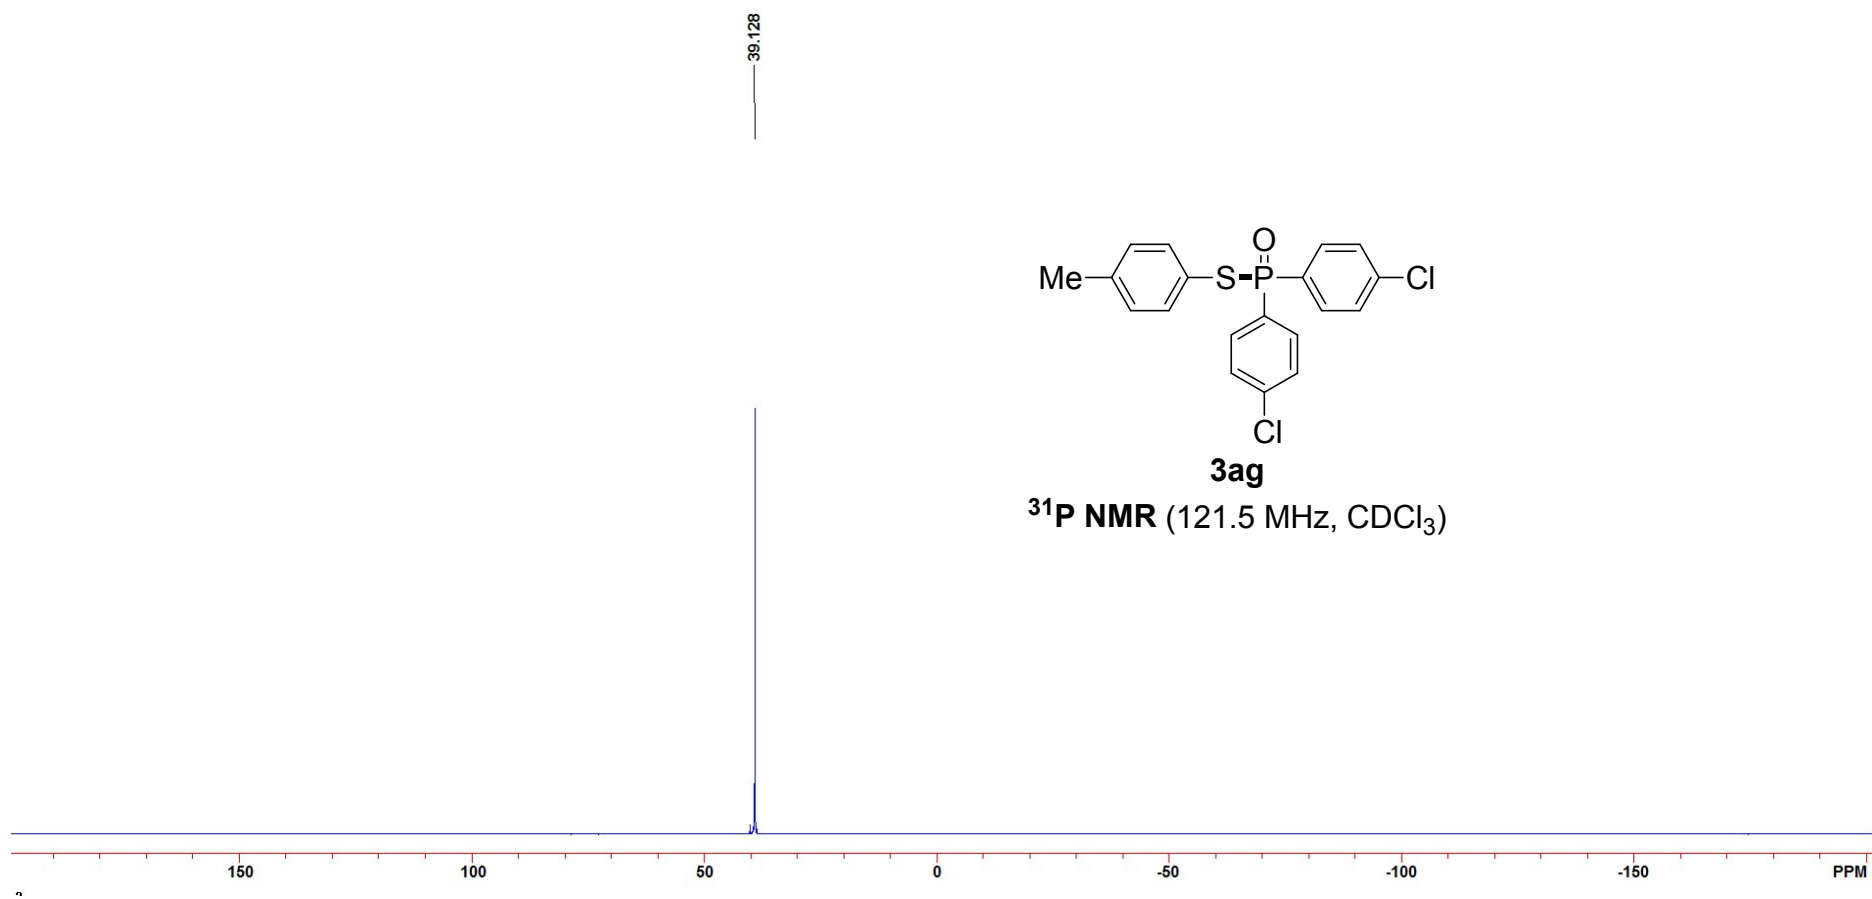

7.713  
7.685  
7.673  
7.644  
7.593  
7.583  
7.565  
7.555  
7.323  
7.320  
7.297  
7.271  
7.040  
7.014

2.261

0.000

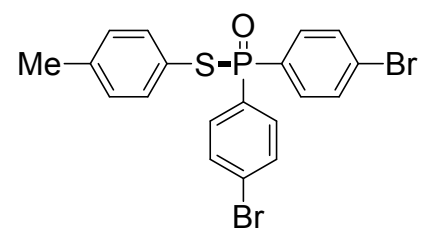

**3ah**

<sup>1</sup>H NMR (300 MHz, CDCl<sub>3</sub>)

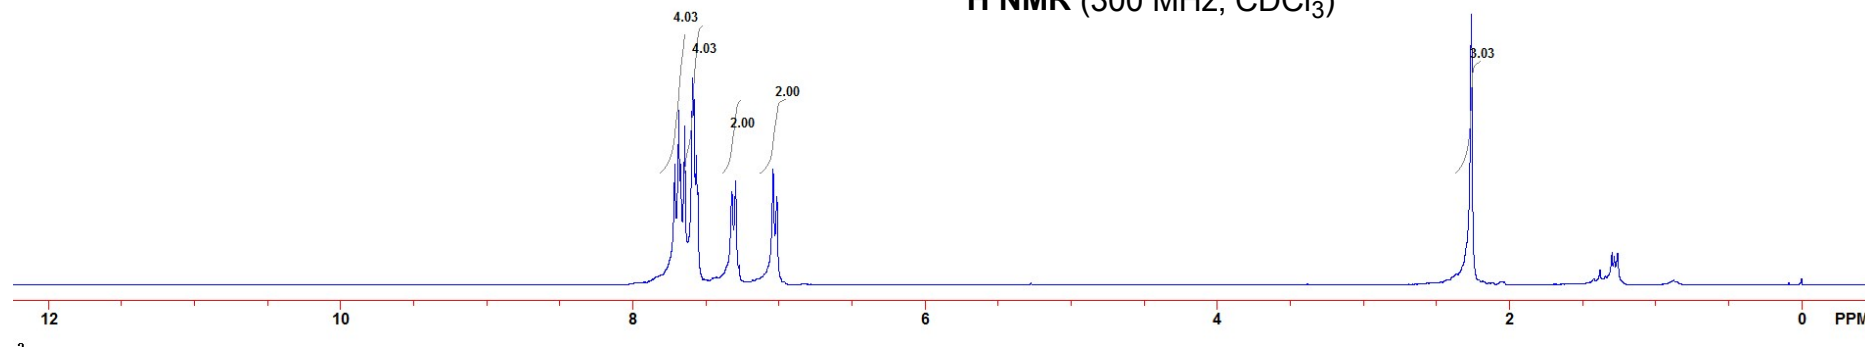

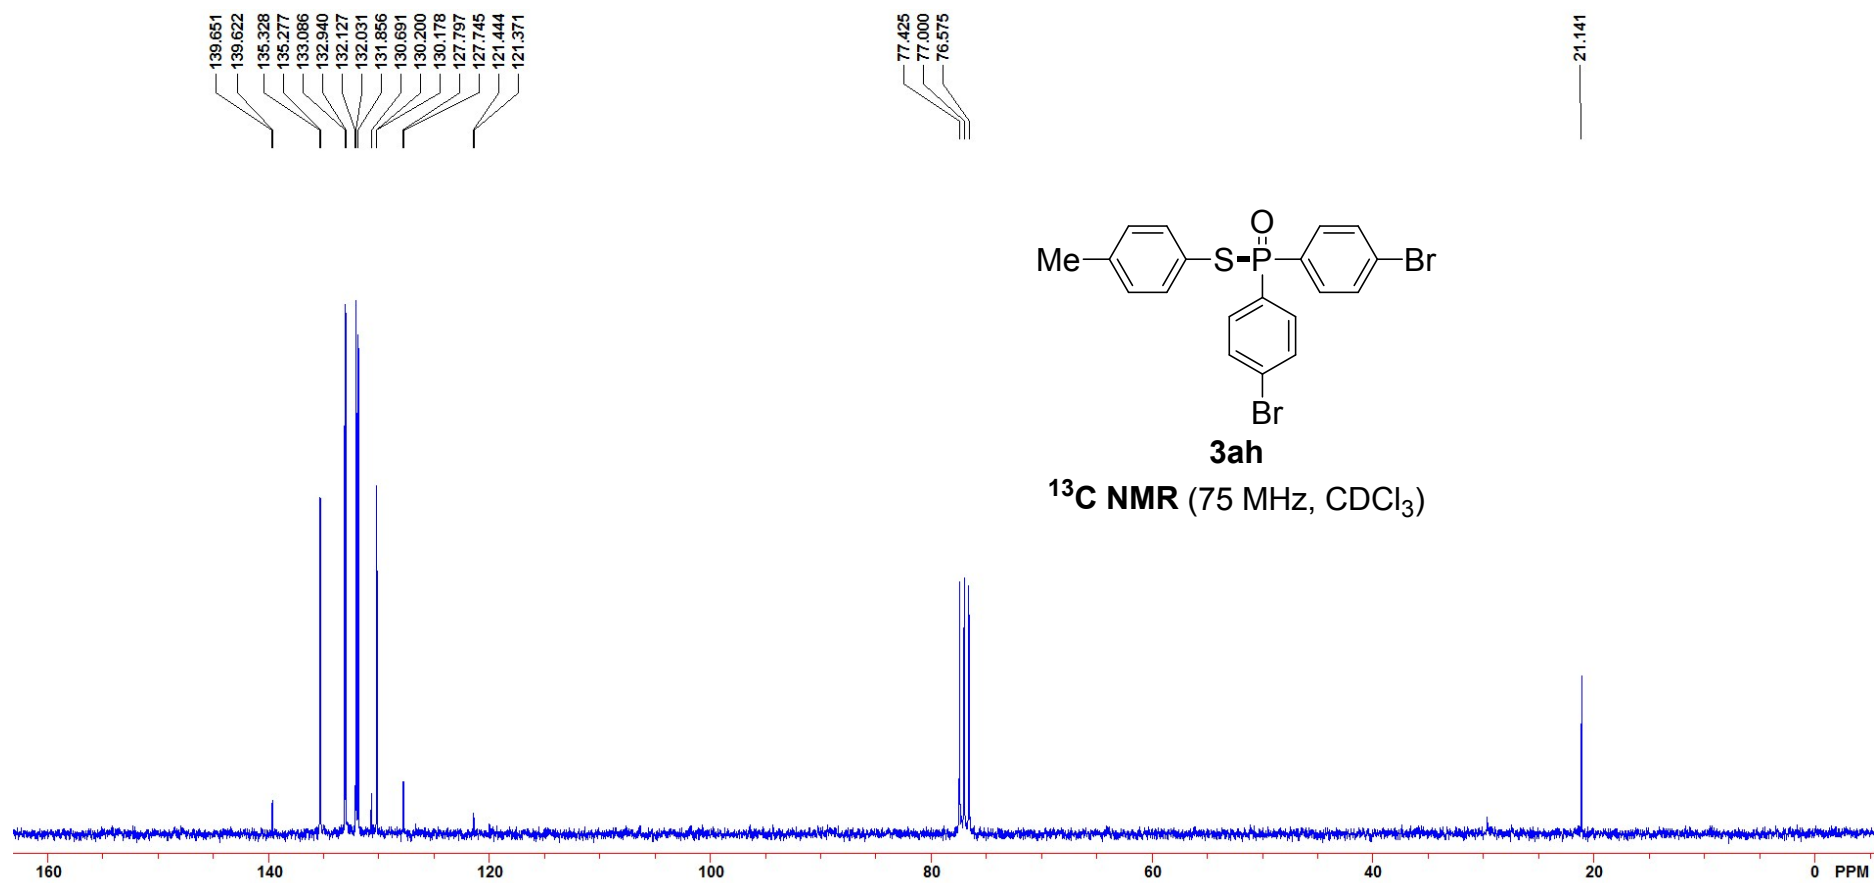

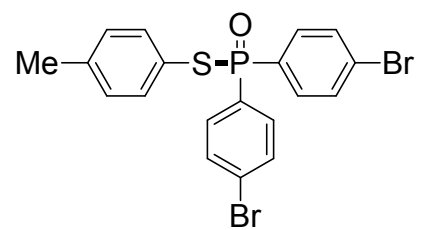

**3ah**

**$^{31}\text{P}$  NMR (121.5 MHz,  $\text{CDCl}_3$ )**

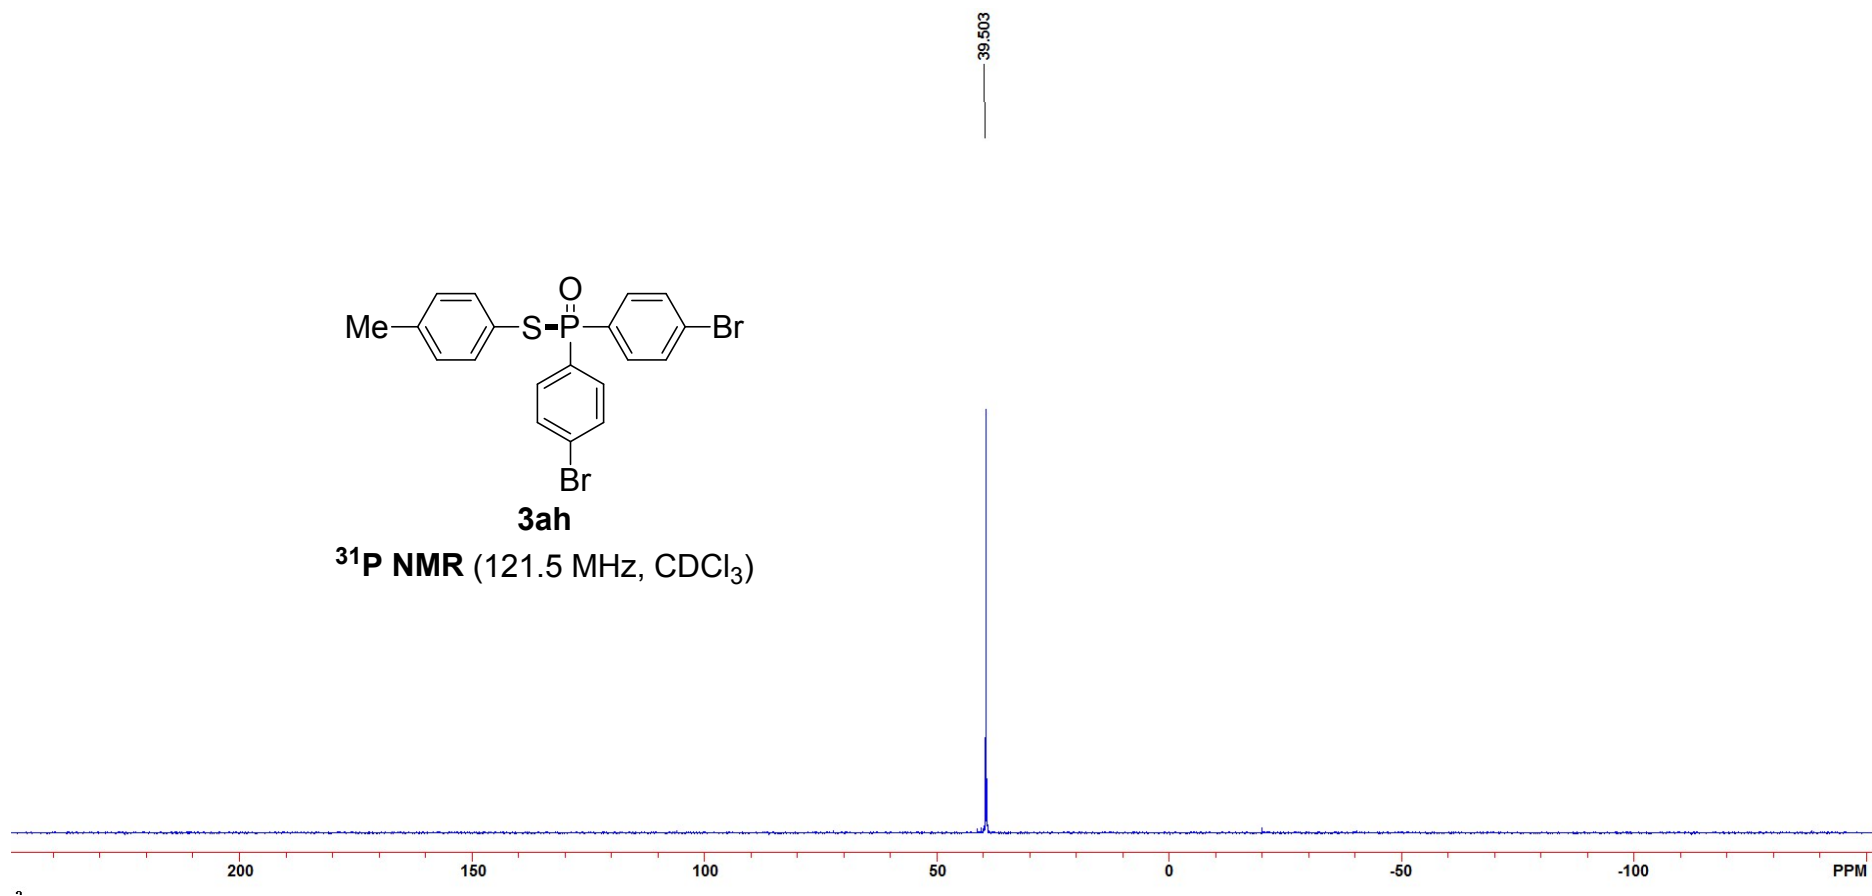

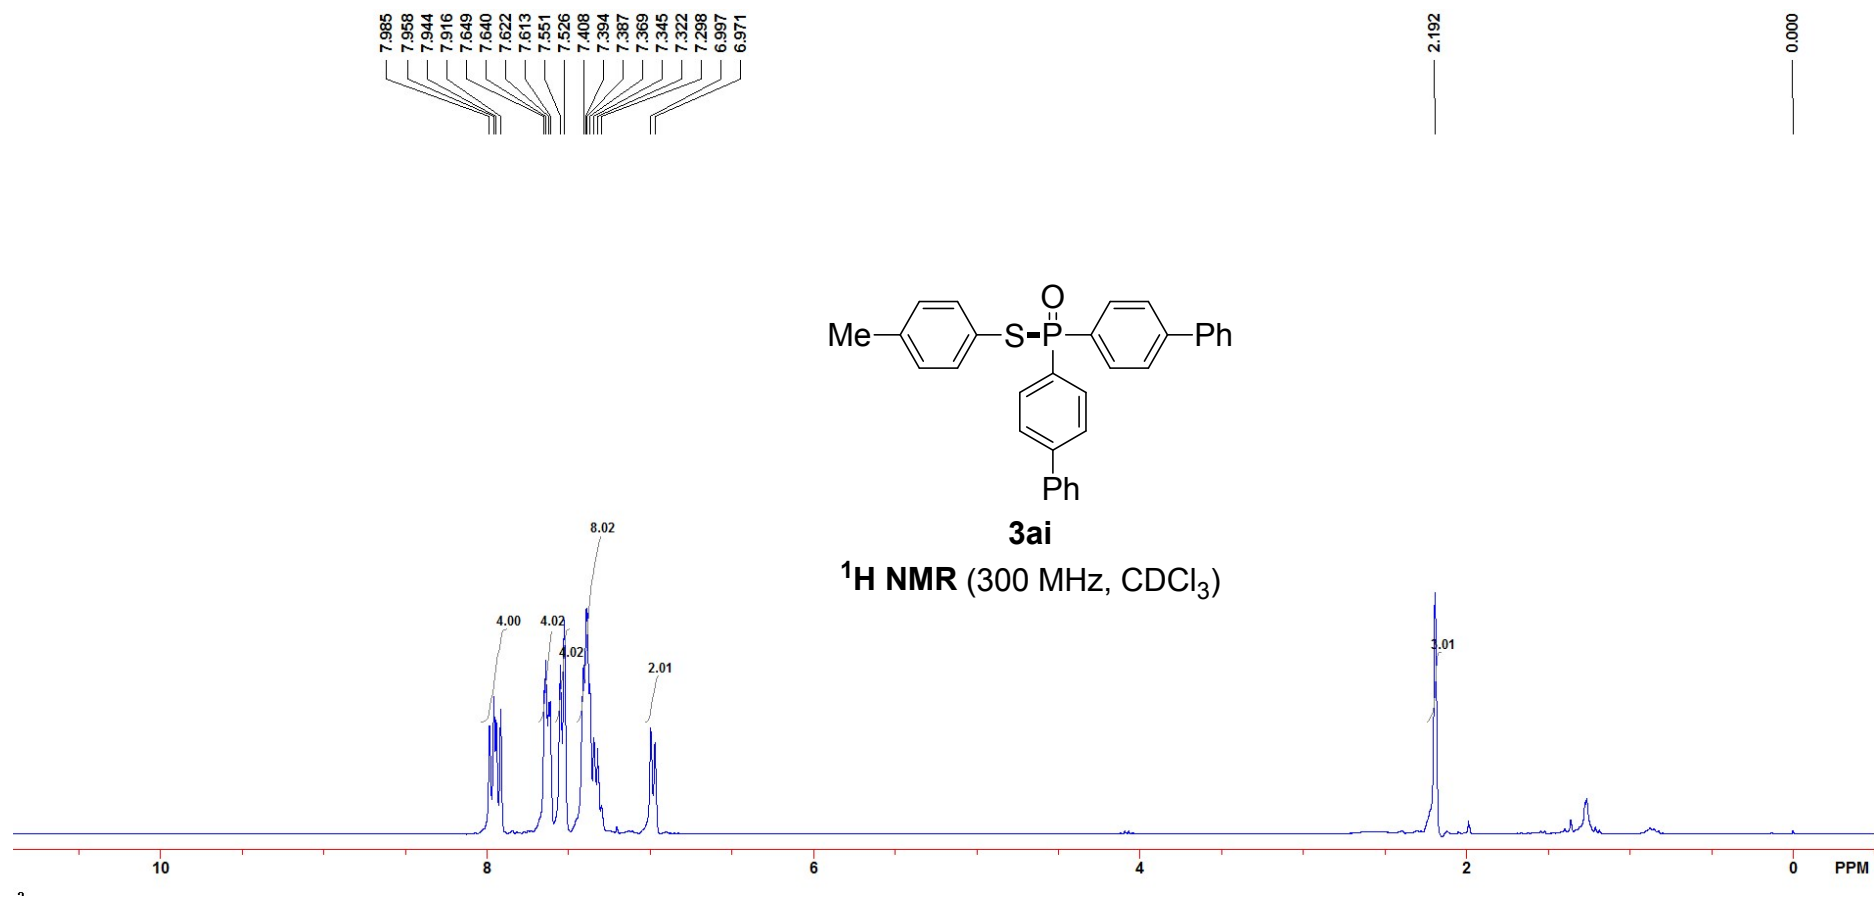

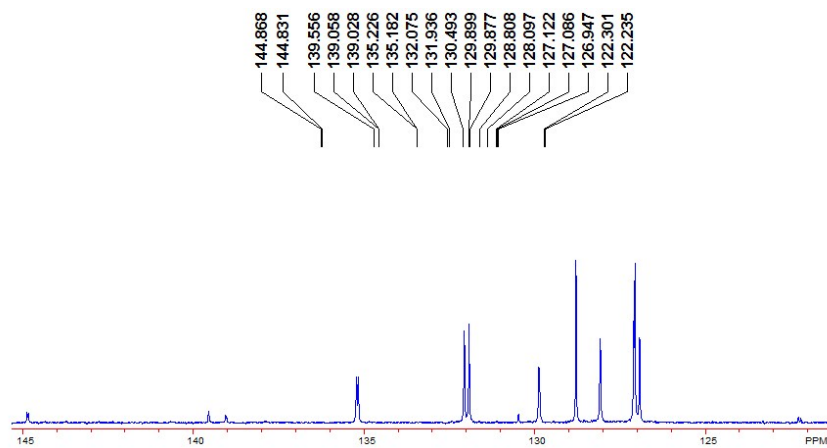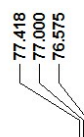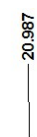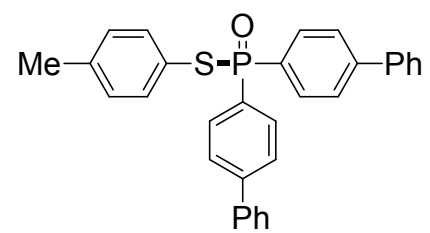

**3ai**

**$^{13}\text{C}$  NMR (75 MHz,  $\text{CDCl}_3$ )**

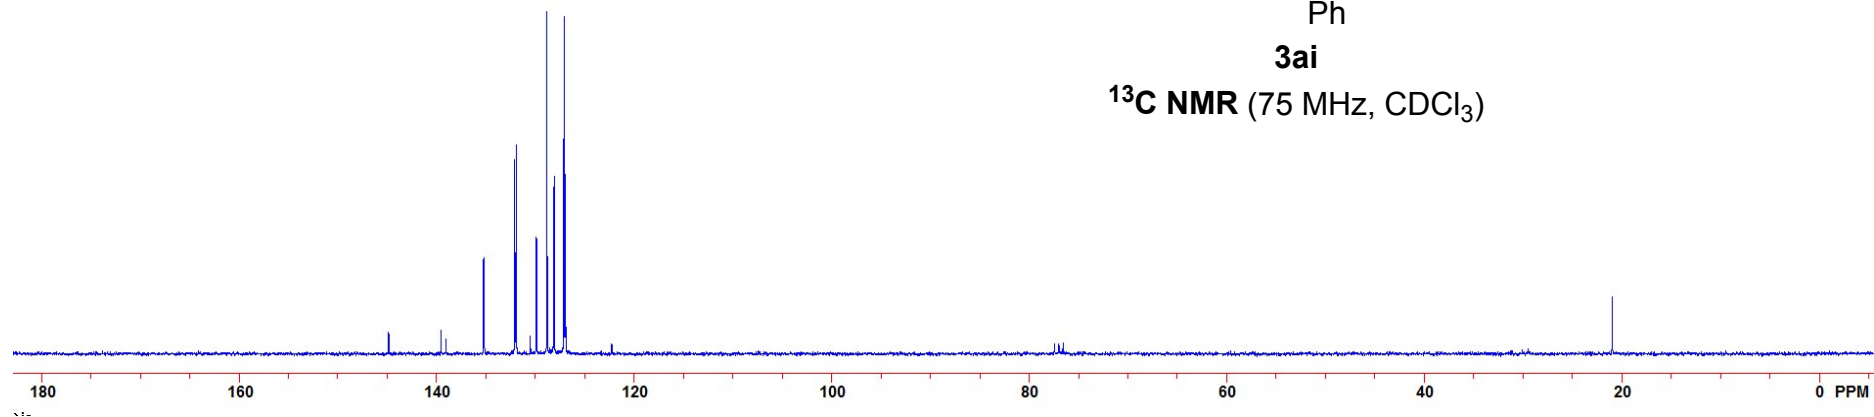

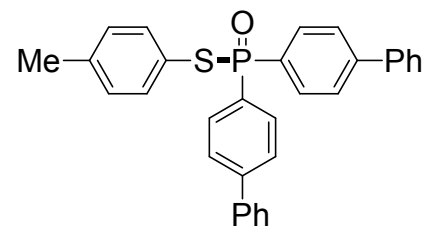

**3ai**

**$^{31}\text{P}$  NMR** (121.5 MHz,  $\text{CDCl}_3$ )

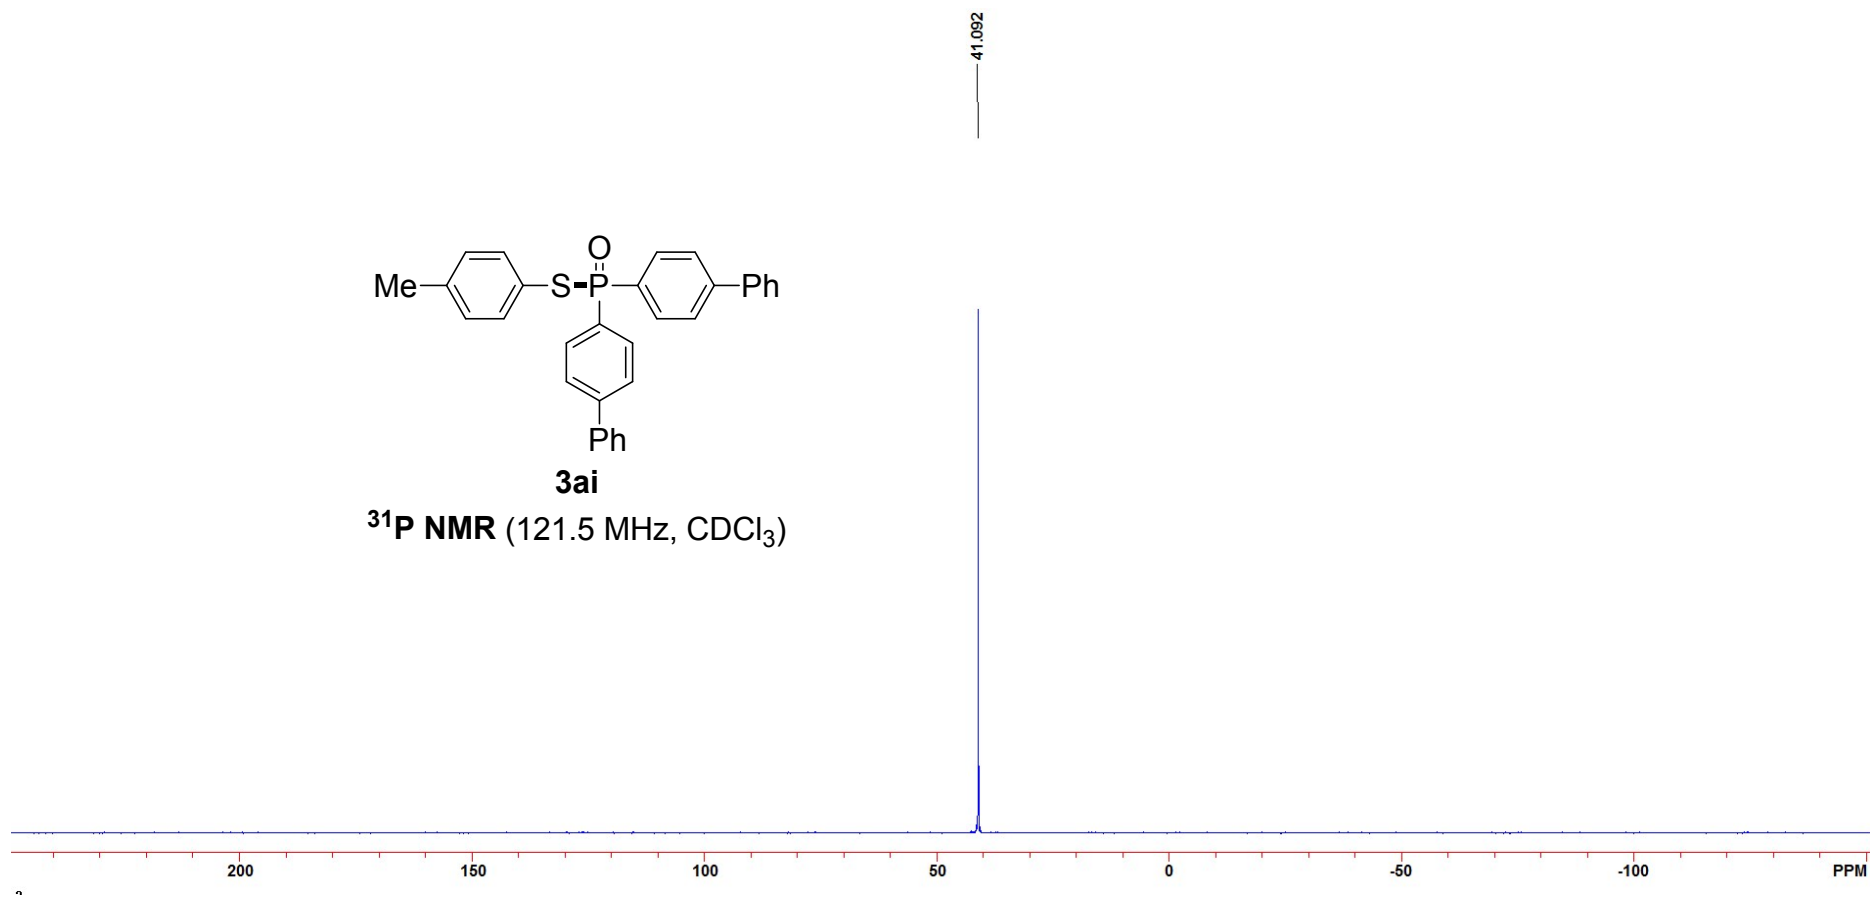

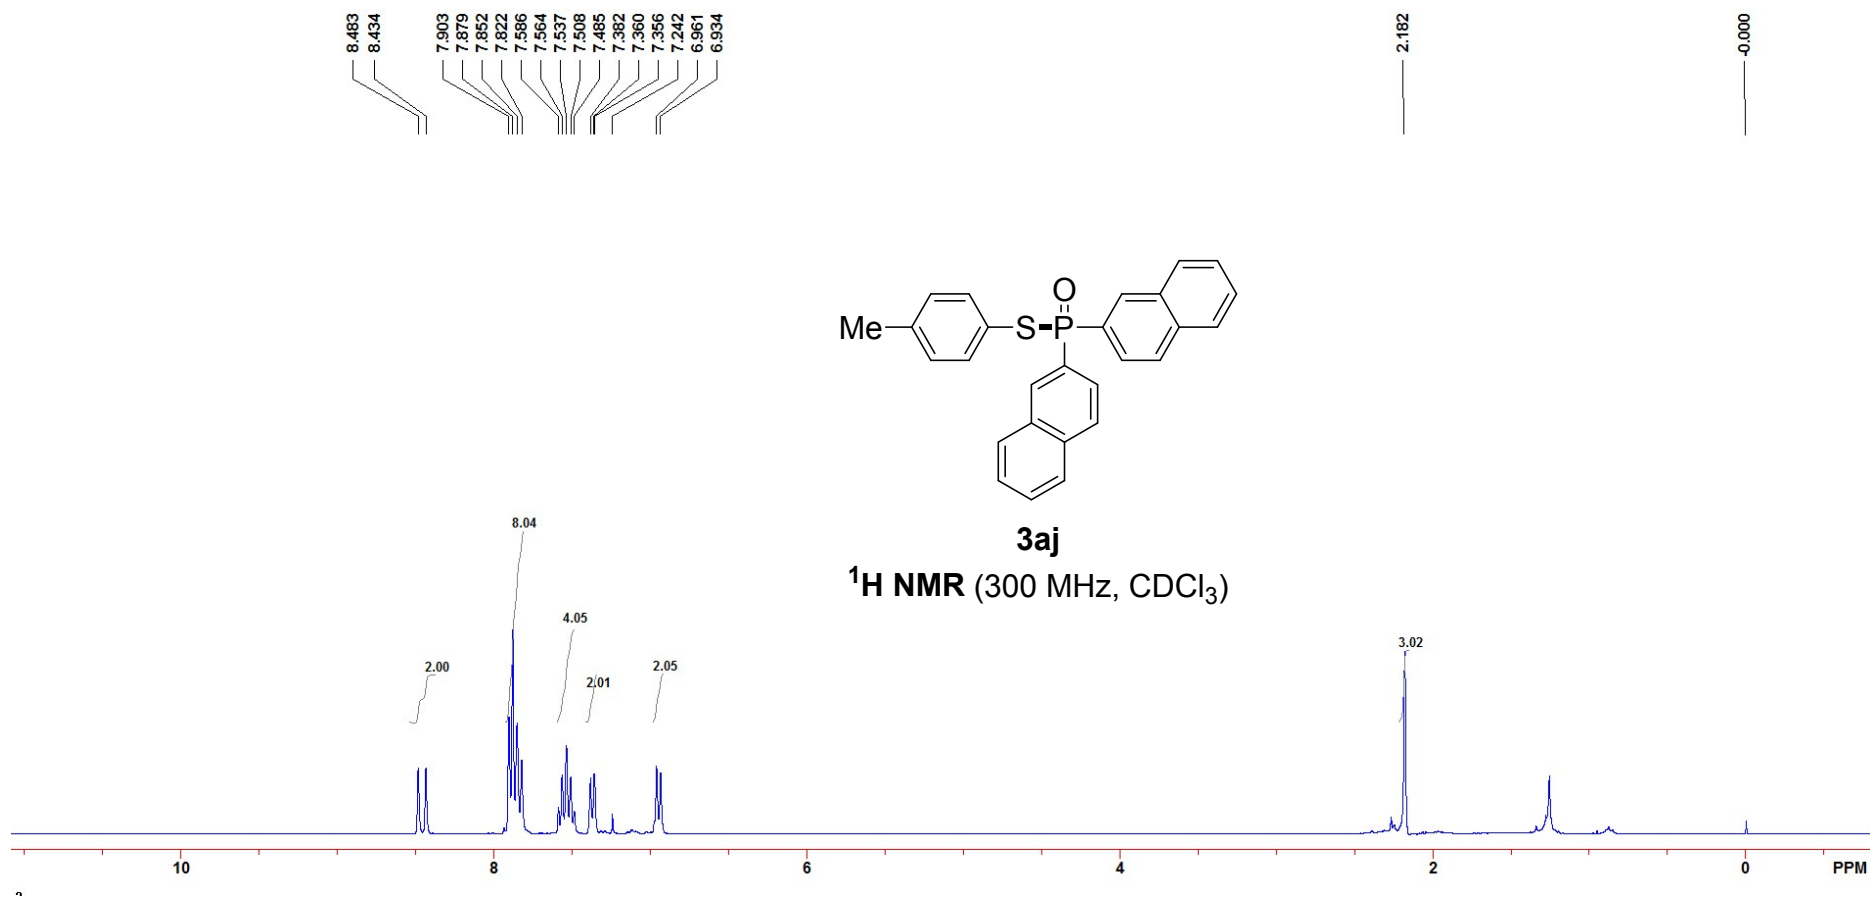



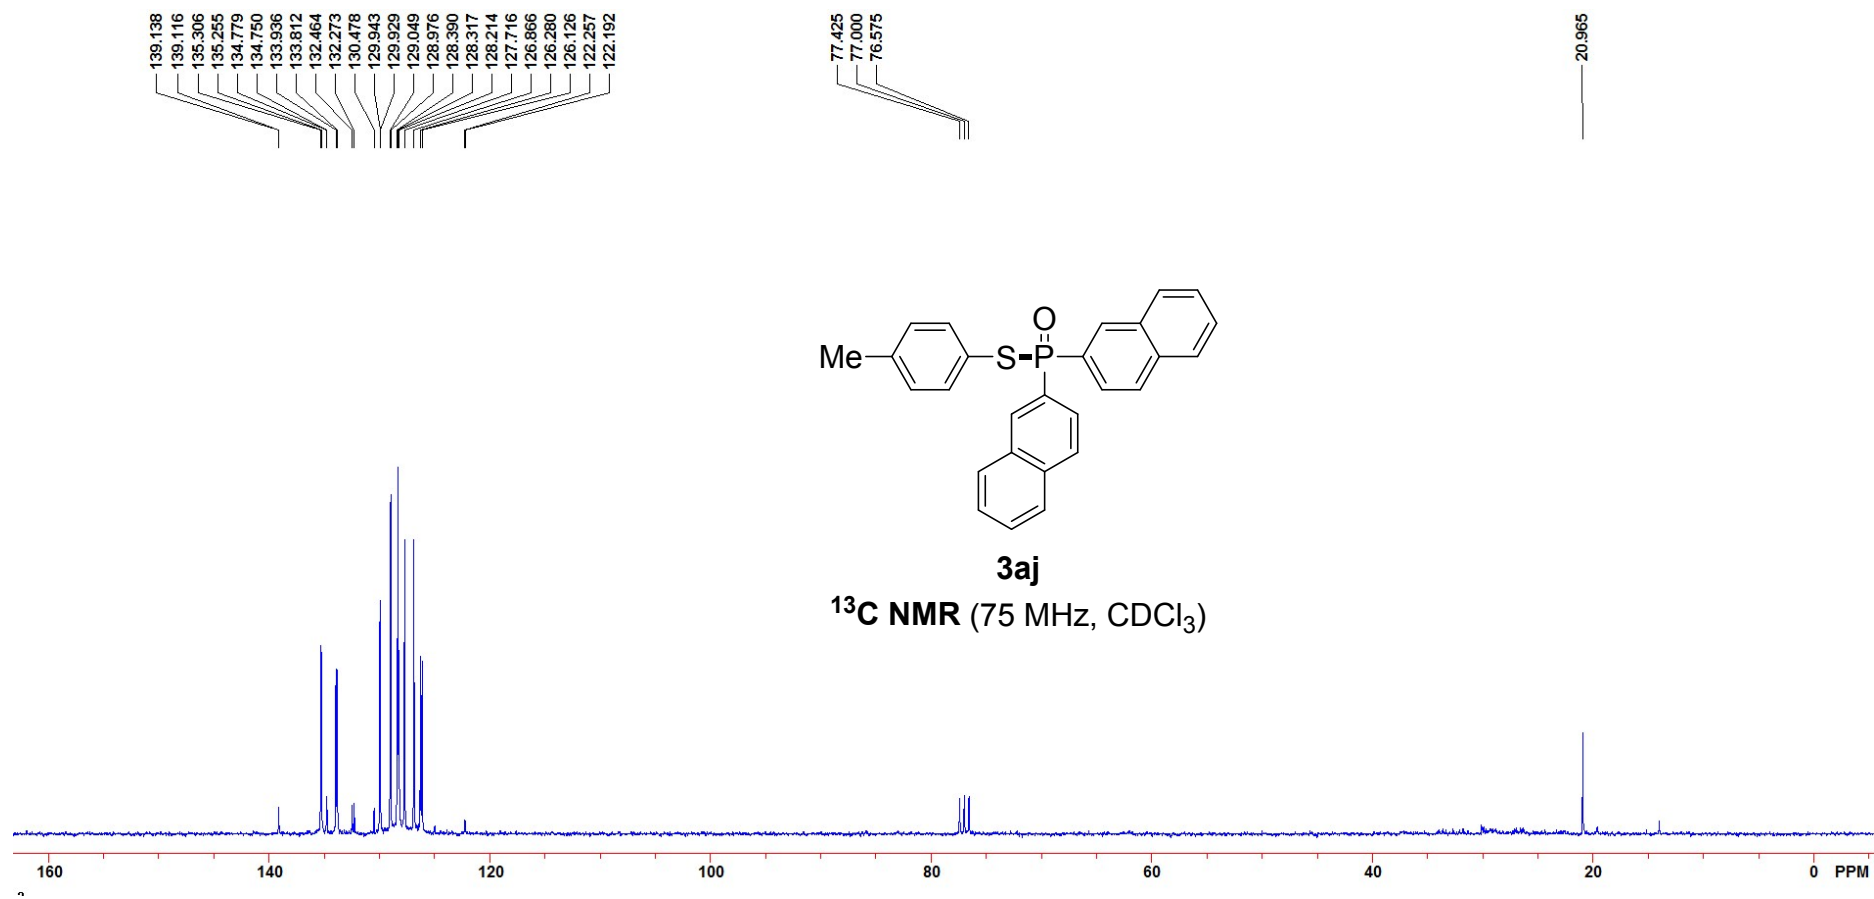

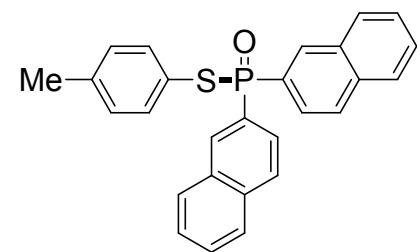

**3aj**

**$^{31}\text{P}$  NMR (121.5 MHz,  $\text{CDCl}_3$ )**

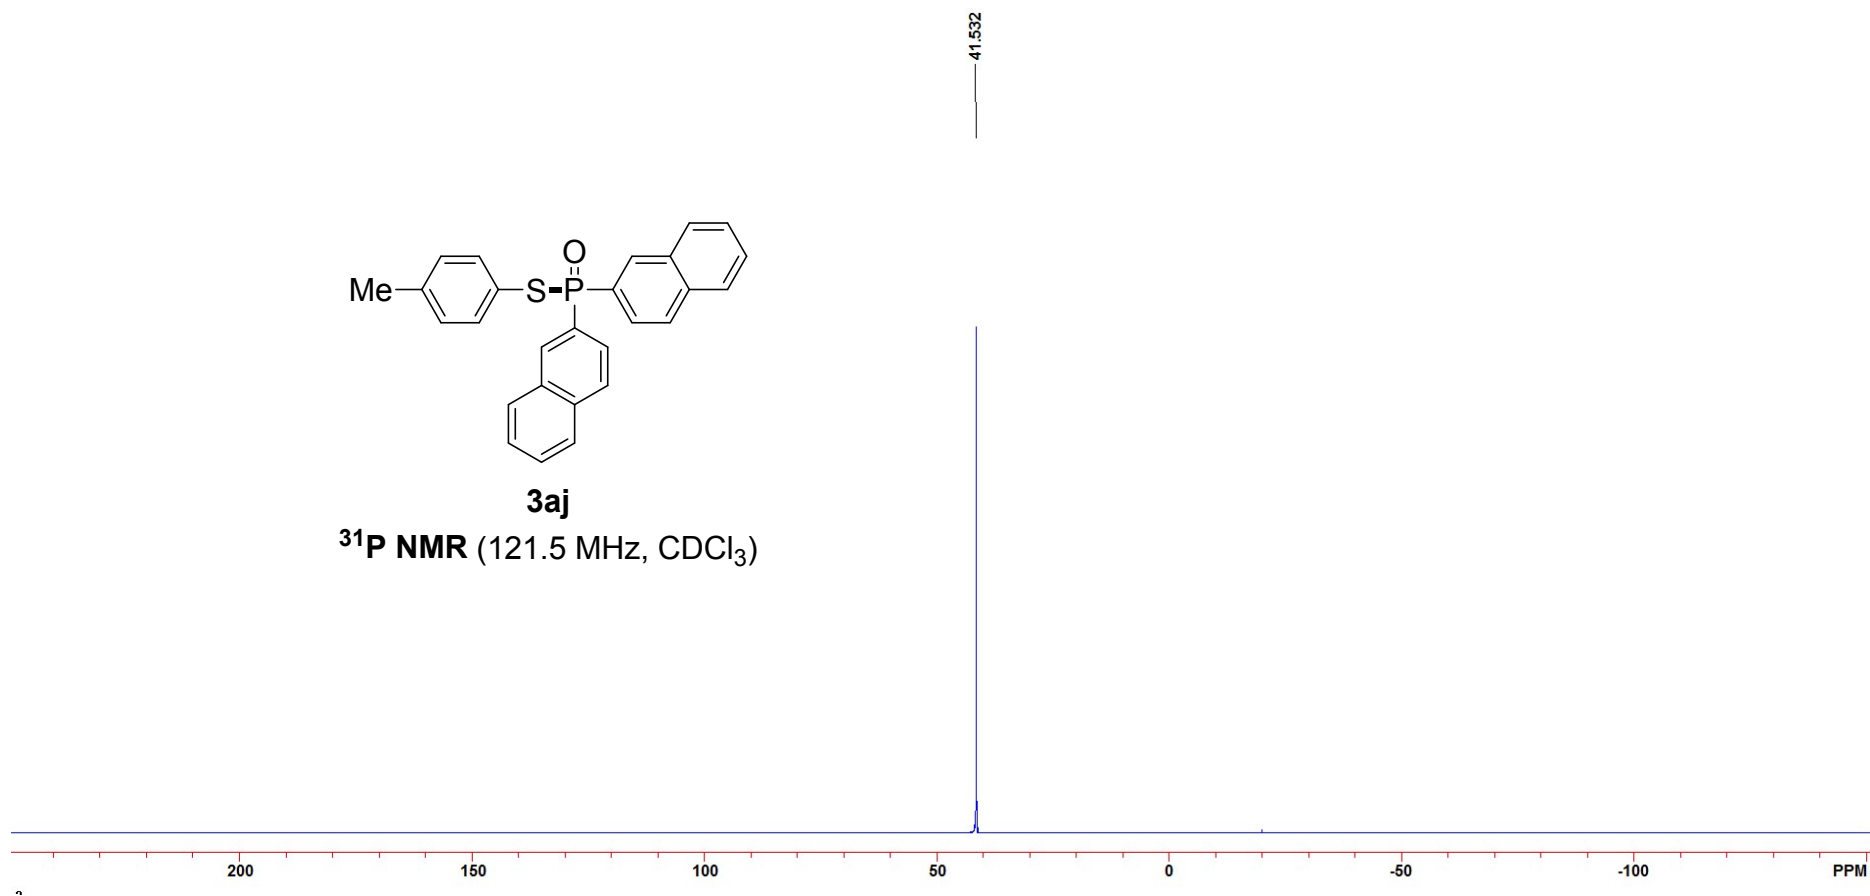

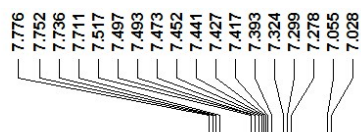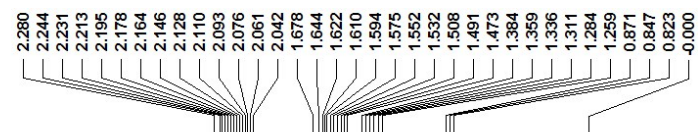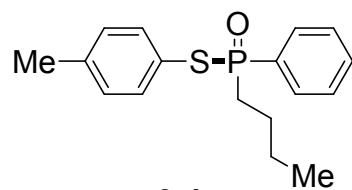

**3ak**

<sup>1</sup>H NMR (300 MHz, CDCl<sub>3</sub>)

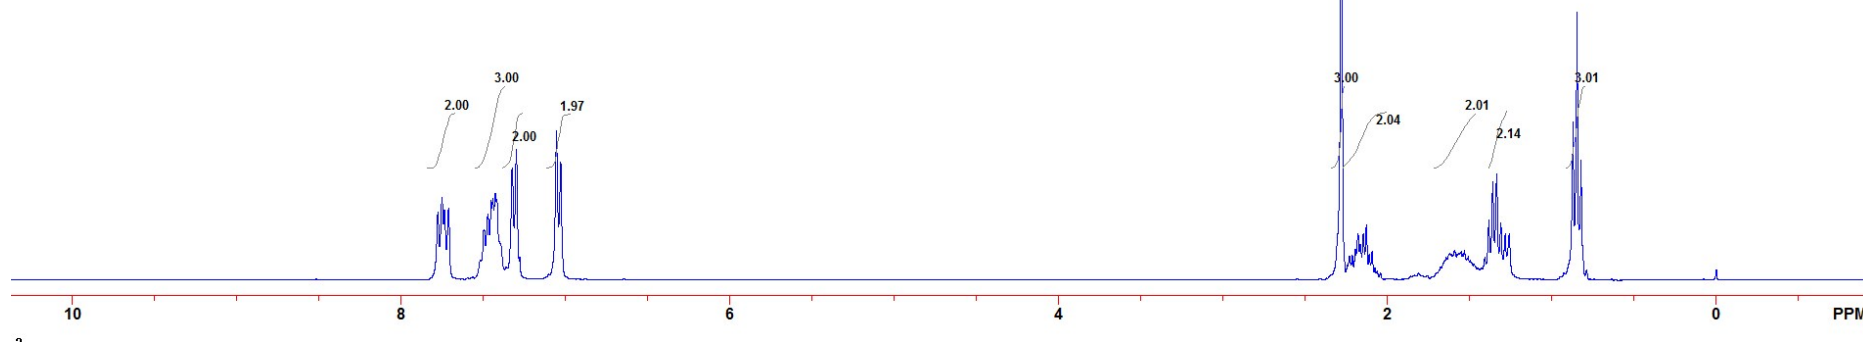

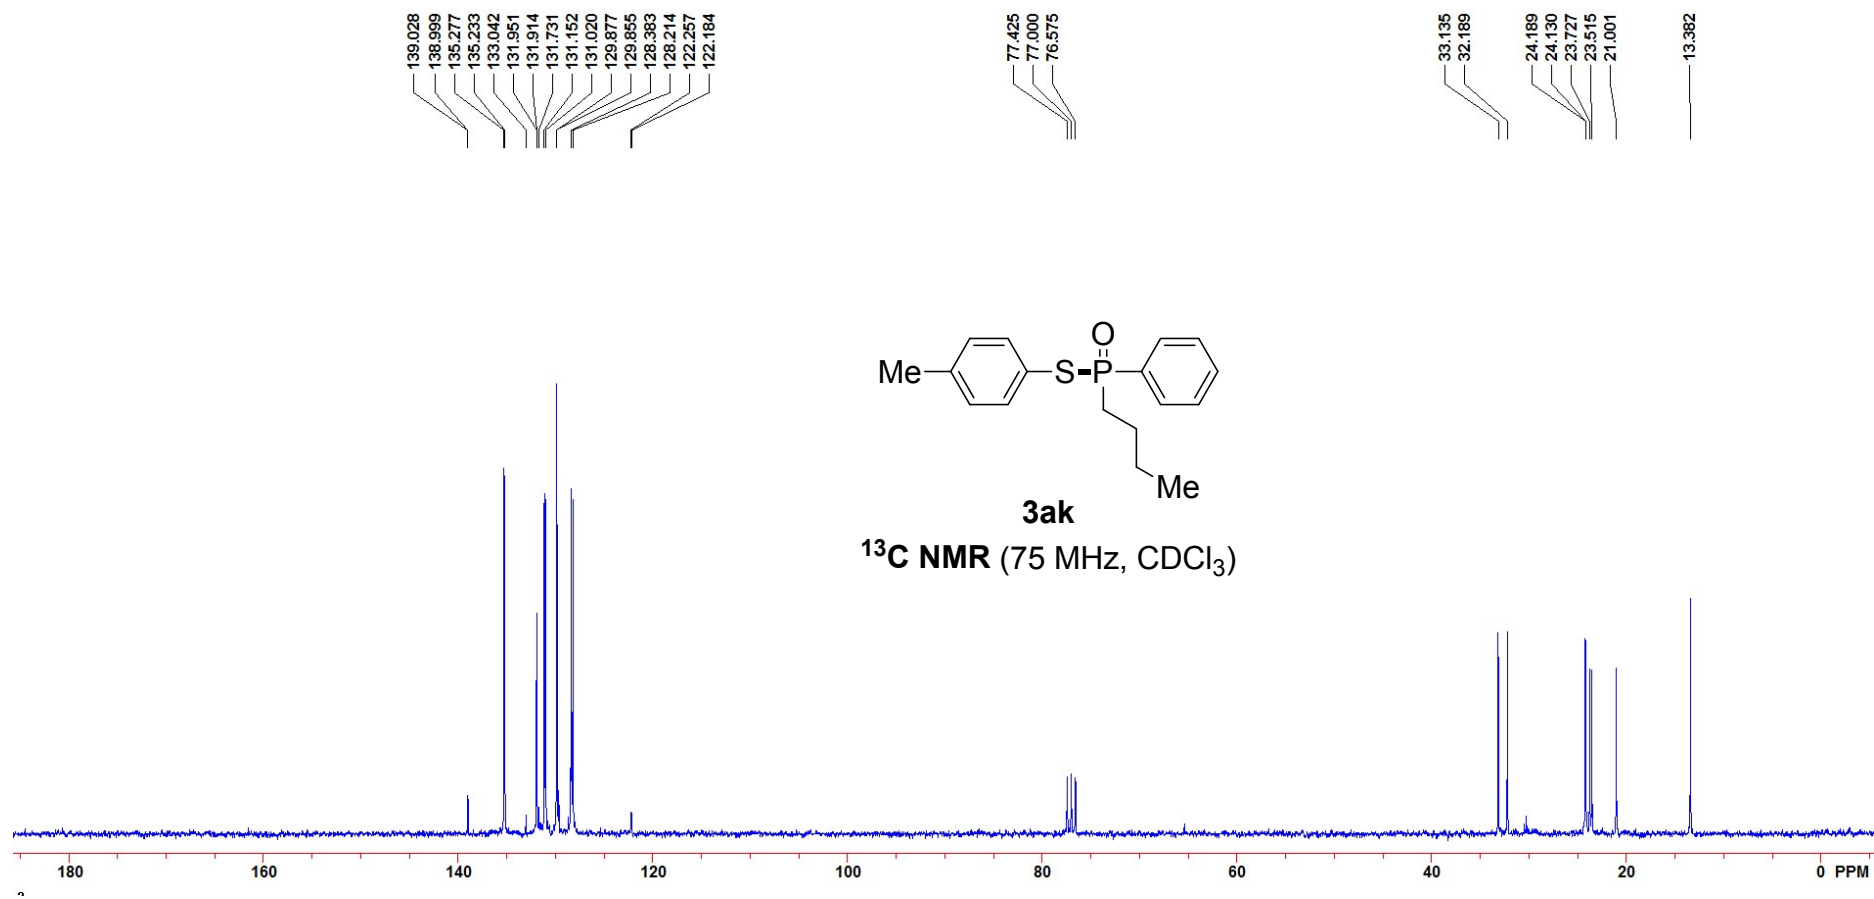

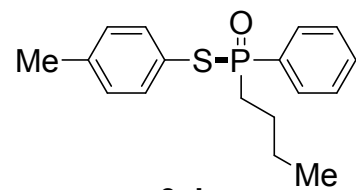

**3ak**

**$^{31}\text{P}$  NMR (121.5 MHz,  $\text{CDCl}_3$ )**

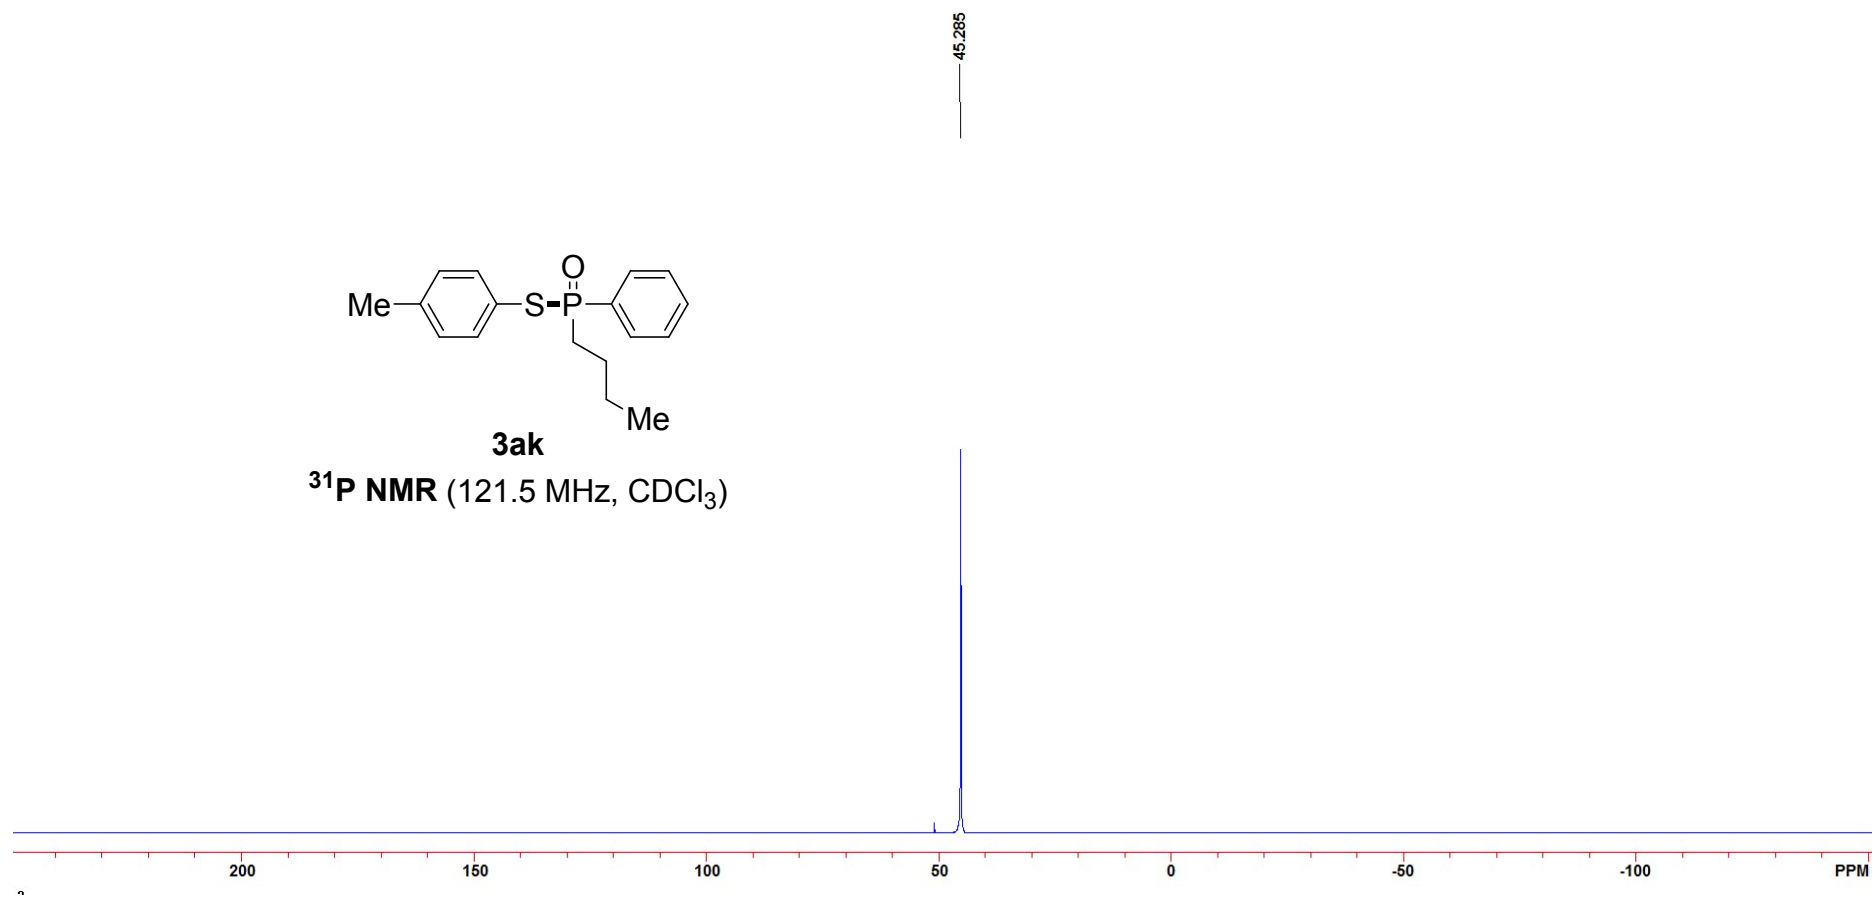

7.659  
7.632  
7.624  
7.597  
7.410  
7.388  
7.327  
7.154  
7.072  
7.023  
6.999

3.555  
3.506

2.235

0.000

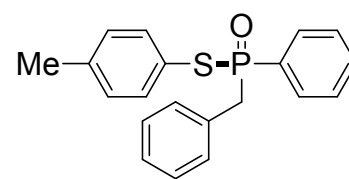

**3al**

<sup>1</sup>H NMR (300 MHz, CDCl<sub>3</sub>)

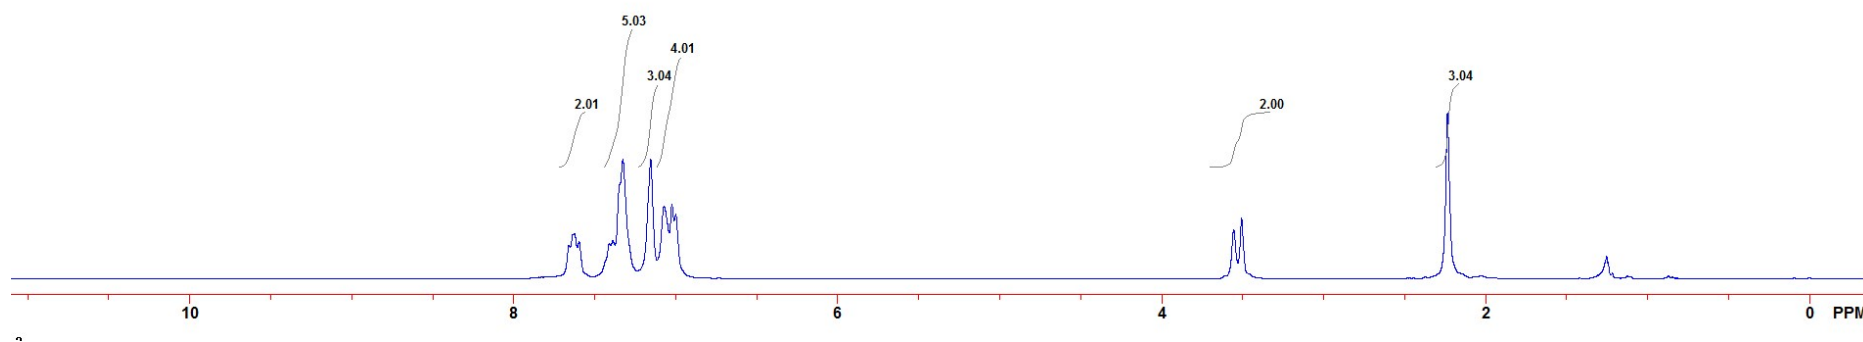

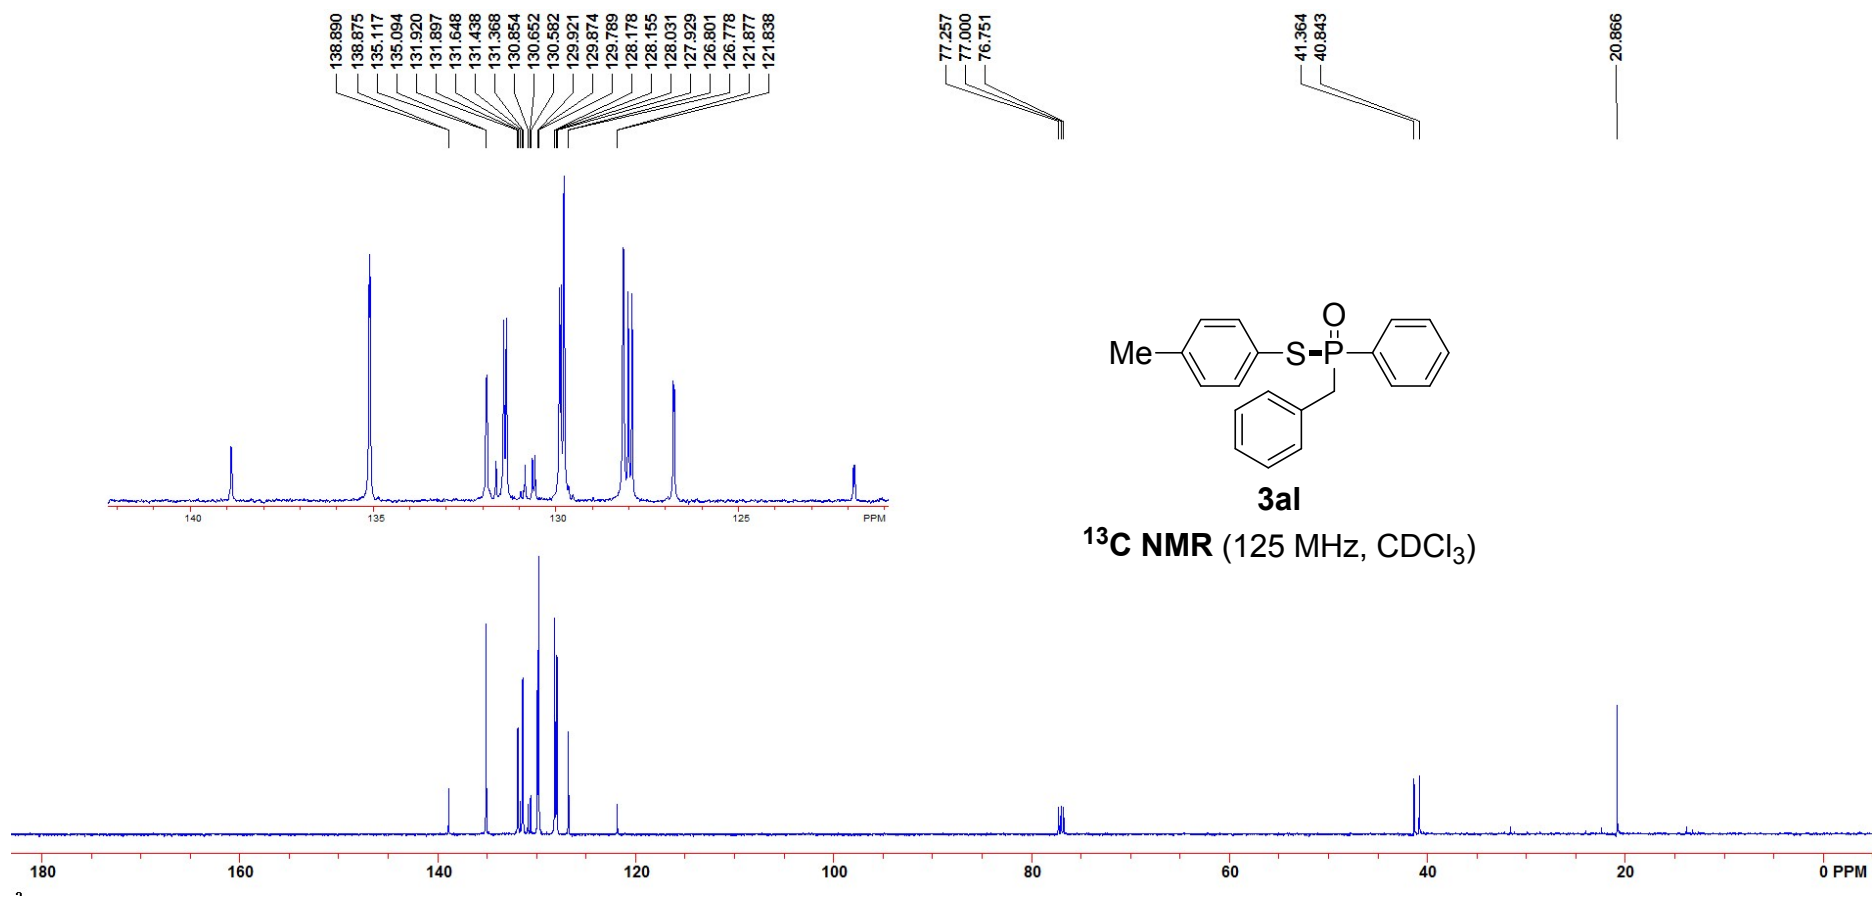

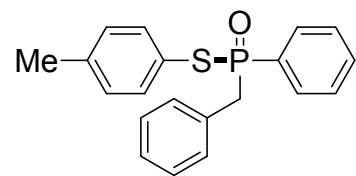

**3al**

<sup>31</sup>P NMR (202.5 MHz, CDCl<sub>3</sub>)

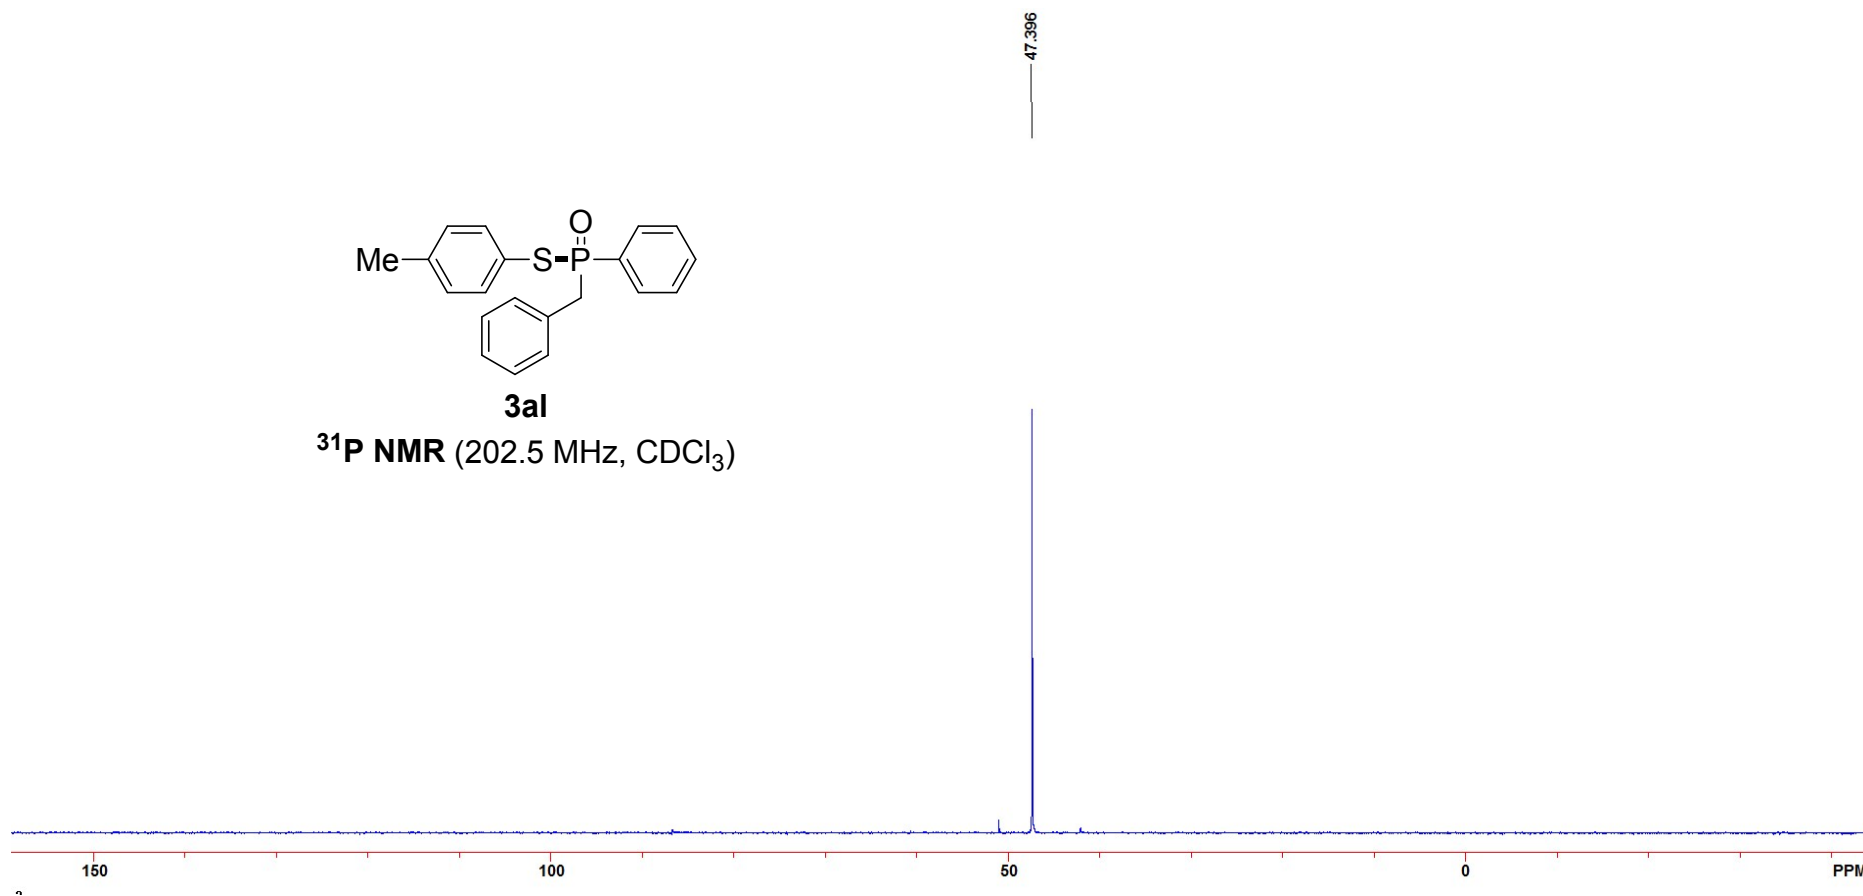



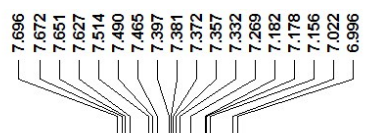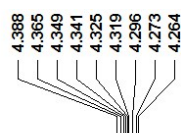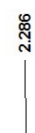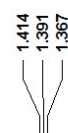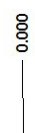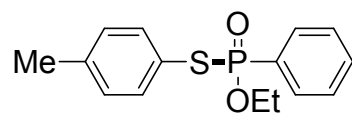

**3am**

**<sup>1</sup>H NMR (300 MHz, CDCl<sub>3</sub>)**

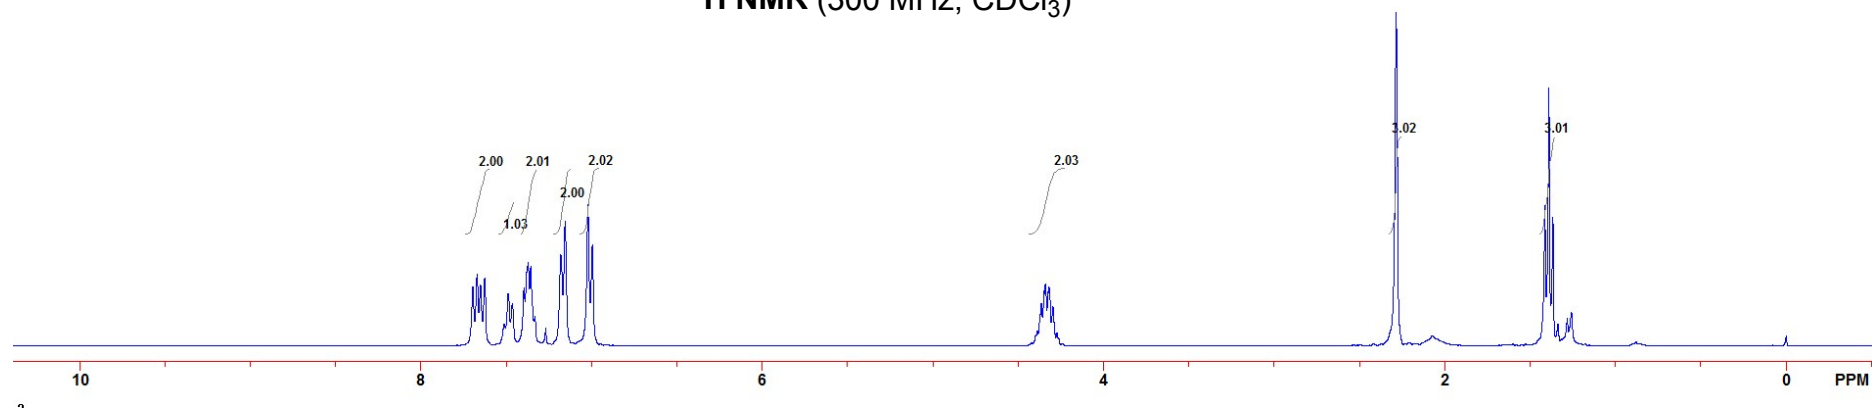

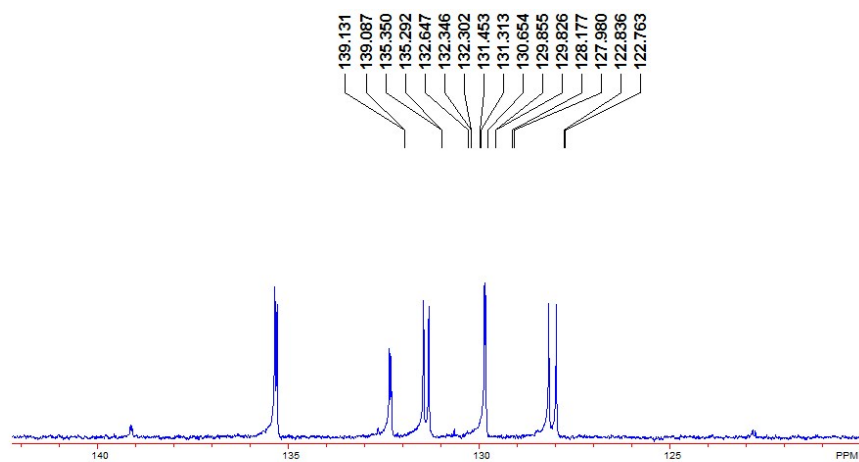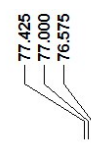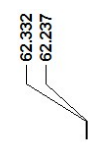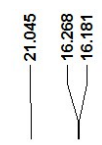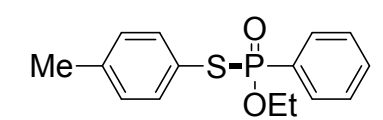

**3am**

<sup>13</sup>C NMR (75 MHz, CDCl<sub>3</sub>)

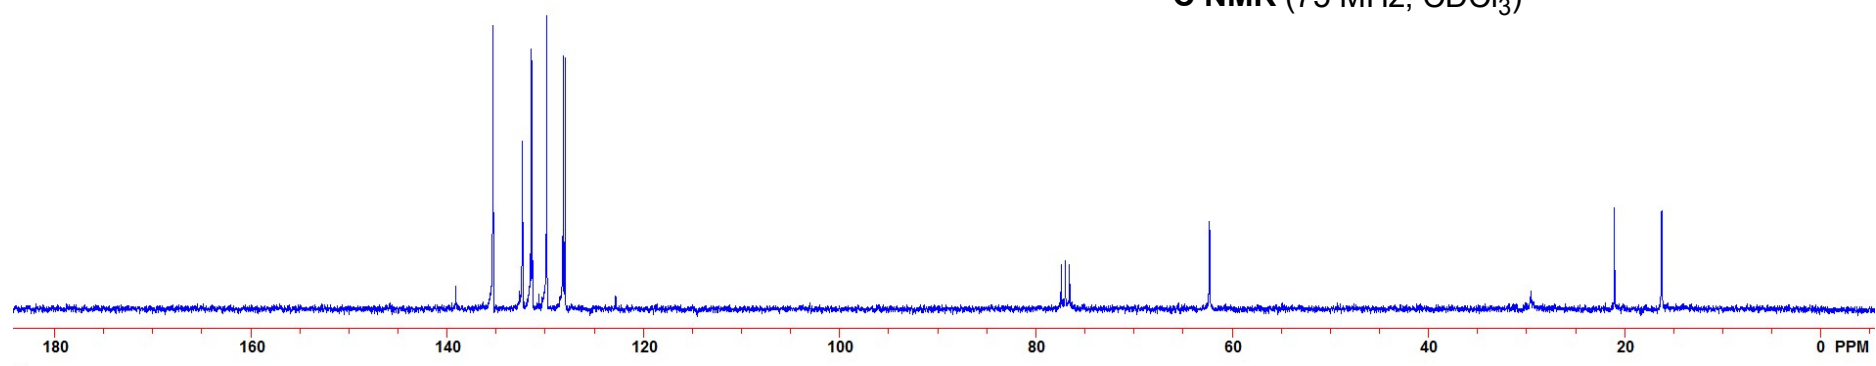

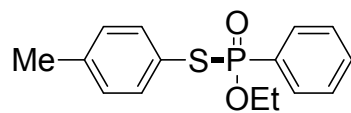

**3am**

**$^{31}\text{P}$  NMR** (121.5 MHz,  $\text{CDCl}_3$ )

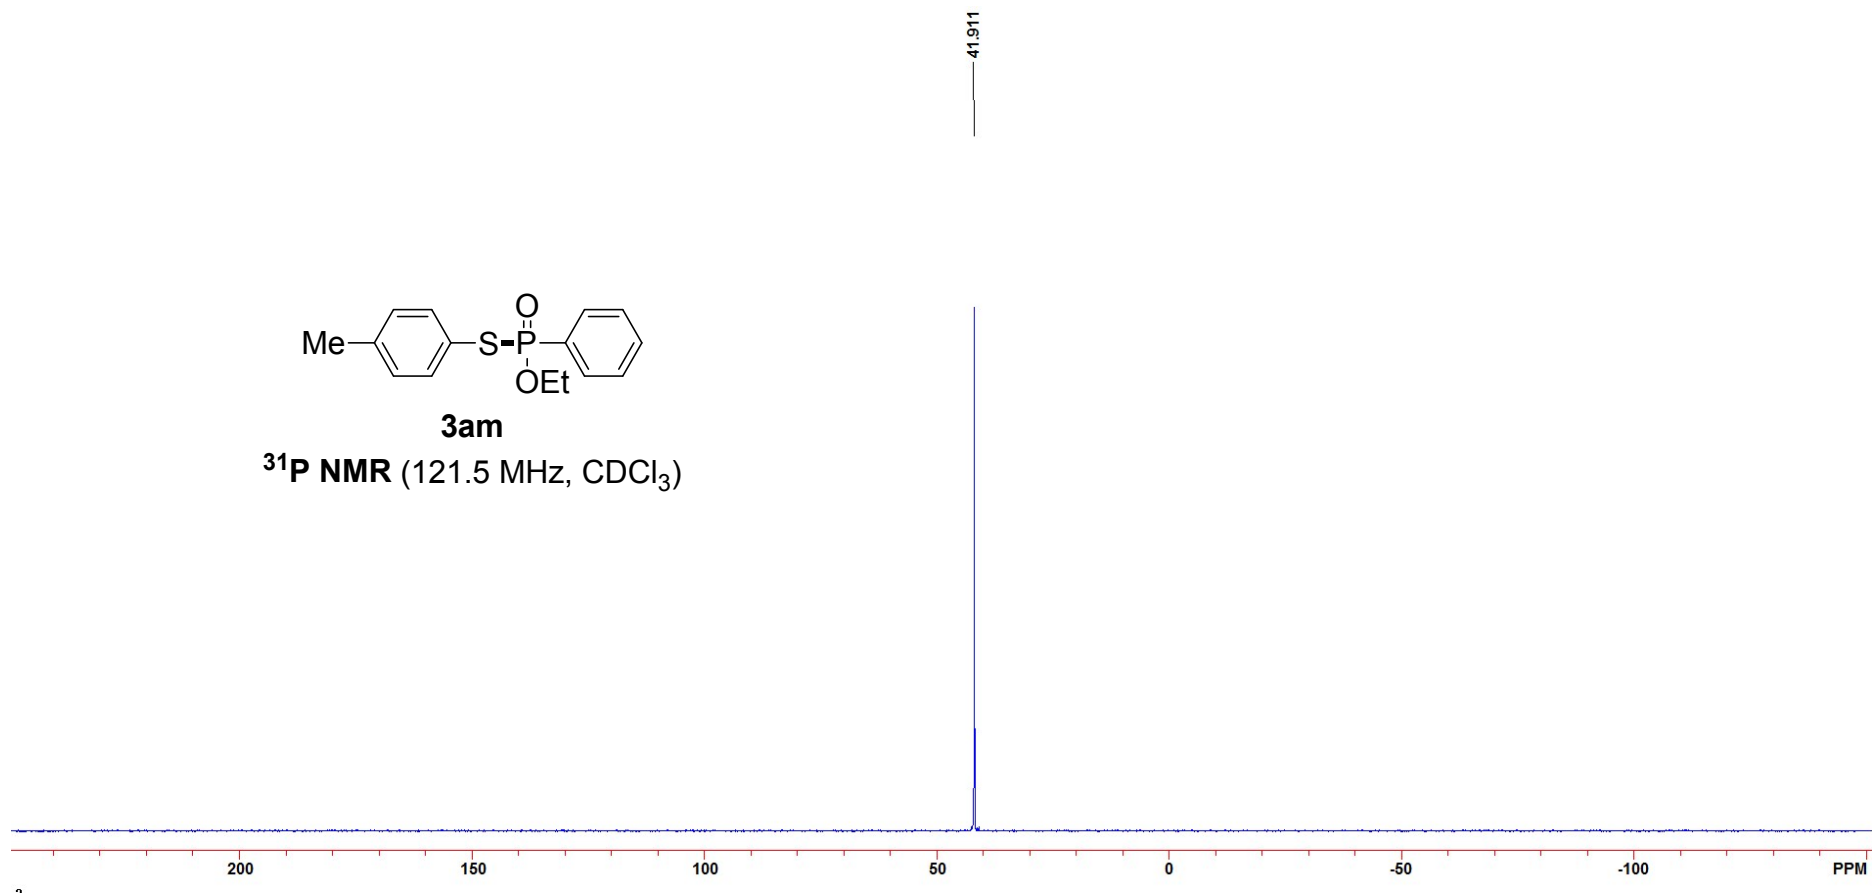

Supplement: c6gc03115c1.pdf [file c6gc03115c1.pdf]
